# Supplementary material for: Comprehensive Research Synopsis and Systematic Meta-Analyses in Parkinson's Disease Genetics: The PDGene Database
Source: PLOS journal article supplement (doi:10.1371/journal.pgen.1002548), 2012-03-15

Figure S2, panel 1. GBA N370S: G vs. A

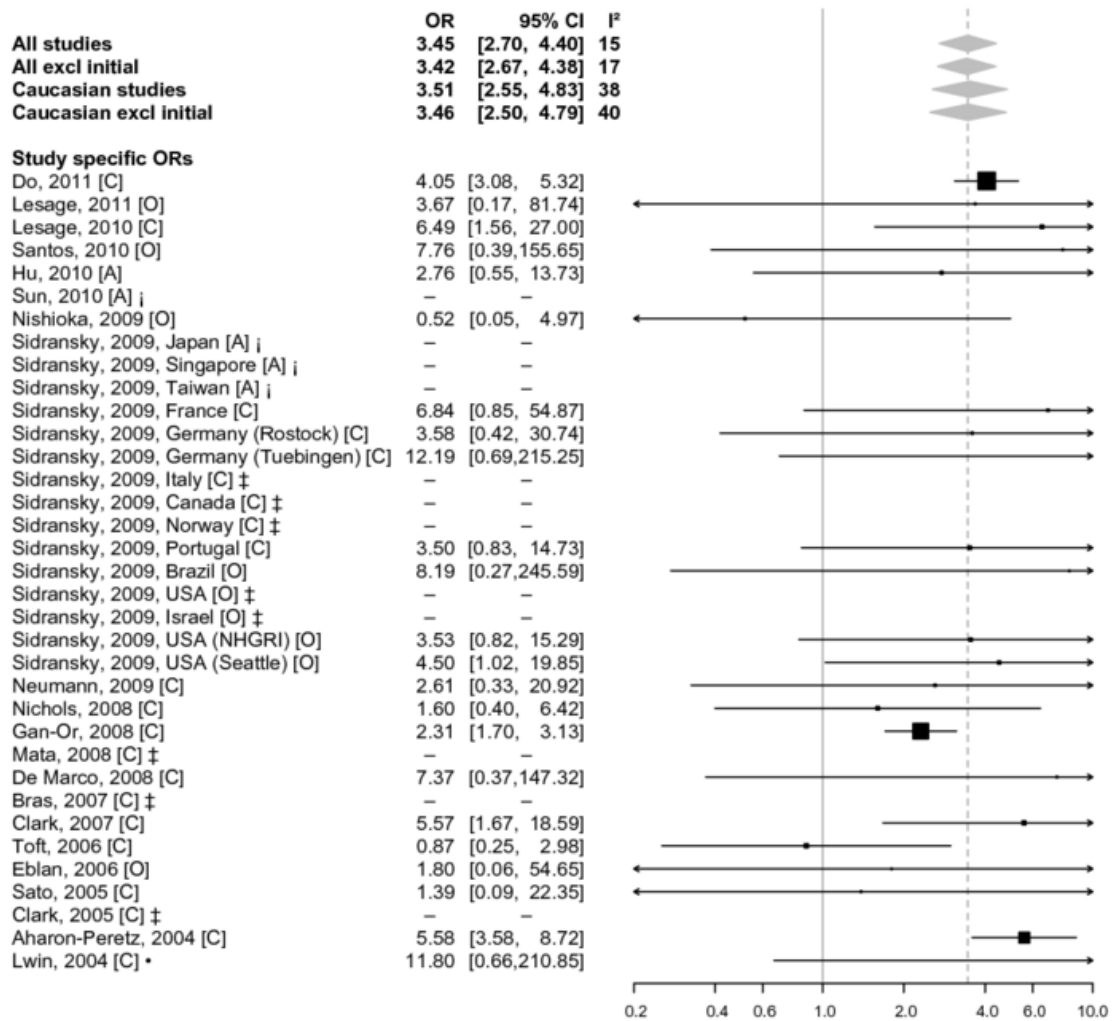

Figure S2, panel 2. *SYT11/RAB25* chr1:154105678: T vs. C

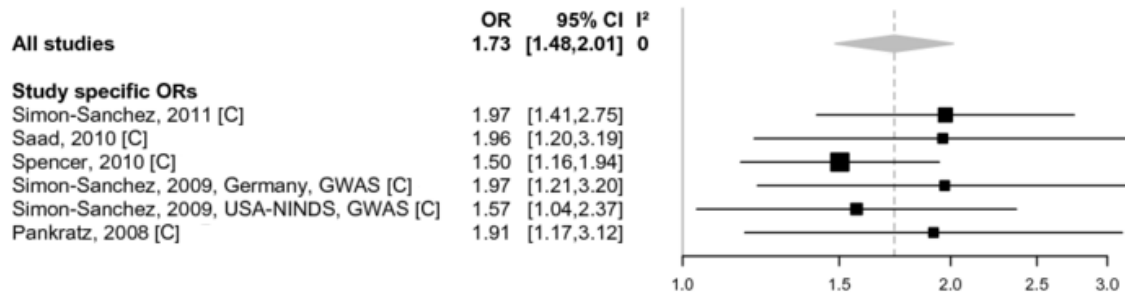

Figure S2, panel 3. *PARK16* rs947211: A vs. G

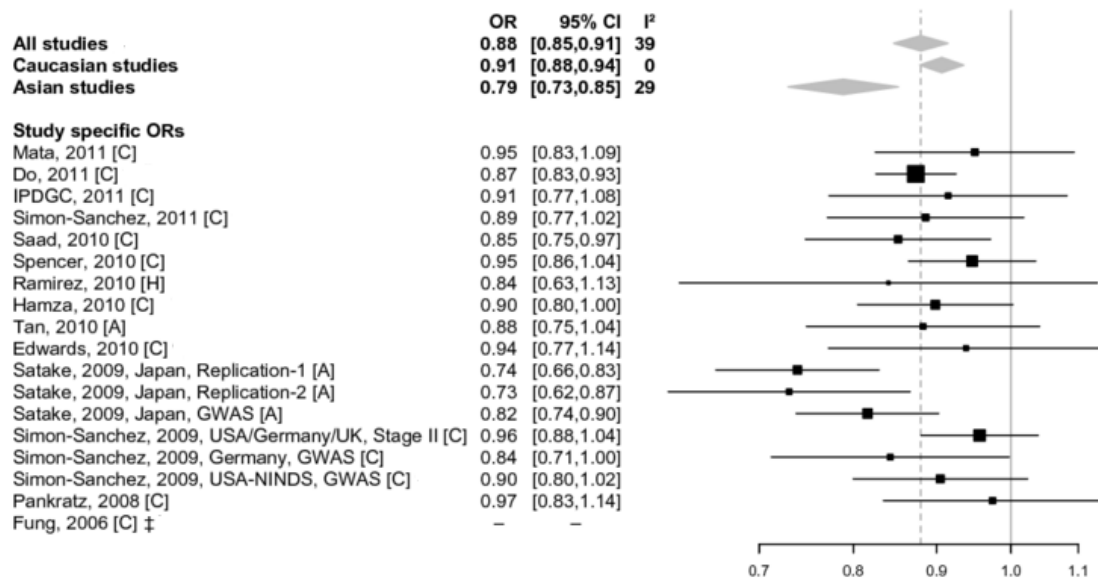

Figure S2, panel 4. *STK39* rs2390669: C vs. A

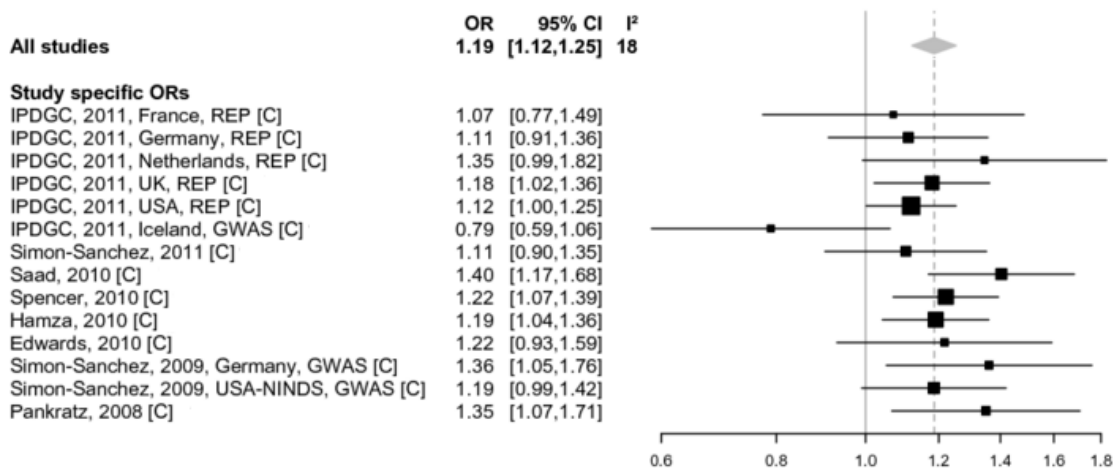

Figure S2, panel 5. *MCCC1/LAMP3* rs11711441: A vs. G

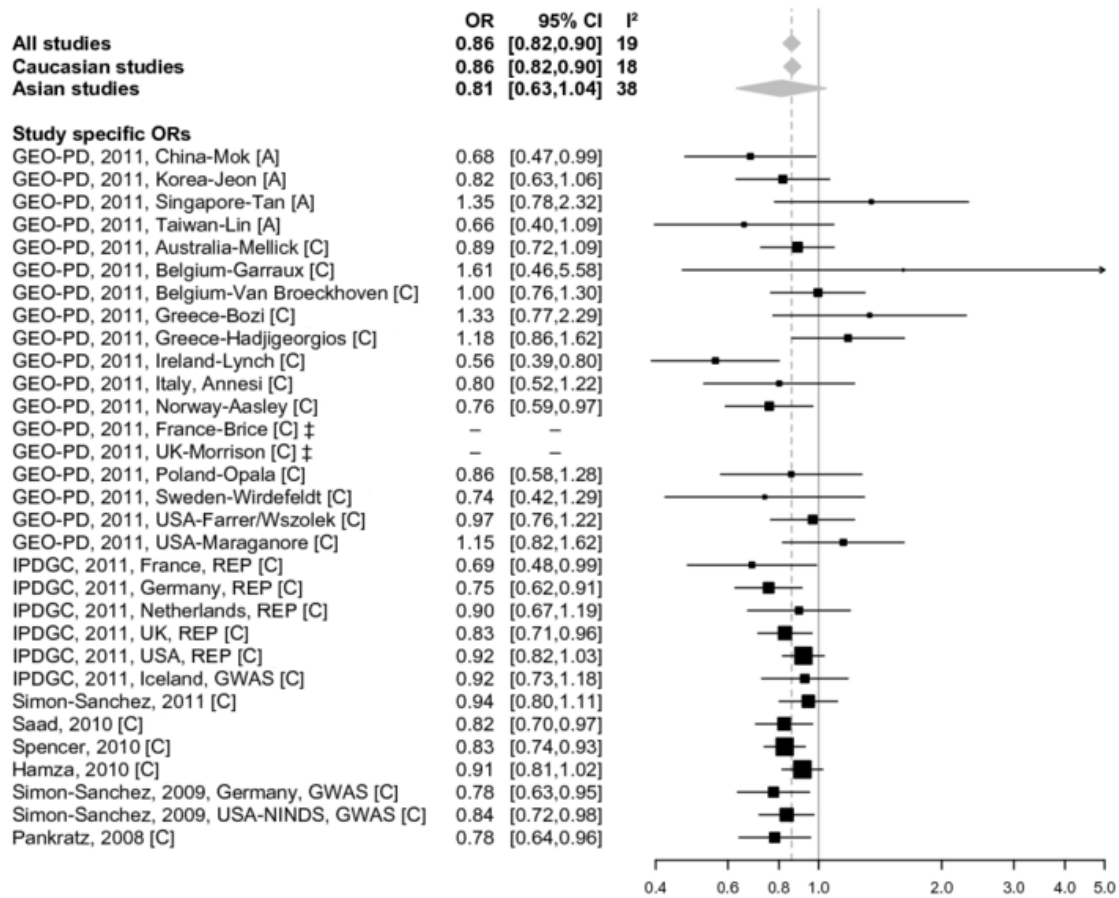

Figure S2, panel 6. *DGKQ/GAK* rs11248060: T vs. C

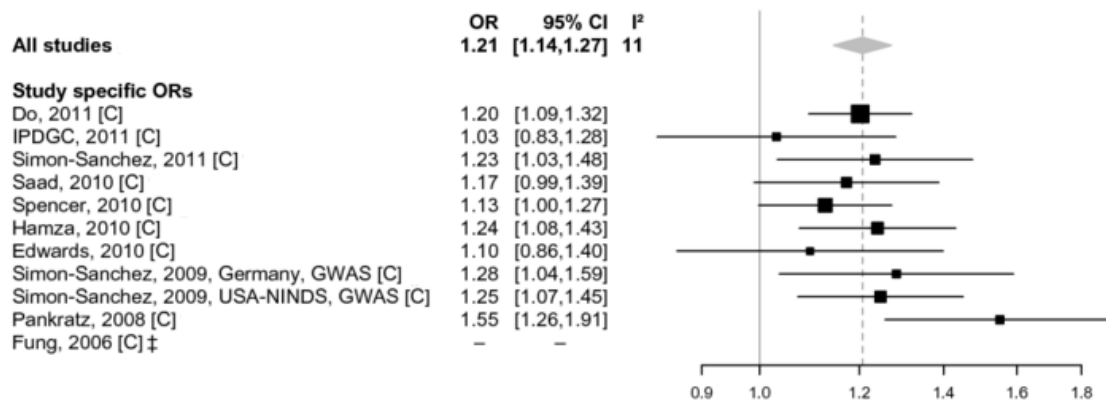

Figure S2, panel 7. *BST1* rs11724635: C vs. A

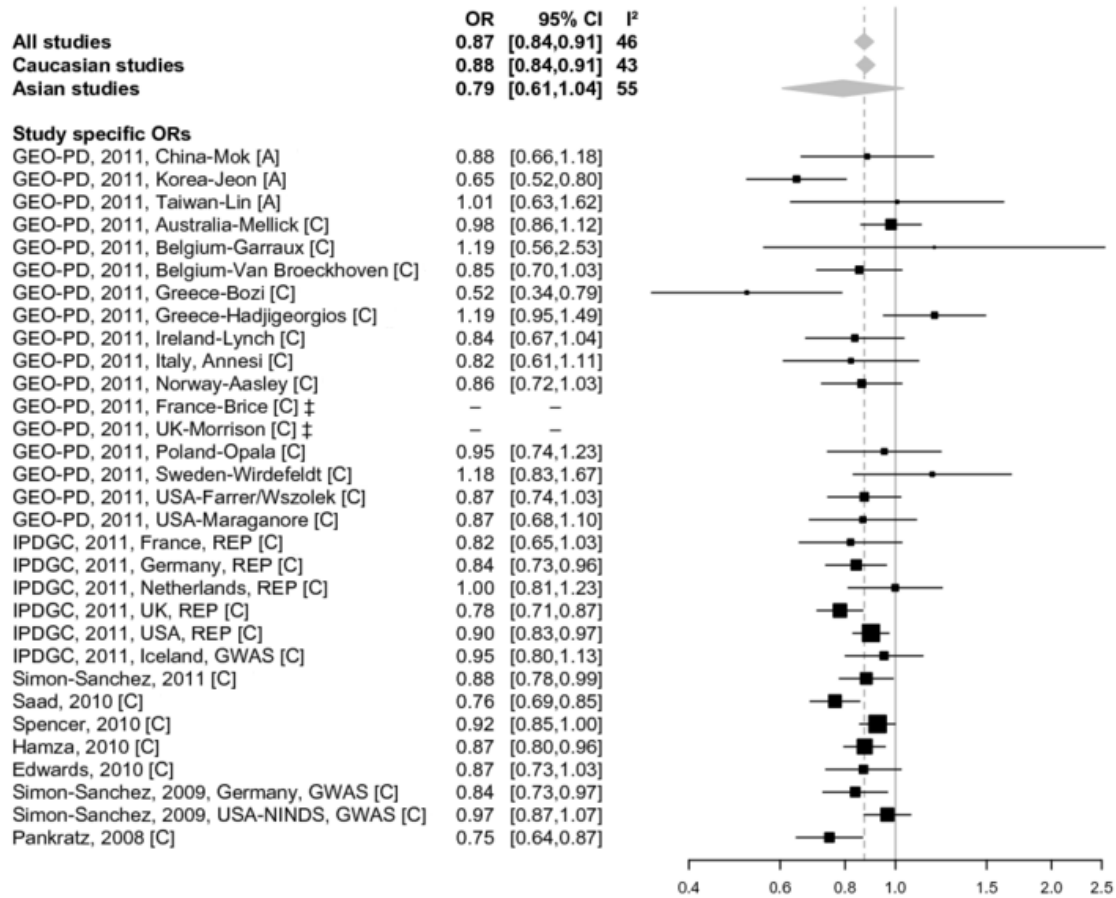

Figure S2, panel 8. SNCA rs356219: G vs. A

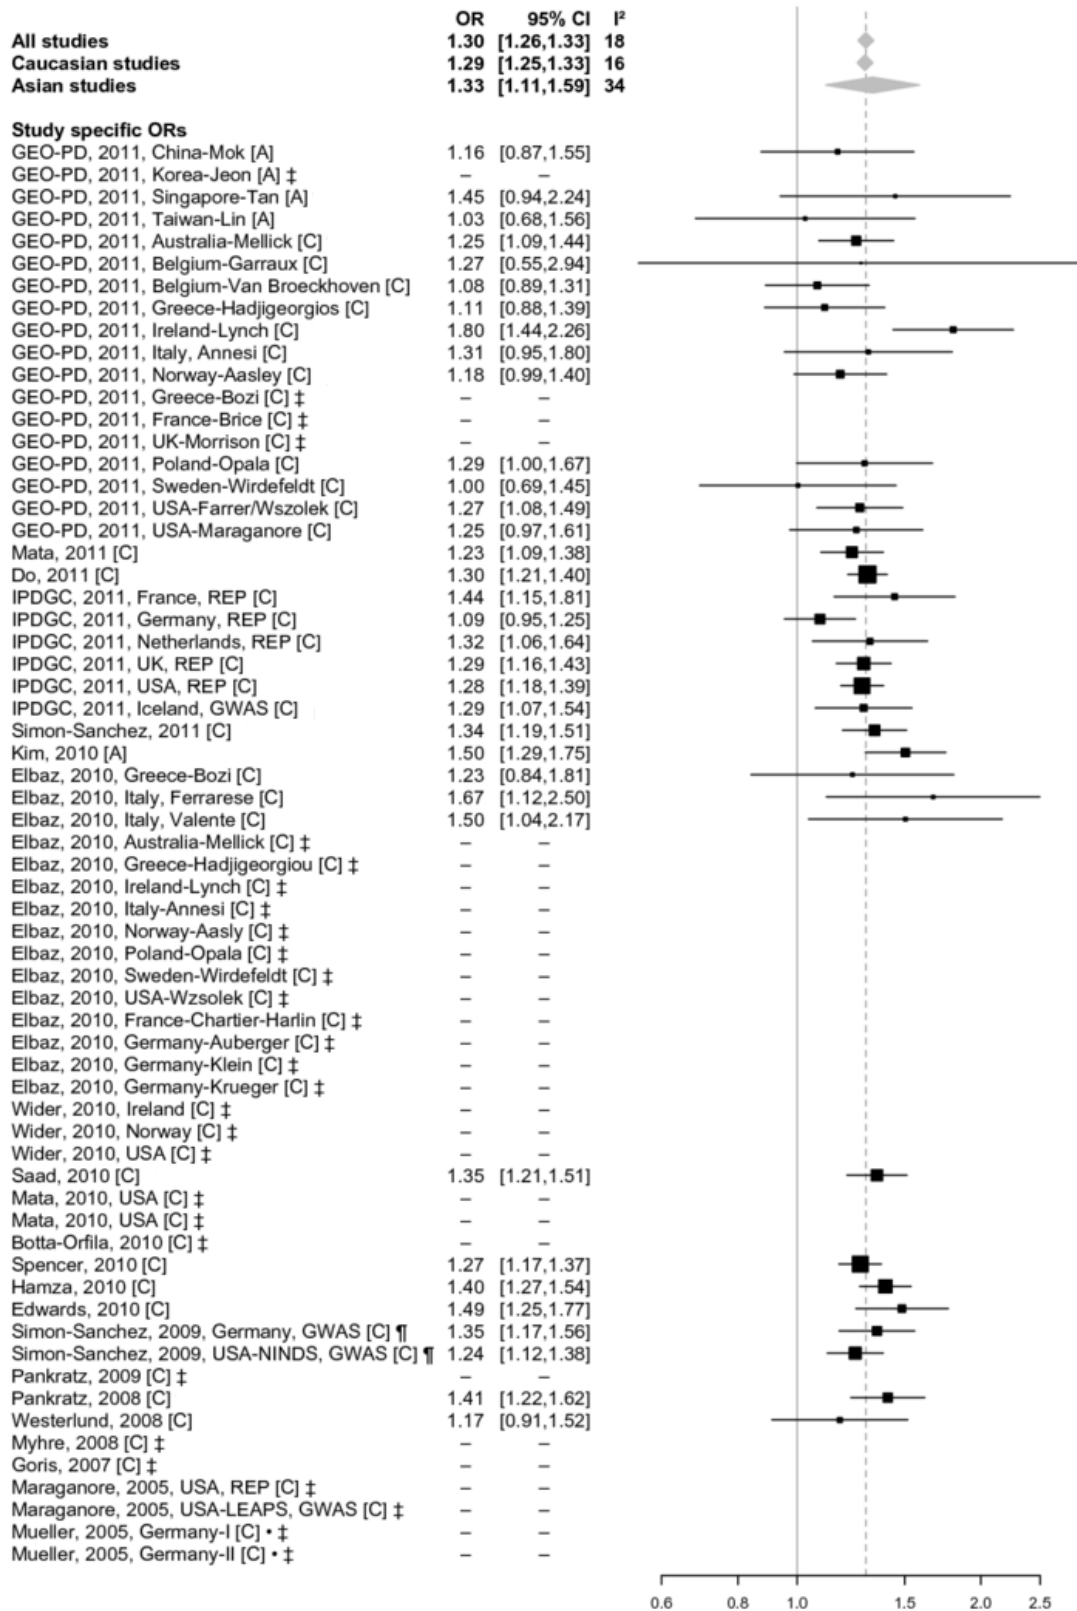

Figure S2, panel 9. *ITGA8* rs7077361: C vs. T

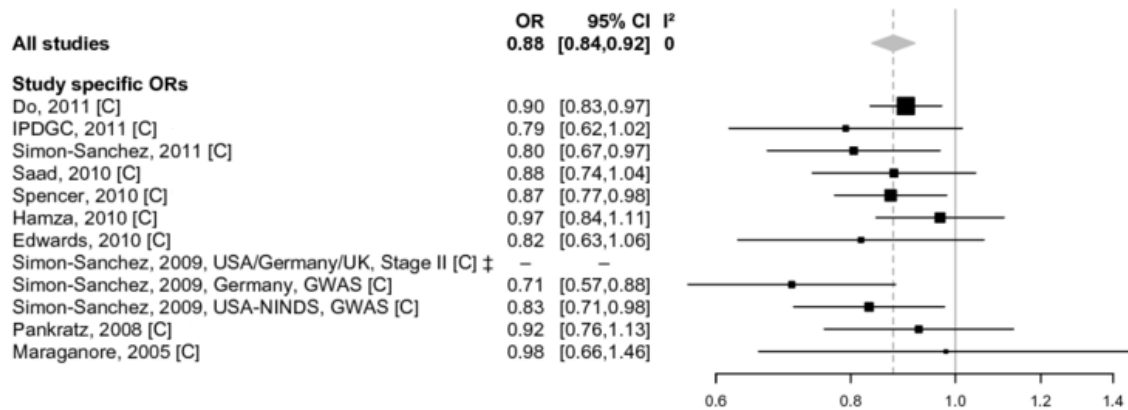

Figure S2, panel 10. *LRRK2* rs1491942: G vs C

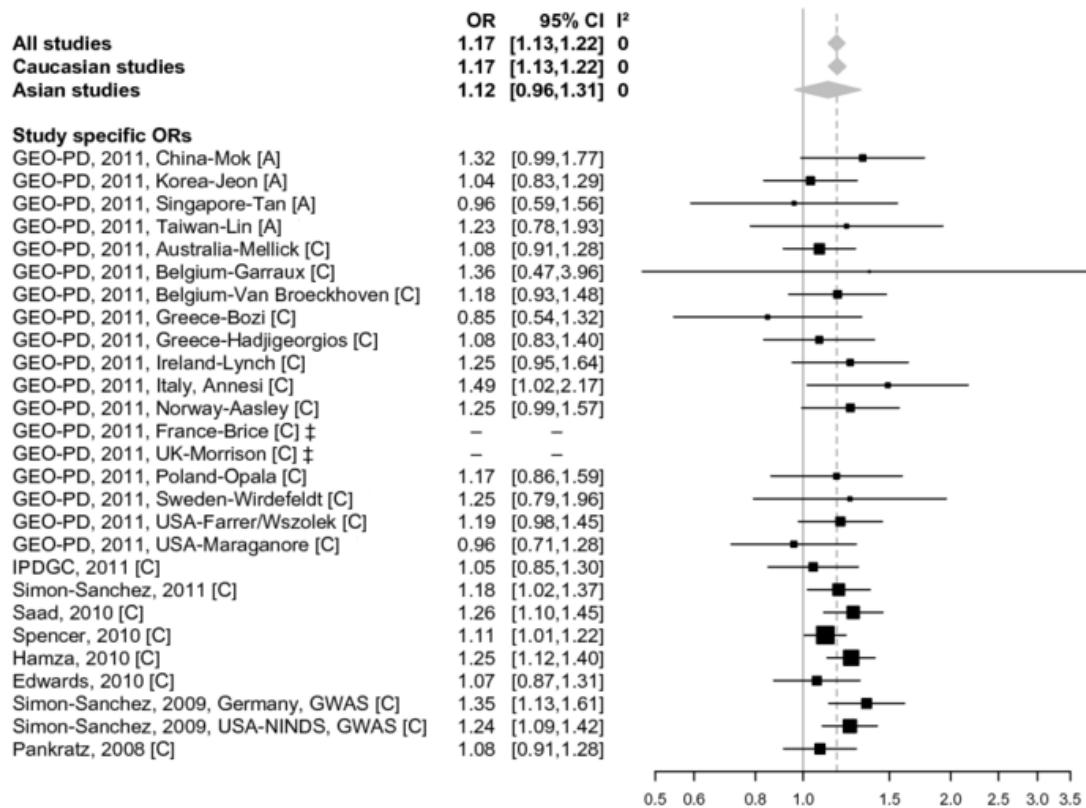

Figure S2, panel 11. *CCDC62/HIP1R* rs10847864: T vs G

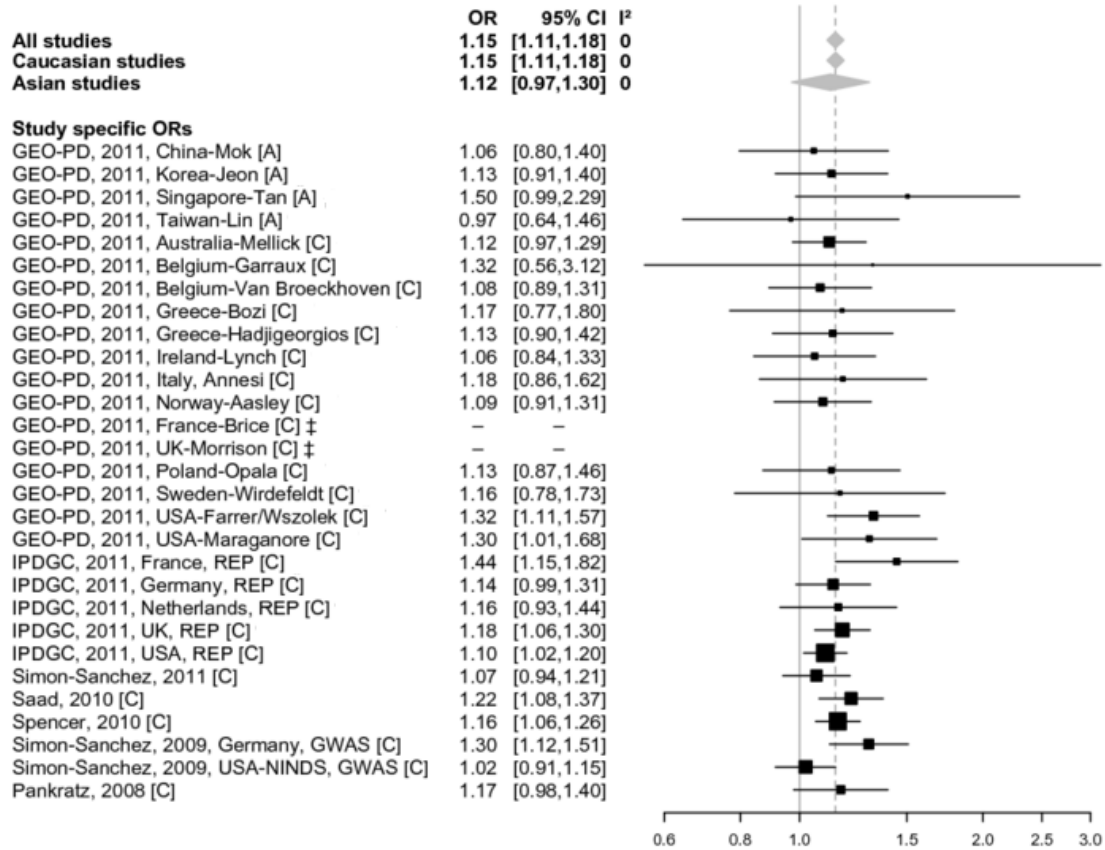

Figure S2, panel 12. *MAPT* H1H2: H2 vs H1

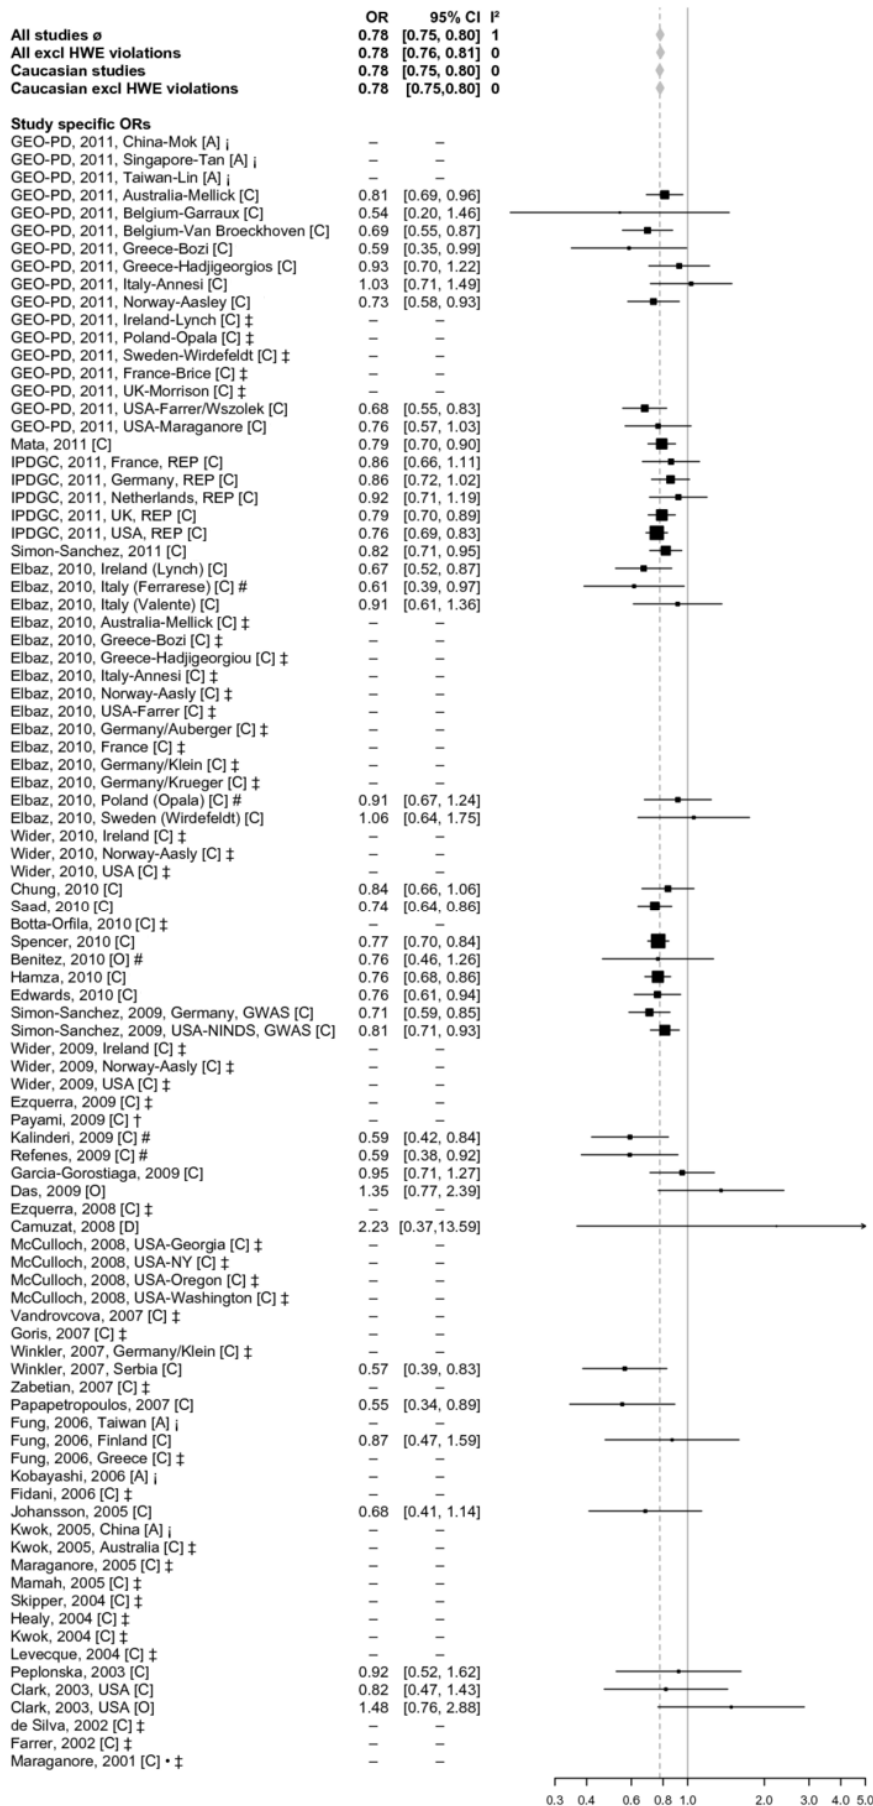



Figure S2, panel 13. PARK16 rs823156: G vs A

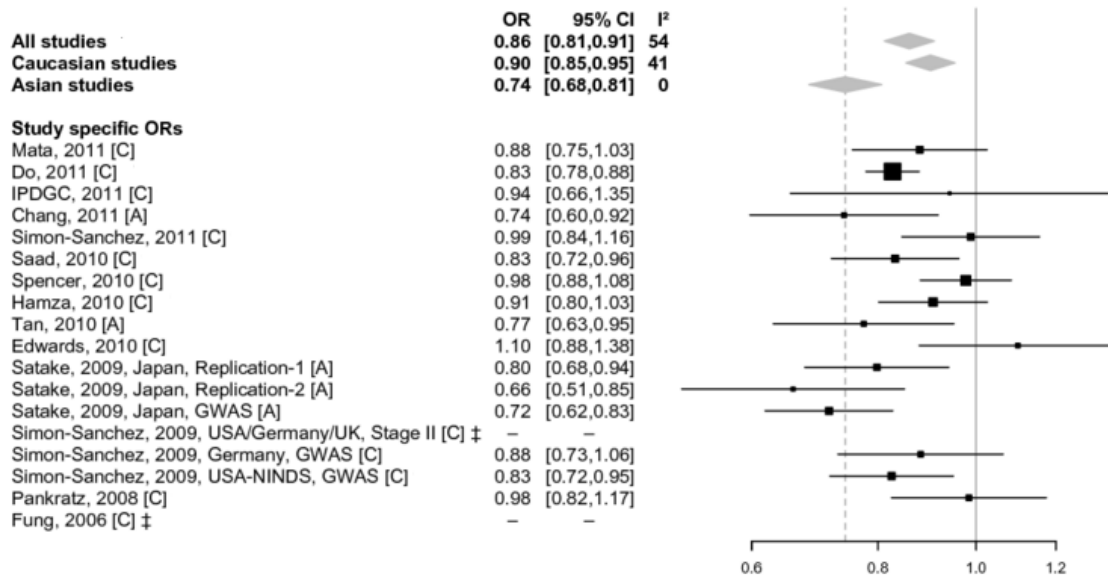

Figure S2, panel 14. BST1 rs4538475: G vs A

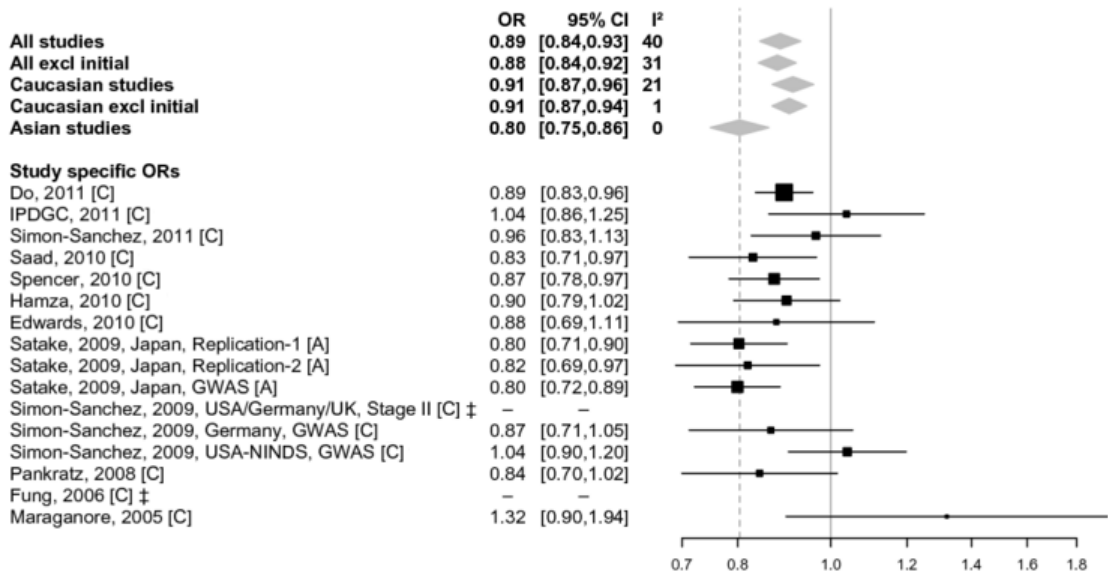

Figure S2, panel 15. SNCA rs6532194: T vs C

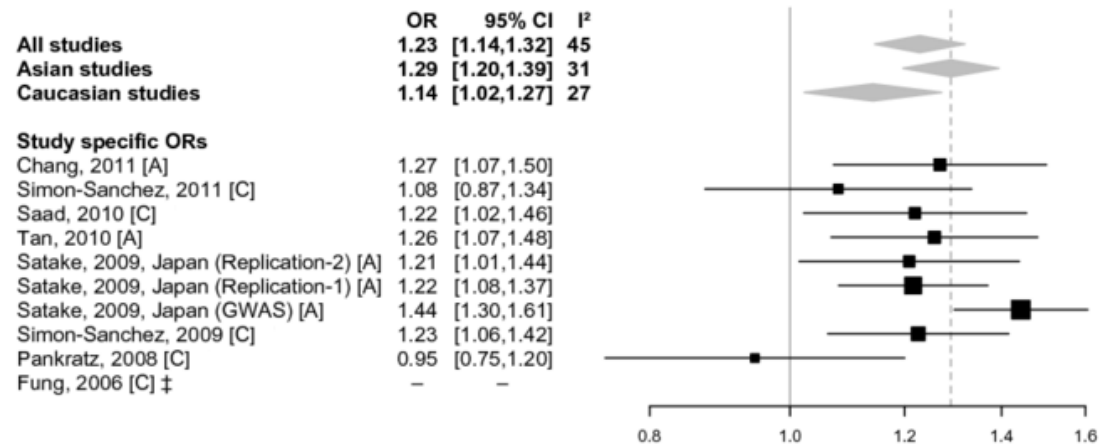

Figure S2, panel 16. *LRKK2* rs34778348: A vs G

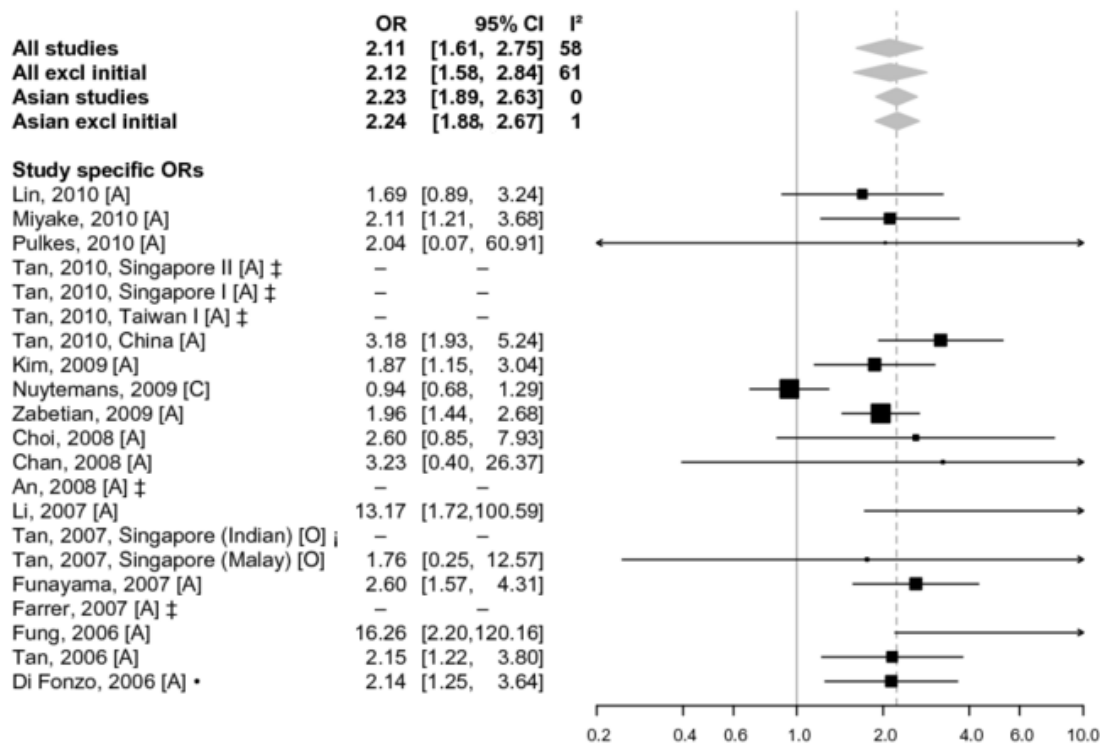

Supplement: S2 (10.1371/journal.pgen.1002548.s002) [file journal.pgen.1002548.s002]
