# Supplementary material for: Comprehensive Research Synopsis and Systematic Meta-Analyses in Parkinson's Disease Genetics: The PDGene Database
Source: PLoS Genet. 2012 Mar 15;8(3):e1002548. doi: 10.1371/journal.pgen.1002548 (PMC3305333; doi:10.1371/journal.pgen.1002548)
Supplement: Table S1 — Overview of all 867 polymorphisms meta-analyzed in the March 31st 2011 datafreeze using random-effects allelic models. Random-effects allelic meta-analyses were performed on polymorphisms for which four or more independent datasets were available. Meta-analyses after stratification for different ethnic descent were performed if at least three independent datasets were available in the respective stratum (applicable only to samples of European and Asian descent). Each nominally significant meta-analysis result (P<0.05) was graded according to the HuGENet interim criteria. For details on how these criteria are applied, see Text S1. Meta-analysis results in this table are ordered by genomic location. OR = Odds Ratio, CI = confidence interval, N minor = number of minor alleles, Ethnicities: C = Caucasian, A = Asian, D = African Descent, H = Hispanic, O = Other/Mixed, Low OR = OR<1.15 or ≥0.87, respectively, F = loss of significance in the respective meta-analysis after exclusion of the first study, HWE = loss of significance after excluding studies violating HWE (P<0.05), Regr = evidence for small-study/publication bias using a modified regression test (see Text S1), A = Grade A (‘strong’ epidemiologic credibility), B = Grade B (‘modest’ epidemiologic credibility), C = Grade C (‘weak’ epidemiologic credibility), logBF = Bayes Factor (see Text S1). “*” denotes SNPs that have been supplemented by additional data after the datafreeze (in total this applies to 147 SNPs, see Text S1 for the description of included datasets). (XLS) [file pgen.1002548.s005.xls]

## Sheet: Supplementary Table 1
Supplementary Table 1. Overview of all 867 polymorphisms meta-analyzed in the March 31st 2011 datafreeze using random-effects allelic models
Genetic locus	Polymorphism	Location (hg18)	Allele contrast	Ethnicity	N studies	N samples	OR (95% CI)	P-value	Amount	N minor	Replication	I2	Bias	Bias reason	Overall Grade	logBF
NTNG1	rs11185076	chr1:107598223	A vs. T	All (C only)	4	3925	1.09 (0.94-1.26)	0.258	-	-	-	-	-	-	-	-
GNAI3	rs6692804	chr1:109910265	A vs. G	C	4	3966	0.94 (0.71-1.23)	0.627	-	-	-	-	-	-	-	-
GNAI3	rs6692804	chr1:109910265	A vs. G	All (C, A)	5	4744	0.96 (0.78-1.18)	0.701	-	-	-	-	-	-	-	-
GSTM1	GSTM1*0	chr1:110034444	ins vs. del	C	12	6150	0.90 (0.83-0.98)	0.0153	A	3465	A	0	C	Low OR	C	<1
GSTM1	GSTM1*0	chr1:110034444	ins vs. del	All (C, A, O)	15	7897	0.92 (0.84-1.01)	0.075	-	-	-	-	-	-	-	-
CHI3L2	rs17654531	chr1:111601208	G vs. A	All (C only)	4	14323	0.95 (0.75-1.19)	0.645	-	-	-	-	-	-	-	-
MTHFR	rs1801131	chr1:11777063	C vs. A	C	4	3877	0.96 (0.87-1.06)	0.467	-	-	-	-	-	-	-	-
MTHFR	rs1801131	chr1:11777063	C vs. A	All (C, A)	6	4540	0.98 (0.89-1.07)	0.594	-	-	-	-	-	-	-	-
MTHFR	rs1801133	chr1:11778965	T vs. C	A	4	998	1.29 (1.06-1.58)	0.0116	B	554	A	0	A	-	B	<1
MTHFR	rs1801133*	chr1:11778965	T vs. C	All (C, A)	20	61864	1.02 (0.97-1.08)	0.412	-	-	-	-	-	-	-	-
MTHFR	rs1801133*	chr1:11778965	T vs. C	C	16	60866	1.01 (0.95-1.06)	0.833	-	-	-	-	-	-	-	-
PRDM2	rs2245218	chr1:14012413	G vs. A	All (C, A, O)	25	17275	1.06 (0.98-1.14)	0.168	-	-	-	-	-	-	-	-
PRDM2	rs2245218	chr1:14012413	G vs. A	C	19	15347	1.05 (0.96-1.15)	0.279	-	-	-	-	-	-	-	-
ARNT	rs2228099	chr1:149075513	G vs. C	C	3	3554	1.05 (0.95-1.16)	0.324	-	-	-	-	-	-	-	-
ARNT	rs2228099	chr1:149075513	G vs. C	All (C, A)	4	3934	1.04 (0.95-1.14)	0.43	-	-	-	-	-	-	-	-
TDRD10	rs4584384	chr1:152762321	T vs. C	All (C only)	4	21327	1.00 (0.88-1.14)	0.957	-	-	-	-	-	-	-	-
GBA	N370S*	chr1:153451576	G vs. A	All (C, A, O)	23	49180	3.45 (2.70-4.40)	2.27e-23	A	1258	n.a.	15	n.a.	-	A	13.9
GBA	N370S*	chr1:153451576	G vs. A	C	15	44851	3.51 (2.55-4.83)	1.44e-14	A	1203	n.a.	38	n.a.	-	A	6.6
GBA	rs2230288*	chr1:153472791	A vs. G	All (C, O)	8	8290	1.59 (1.17-2.16)	0.00309	B	301	A	15	A	-	B	<1
GBA	rs2230288*	chr1:153472791	A vs. G	C	7	7919	1.58 (1.12-2.23)	0.00979	B	298	B	27	A	-	B	<1
SYT11/RAB25	chr1:154105678*	chr1:154105678	T vs. C	All (C only)	6	17300	1.73 (1.48-2.02)	2.35e-12	B	847	n.a.	0	n.a.	-	B	8.2
SYT11/RAB25	rs34372695*	chr1:154296661	T vs. C	All (C only)	13	31549	1.46 (1.31-1.62)	3.6e-12	A	1760	n.a.	5	n.a.	-	A	8.8
CASP9	rs4646066	chr1:15701813	A vs. G	C	3	3690	1.03 (0.90-1.17)	0.701	-	-	-	-	-	-	-	-
CASP9	rs4646066	chr1:15701813	A vs. G	All (C, A)	4	4069	0.97 (0.83-1.14)	0.734	-	-	-	-	-	-	-	-
CASP9	rs933704	chr1:15721283	C vs. T	All (C, A)	4	4089	0.97 (0.84-1.13)	0.714	-	-	-	-	-	-	-	-
CASP9	rs933704	chr1:15721283	C vs. T	C	3	3708	1.02 (0.90-1.16)	0.765	-	-	-	-	-	-	-	-
LMX1A	rs1891931	chr1:163427202	G vs. T	All (C only)	4	9287	0.99 (0.93-1.07)	0.841	-	-	-	-	-	-	-	-
LMX1A	rs1394448	chr1:163566470	C vs. T	All (C only)	4	5322	0.97 (0.87-1.09)	0.59	-	-	-	-	-	-	-	-
ATP13A2	rs15786	chr1:17185179	A vs. G	C	3	4044	1.09 (0.87-1.35)	0.466	-	-	-	-	-	-	-	-
ATP13A2	rs15786	chr1:17185179	A vs. G	All (C, O)	4	4642	1.06 (0.80-1.40)	0.679	-	-	-	-	-	-	-	-
ATP13A2	rs3738815	chr1:17187289	A vs. G	All (C only)	5	8653	0.98 (0.89-1.07)	0.65	-	-	-	-	-	-	-	-
ATP13A2	rs4920608	chr1:17191874	C vs. T	All (C, O)	4	4526	0.97 (0.89-1.06)	0.466	-	-	-	-	-	-	-	-
ATP13A2	rs4920608	chr1:17191874	C vs. T	C	3	3916	0.97 (0.88-1.08)	0.595	-	-	-	-	-	-	-	-
ATP13A2	rs6684770	chr1:17198542	A vs. G	All (C, O)	5	5095	1.03 (0.94-1.13)	0.497	-	-	-	-	-	-	-	-
ATP13A2	rs6684770	chr1:17198542	A vs. G	C	4	4497	1.02 (0.93-1.12)	0.641	-	-	-	-	-	-	-	-
ATP13A2	rs3738814	chr1:17204263	G vs. A	All (C, O)	5	9073	1.02 (0.95-1.09)	0.665	-	-	-	-	-	-	-	-
ATP13A2	rs3738814	chr1:17204263	G vs. A	C	4	8473	1.01 (0.93-1.09)	0.907	-	-	-	-	-	-	-	-
ATP13A2	rs2076600	chr1:17209978	A vs. G	C	3	3901	0.98 (0.82-1.17)	0.849	-	-	-	-	-	-	-	-
ATP13A2	rs2076600	chr1:17209978	A vs. G	All (C, O)	4	4509	1.01 (0.88-1.16)	0.908	-	-	-	-	-	-	-	-
ATP13A2	rs11203280	chr1:17215370	T vs. G	All (C only)	4	7720	1.04 (0.91-1.19)	0.558	-	-	-	-	-	-	-	-
PTGS2	rs20417*	chr1:184916944	G vs. C	All (C only)	12	60040	1.02 (0.96-1.08)	0.505	-	-	-	-	-	-	-	-
PRKCZ	rs1878745	chr1:1980874	G vs. A	C	3	2772	1.03 (0.88-1.20)	0.74	-	-	-	-	-	-	-	-
PRKCZ	rs1878745	chr1:1980874	G vs. A	All (C, A)	4	3153	1.00 (0.87-1.15)	0.993	-	-	-	-	-	-	-	-
SLC45A3	rs16856139	chr1:203905087	T vs. C	A	5	22876	0.75 (0.67-0.83)	2.49e-08	A	5840	n.a.	12	n.a.	-	A	5.4
SLC45A3	rs16856139*	chr1:203905087	T vs. C	All (C, A)	15	83097	0.88 (0.80-0.97)	0.0117	A	11179	C	61	C	Low OR	C	<1
SLC45A3	rs16856139*	chr1:203905087	T vs. C	C	10	60221	0.97 (0.87-1.08)	0.565	-	-	-	-	-	-	-	-
NUCKS1	rs823128*	chr1:203980001	G vs. A	All (C, A, H, O)	19	93669	0.77 (0.72-0.83)	1.38e-11	A	9309	n.a.	25	n.a.	Regr	A	8.5
NUCKS1	rs823128	chr1:203980001	G vs. A	A	5	22244	0.72 (0.66-0.80)	4.13e-11	A	5817	n.a.	0	n.a.	-	A	7.9
NUCKS1	rs823128*	chr1:203980001	G vs. A	C	12	70605	0.82 (0.73-0.92)	0.000545	A	3279	B	34	C	Regr	C	1.6
NUCKS1	rs823122	chr1:203991651	C vs. T	A	3	20394	0.73 (0.66-0.82)	3.59e-08	A	5266	n.a.	0	n.a.	-	A	5.2
NUCKS1	rs823122*	chr1:203991651	C vs. T	All (C, A)	14	82822	0.83 (0.78-0.89)	4.21e-08	A	10668	n.a.	9	n.a.	-	A	5.3
NUCKS1	rs823122*	chr1:203991651	C vs. T	C	11	62428	0.88 (0.82-0.94)	0.000308	A	5402	A	0	C	Low OR	C	1.7
SLC41A1	rs947211*	chr1:204019288	A vs. G	All (C, A, H)	17	91367	0.88 (0.85-0.92)	9.61e-11	A	53643	n.a.	39	n.a.	Low OR	A	7.7
SLC41A1	rs947211*	chr1:204019288	A vs. G	C	12	69262	0.91 (0.88-0.94)	8e-10	A	32265	n.a.	0	n.a.	Low OR	A	6.8
SLC41A1	rs947211	chr1:204019288	A vs. G	A	4	21742	0.79 (0.73-0.85)	2.81e-09	A	21072	n.a.	29	n.a.	-	A	6.4
SLC41A1	rs823156	chr1:204031263	G vs. A	A	5	22870	0.74 (0.68-0.81)	2.09e-12	A	7751	n.a.	0	n.a.	-	A	9.2
SLC41A1	rs823156*	chr1:204031263	G vs. A	All (C, A)	16	85837	0.86 (0.81-0.91)	1.79e-07	A	29305	C	54	A	-	C	4.7
SLC41A1	rs823156*	chr1:204031263	G vs. A	C	11	62967	0.90 (0.85-0.95)	0.000284	A	21554	B	41	C	Low OR, Regr	C	1.7
SLC41A1	rs708730	chr1:204044403	G vs. A	A	3	20393	0.75 (0.68-0.84)	2.07e-07	A	6904	A	14	A	-	A	4.6
SLC41A1	rs708730*	chr1:204044403	G vs. A	All (C, A)	13	81173	0.89 (0.83-0.95)	0.00105	A	27018	C	68	C	Low OR	C	1.3
SLC41A1	rs708730*	chr1:204044403	G vs. A	C	10	60780	0.93 (0.86-1.00)	0.042	A	20114	C	64	C	Low OR, Regr	C	<1
PM20D1	rs11240572*	chr1:204074636	A vs. C	All (C, A)	11	83607	0.76 (0.71-0.81)	2.25e-17	A	9843	n.a.	0	n.a.	-	A	14
PM20D1	rs11240572	chr1:204074636	A vs. C	A	4	21741	0.76 (0.69-0.83)	2.42e-09	A	6894	n.a.	0	n.a.	-	A	6.4
PM20D1	rs11240572*	chr1:204074636	A vs. C	C	7	61866	0.77 (0.69-0.86)	2.4e-06	A	2949	A	19	A	-	A	3.6
IL10	rs1800896	chr1:205013520	G vs. A	All (C only)	6	8873	0.96 (0.90-1.03)	0.23	-	-	-	-	-	-	-	-
CR2	rs3767933	chr1:205703982	G vs. A	C	3	3668	1.01 (0.92-1.11)	0.874	-	-	-	-	-	-	-	-
CR2	rs3767933	chr1:205703982	G vs. A	All (C, A)	4	4048	1.01 (0.92-1.10)	0.88	-	-	-	-	-	-	-	-
PLXNA2	rs6656034	chr1:206305799	A vs. G	C	5	4682	0.93 (0.81-1.06)	0.259	-	-	-	-	-	-	-	-
PLXNA2	rs6656034	chr1:206305799	A vs. G	All (C, A)	6	5422	0.95 (0.85-1.06)	0.326	-	-	-	-	-	-	-	-
PINK1	rs45530340	chr1:20832817	T vs. C	C	6	4257	1.03 (0.86-1.24)	0.75	-	-	-	-	-	-	-	-
PINK1	rs45530340	chr1:20832817	T vs. C	All (C, O)	7	4423	1.02 (0.85-1.21)	0.849	-	-	-	-	-	-	-	-
PINK1	Q115L	chr1:20832973	T vs. A	All (C, O)	8	2815	0.69 (0.50-0.96)	0.0293	B	231	A	15	C	HWE	C	<1
PINK1	Q115L	chr1:20832973	T vs. A	C	6	1888	0.77 (0.57-1.05)	0.0994	-	-	-	-	-	-	-	-
PINK1	rs3820321	chr1:20835414	A vs. G	All (C only)	4	4605	0.98 (0.88-1.09)	0.722	-	-	-	-	-	-	-	-
PINK1	IVS1-7A>G	chr1:20836915	A vs. G	All (C, O)	4	1080	0.94 (0.72-1.23)	0.65	-	-	-	-	-	-	-	-
PINK1	IVS1-7A>G	chr1:20836915	A vs. G	C	3	976	0.96 (0.72-1.28)	0.769	-	-	-	-	-	-	-	-
PINK1	rs3738133	chr1:20838029	C vs. T	All (C only)	5	8712	0.98 (0.92-1.06)	0.647	-	-	-	-	-	-	-	-
PINK1	rs3121680	chr1:20838529	G vs. A	All (C only)	4	8436	0.98 (0.92-1.05)	0.647	-	-	-	-	-	-	-	-
PINK1	IVS4-5G>A	chr1:20844635	G vs. A	C	3	972	0.97 (0.67-1.40)	0.866	-	-	-	-	-	-	-	-
PINK1	IVS4-5G>A	chr1:20844635	G vs. A	All (C, O)	4	1103	0.99 (0.74-1.32)	0.957	-	-	-	-	-	-	-	-
PINK1	rs3738136	chr1:20844698	A vs. G	All (C, A, O)	14	8277	1.08 (0.95-1.23)	0.255	-	-	-	-	-	-	-	-
PINK1	rs3738136	chr1:20844698	A vs. G	A	3	2114	1.12 (0.80-1.56)	0.521	-	-	-	-	-	-	-	-
PINK1	rs3738136	chr1:20844698	A vs. G	C	9	5340	1.03 (0.85-1.23)	0.789	-	-	-	-	-	-	-	-
PINK1	rs1043424*	chr1:20849587	C vs. A	All (C, A, O)	19	62671	1.00 (0.96-1.04)	0.904	-	-	-	-	-	-	-	-
PINK1	rs1043424*	chr1:20849587	C vs. A	C	17	61685	1.00 (0.96-1.04)	0.937	-	-	-	-	-	-	-	-
PINK1	rs8064	chr1:20850186	G vs. C	All (C only)	5	5617	0.97 (0.86-1.10)	0.617	-	-	-	-	-	-	-	-
PINK1	rs1043502	chr1:20850335	G vs. T	All (C only)	5	5626	1.00 (0.92-1.08)	0.901	-	-	-	-	-	-	-	-
DDOST	rs640742	chr1:20857141	G vs. T	All (C only)	4	8634	1.02 (0.96-1.09)	0.539	-	-	-	-	-	-	-	-
GPATCH2	rs265120	chr1:215659568	C vs. T	All (C only)	4	14656	1.03 (0.83-1.28)	0.777	-	-	-	-	-	-	-	-
GPATCH2	rs187286	chr1:215659907	G vs. A	All (C only)	4	15812	1.03 (0.84-1.25)	0.806	-	-	-	-	-	-	-	-
TGFB2	rs10495098	chr1:216582933	T vs. G	All (C only)	4	10073	1.00 (0.89-1.13)	0.999	-	-	-	-	-	-	-	-
MOSC1	rs2642444*	chr1:219040841	G vs. A	All (C only)	10	56892	1.04 (0.98-1.11)	0.183	-	-	-	-	-	-	-	-
MOSC1	rs11118618	chr1:219078169	A vs. G	All (C only)	4	16735	1.06 (0.95-1.18)	0.331	-	-	-	-	-	-	-	-
CAPN2	rs1153952*	chr1:222025170	C vs. T	C	10	57601	1.02 (0.98-1.06)	0.42	-	-	-	-	-	-	-	-
CAPN2	rs1153952*	chr1:222025170	C vs. T	All (C, A)	11	57981	1.02 (0.98-1.06)	0.43	-	-	-	-	-	-	-	-
CDC42	rs12740705	chr1:22293700	T vs. C	All (C, A)	5	8398	1.01 (0.87-1.18)	0.873	-	-	-	-	-	-	-	-
CDC42	rs12740705	chr1:22293700	T vs. C	C	4	7671	1.00 (0.82-1.23)	0.977	-	-	-	-	-	-	-	-
EPHX1	rs1051740	chr1:224086256	C vs. T	All (C only)	5	10246	1.01 (0.90-1.12)	0.886	-	-	-	-	-	-	-	-
EPHX1	rs2234922	chr1:224093029	G vs. A	All (C only)	5	10278	0.99 (0.89-1.10)	0.793	-	-	-	-	-	-	-	-
EPHB2	rs10917325*	chr1:23081865	T vs. C	All (C, A)	11	54993	0.98 (0.93-1.03)	0.411	-	-	-	-	-	-	-	-
EPHB2	rs10917325*	chr1:23081865	T vs. C	C	10	54255	0.98 (0.92-1.04)	0.424	-	-	-	-	-	-	-	-
MTR	rs1805087	chr1:235115123	G vs. A	All (C, A)	4	7546	1.04 (0.95-1.13)	0.438	-	-	-	-	-	-	-	-
MTR	rs1805087	chr1:235115123	G vs. A	C	3	7122	1.04 (0.94-1.14)	0.458	-	-	-	-	-	-	-	-
CCDC21	rs10902724	chr1:26448619	A vs. G	All (C only)	4	10112	1.10 (0.85-1.44)	0.46	-	-	-	-	-	-	-	-
HIVEP3	rs648178	chr1:41774750	T vs. C	All (C only)	5	9299	0.98 (0.91-1.06)	0.576	-	-	-	-	-	-	-	-
HIVEP3	rs2475839	chr1:41778592	A vs. G	All (C only)	4	8164	1.03 (0.89-1.20)	0.7	-	-	-	-	-	-	-	-
HIVEP3	rs7527409*	chr1:41805997	C vs. T	All (C only)	12	60250	1.03 (0.94-1.12)	0.557	-	-	-	-	-	-	-	-
HIVEP3	rs1007221	chr1:41812358	A vs. G	All (C only)	4	3651	1.06 (0.91-1.24)	0.471	-	-	-	-	-	-	-	-
HIVEP3	rs2038978	chr1:41867306	A vs. G	All (C only)	4	3716	1.00 (0.91-1.09)	0.915	-	-	-	-	-	-	-	-
HIVEP3	rs1105414	chr1:41917351	A vs. G	All (C only)	5	5069	0.96 (0.80-1.16)	0.692	-	-	-	-	-	-	-	-
HIVEP3	rs10493099	chr1:41959792	C vs. T	All (C only)	4	3538	0.96 (0.68-1.36)	0.826	-	-	-	-	-	-	-	-
HIVEP3	rs1039997	chr1:42003693	C vs. T	All (C only)	4	3838	1.01 (0.92-1.11)	0.847	-	-	-	-	-	-	-	-
HIVEP3	rs616366	chr1:42050368	A vs. T	All (C only)	4	3805	0.99 (0.89-1.10)	0.822	-	-	-	-	-	-	-	-
HIVEP3	rs661225	chr1:42082752	C vs. T	All (C only)	5	5567	1.01 (0.94-1.10)	0.73	-	-	-	-	-	-	-	-
HIVEP3	rs710229	chr1:42109835	T vs. G	All (C only)	4	3903	1.00 (0.89-1.12)	0.944	-	-	-	-	-	-	-	-
HIVEP3	rs7554964	chr1:42150816	T vs. C	All (C only)	4	3868	1.03 (0.94-1.13)	0.498	-	-	-	-	-	-	-	-
EIF2B3	rs12733586*	chr1:45099817	A vs. G	All (C only)	13	60468	1.00 (0.96-1.05)	0.989	-	-	-	-	-	-	-	-
EIF2B3	rs12139143*	chr1:45122615	A vs. C	All (C only)	13	60807	1.00 (0.96-1.05)	0.949	-	-	-	-	-	-	-	-
EIF2B3	rs263977	chr1:45132874	G vs. T	All (C only)	5	4389	0.96 (0.87-1.04)	0.315	-	-	-	-	-	-	-	-
EIF2B3	rs263978	chr1:45135579	T vs. C	All (C only)	5	5507	0.99 (0.89-1.09)	0.812	-	-	-	-	-	-	-	-
EIF2B3	rs1022814	chr1:45186433	G vs. A	All (C only)	5	4369	1.03 (0.92-1.15)	0.581	-	-	-	-	-	-	-	-
EIF2B3	rs12405721	chr1:45187020	C vs. T	All (C only)	6	6076	1.02 (0.91-1.14)	0.717	-	-	-	-	-	-	-	-
EIF2B3	rs546354	chr1:45204251	C vs. T	All (C only)	5	4307	1.04 (0.93-1.17)	0.493	-	-	-	-	-	-	-	-
EIF2B3	rs566063	chr1:45223422	C vs. T	All (C only)	4	3816	0.92 (0.83-1.03)	0.143	-	-	-	-	-	-	-	-
EIF2B3	rs364482	chr1:45224064	A vs. G	All (C only)	4	7820	1.03 (0.93-1.13)	0.631	-	-	-	-	-	-	-	-
EIF2B3	rs489676	chr1:45224814	C vs. G	All (C only)	4	3685	0.99 (0.85-1.16)	0.919	-	-	-	-	-	-	-	-
CYP4X1	rs9728169	chr1:47296851	A vs. C	All (C only)	5	8147	0.97 (0.90-1.04)	0.391	-	-	-	-	-	-	-	-
LOC388630	rs564914	chr1:47687820	T vs. A	All (C only)	4	3717	1.00 (0.91-1.09)	0.923	-	-	-	-	-	-	-	-
LOC388630	rs2119102	chr1:48039227	A vs. C	All (C only)	5	4394	1.03 (0.94-1.13)	0.503	-	-	-	-	-	-	-	-
SKINT1	rs10788882	chr1:48403025	G vs. C	All (C only)	4	3718	1.06 (0.95-1.18)	0.292	-	-	-	-	-	-	-	-
SPATA6	rs1338314	chr1:48597942	A vs. G	All (C only)	4	3768	1.10 (0.86-1.41)	0.44	-	-	-	-	-	-	-	-
SPATA6	rs3738309	chr1:48641875	A vs. T	All (C only)	4	3938	0.91 (0.77-1.09)	0.304	-	-	-	-	-	-	-	-
SPATA6	rs2485911	chr1:48683563	A vs. G	All (C only)	4	3927	0.98 (0.85-1.14)	0.834	-	-	-	-	-	-	-	-
AGBL4	rs1994211	chr1:48827394	A vs. G	All (C only)	4	3475	0.97 (0.88-1.08)	0.576	-	-	-	-	-	-	-	-
AGBL4	rs12023224	chr1:48849298	T vs. C	All (C only)	5	4318	0.93 (0.85-1.02)	0.125	-	-	-	-	-	-	-	-
AGBL4	rs1999709	chr1:48879003	A vs. G	All (C only)	5	4370	0.97 (0.88-1.06)	0.451	-	-	-	-	-	-	-	-
AGBL4	rs4926747	chr1:48938447	C vs. T	All (C only)	4	7303	1.00 (0.92-1.08)	0.952	-	-	-	-	-	-	-	-
AGBL4	rs1934393	chr1:48981205	G vs. C	All (C only)	4	3877	1.00 (0.89-1.14)	0.945	-	-	-	-	-	-	-	-
AGBL4	rs10493136	chr1:48998724	A vs. G	All (C only)	5	4214	0.98 (0.86-1.11)	0.717	-	-	-	-	-	-	-	-
AGBL4	rs6664435	chr1:49011337	C vs. T	All (C only)	4	7641	1.00 (0.89-1.11)	0.949	-	-	-	-	-	-	-	-
AGBL4	rs12410172	chr1:49288375	C vs. G	All (C only)	4	3733	1.05 (0.86-1.28)	0.636	-	-	-	-	-	-	-	-
AGBL4	rs355206	chr1:49444761	A vs. C	All (C only)	4	3977	0.97 (0.88-1.07)	0.503	-	-	-	-	-	-	-	-
AGBL4	rs4408195	chr1:49900785	G vs. A	All (C only)	4	7680	1.03 (0.94-1.14)	0.53	-	-	-	-	-	-	-	-
FAF1	rs4313442	chr1:50230856	T vs. A	All (C only)	4	4018	0.98 (0.90-1.07)	0.658	-	-	-	-	-	-	-	-
ELAVL4	rs7520915	chr1:50328249	A vs. T	All (C only)	5	4583	0.95 (0.71-1.26)	0.703	-	-	-	-	-	-	-	-
ELAVL4	rs967582	chr1:50354759	G vs. T	All (C only)	5	8454	1.1 (0.97-1.24)	0.133	-	-	-	-	-	-	-	-
ELAVL4	rs3902720	chr1:50377924	C vs. T	All (C only)	6	9020	1.02 (0.89-1.16)	0.821	-	-	-	-	-	-	-	-
ELAVL4	rs12024093	chr1:50401438	A vs. G	All (C only)	4	4268	0.93 (0.79-1.09)	0.362	-	-	-	-	-	-	-	-
ELAVL4	rs3009113	chr1:50422286	C vs. T	All (C only)	5	4059	1.02 (0.93-1.13)	0.657	-	-	-	-	-	-	-	-
ELAVL4	rs2494876	chr1:50439102	T vs. C	All (C only)	5	4393	1.03 (0.87-1.21)	0.755	-	-	-	-	-	-	-	-
FAF1	rs3862271	chr1:50727584	C vs. T	All (C only)	4	4009	1.01 (0.92-1.12)	0.773	-	-	-	-	-	-	-	-
FAF1	rs11587750	chr1:50923331	A vs. G	All (C only)	4	4066	1.03 (0.93-1.13)	0.625	-	-	-	-	-	-	-	-
FAF1	rs1398868	chr1:51091934	G vs. A	All (C only)	4	4007	1.01 (0.92-1.12)	0.787	-	-	-	-	-	-	-	-
CDKN2C	rs1043141	chr1:51212365	T vs. C	All (C only)	4	3890	0.91 (0.78-1.07)	0.253	-	-	-	-	-	-	-	-
CDKN2C	rs11579642	chr1:51241140	T vs. C	All (C only)	5	5550	1.06 (0.98-1.15)	0.142	-	-	-	-	-	-	-	-
RNF11	rs7526029	chr1:51481371	G vs. A	All (C only)	6	6070	0.94 (0.83-1.07)	0.356	-	-	-	-	-	-	-	-
RNF11	rs12404033	chr1:51502642	G vs. C	All (C only)	5	5541	0.95 (0.87-1.04)	0.281	-	-	-	-	-	-	-	-
EPS15	rs7308	chr1:51593578	G vs. T	All (C only)	4	3849	1.03 (0.92-1.14)	0.637	-	-	-	-	-	-	-	-
EPS15	rs6694583	chr1:51736351	A vs. G	All (C only)	4	4008	1.06 (0.95-1.17)	0.293	-	-	-	-	-	-	-	-
OSBPL9	rs7522561*	chr1:51810790	C vs. T	All (C only)	10	24037	0.97 (0.89-1.07)	0.554	-	-	-	-	-	-	-	-
OSBPL9	rs10489546	chr1:51994302	C vs. T	All (C only)	4	3739	1.04 (0.86-1.25)	0.71	-	-	-	-	-	-	-	-
RAB3B	rs3765687	chr1:52174694	G vs. A	All (C only)	5	4422	1.03 (0.92-1.16)	0.569	-	-	-	-	-	-	-	-
RAB3B	rs7541308	chr1:52190709	G vs. T	All (C only)	4	4045	1.02 (0.89-1.16)	0.804	-	-	-	-	-	-	-	-
RAB3B	rs4926904	chr1:52199028	A vs. G	All (C only)	4	3749	0.99 (0.81-1.20)	0.878	-	-	-	-	-	-	-	-
KTI12	rs2809918	chr1:52270700	A vs. C	All (C only)	4	3705	0.93 (0.75-1.16)	0.52	-	-	-	-	-	-	-	-
TXNDC12	rs2783175	chr1:52271449	T vs. A	All (C only)	5	5410	1.04 (0.83-1.30)	0.751	-	-	-	-	-	-	-	-
ZFYVE9	rs10888748	chr1:52400877	A vs. G	All (C only)	4	3930	0.89 (0.77-1.03)	0.121	-	-	-	-	-	-	-	-
ZFYVE9	rs649676	chr1:52417470	C vs. T	All (C only)	4	7735	0.95 (0.82-1.10)	0.461	-	-	-	-	-	-	-	-
ZFYVE9	rs3790522*	chr1:52478015	C vs. T	All (C only)	10	27446	0.95 (0.88-1.02)	0.159	-	-	-	-	-	-	-	-
ZFYVE9	rs2762818	chr1:52571601	G vs. A	All (C only)	4	3921	0.88 (0.73-1.05)	0.15	-	-	-	-	-	-	-	-
ZCCHC11	rs2274147*	chr1:52673411	G vs. A	All (C only)	10	25597	0.95 (0.90-1.00)	0.0322	A	10417	A	0	C	Low OR, Regr	C	<1
ZCCHC11	rs2131553*	chr1:52699137	G vs. A	All (C only)	10	25627	0.95 (0.91-1.00)	0.0511	-	-	-	-	-	-	-	-
ZCCHC11	rs1493365*	chr1:52790033	A vs. G	All (C only)	11	27269	0.95 (0.91-1.00)	0.0316	A	11785	A	3	C	Low OR	C	<1
GPX7	rs3753753	chr1:52842102	C vs. G	All (C only)	4	3769	1.00 (0.77-1.29)	0.989	-	-	-	-	-	-	-	-
GPX7	rs1970951	chr1:52845042	T vs. C	All (C only)	5	5519	1.07 (0.88-1.31)	0.505	-	-	-	-	-	-	-	-
GPX7	rs1970949	chr1:52845384	G vs. C	All (C only)	4	3766	1.00 (0.78-1.29)	0.991	-	-	-	-	-	-	-	-
GPX7	rs946154	chr1:52845915	G vs. C	All (C only)	4	3772	1.04 (0.86-1.25)	0.718	-	-	-	-	-	-	-	-
FAM159A	rs2050695	chr1:52867574	C vs. T	All (C only)	4	7908	1.01 (0.95-1.09)	0.725	-	-	-	-	-	-	-	-
ZYG11B	rs6588441	chr1:52996082	A vs. G	All (C only)	5	5523	1.05 (0.98-1.14)	0.187	-	-	-	-	-	-	-	-
ECHDC2	rs511599	chr1:53135406	T vs. C	All (C only)	4	3819	1.13 (0.94-1.35)	0.184	-	-	-	-	-	-	-	-
SCP2	rs1242317	chr1:53187354	T vs. C	All (C only)	4	3791	1.10 (0.94-1.29)	0.221	-	-	-	-	-	-	-	-
SLC1A7	rs3766781	chr1:53351770	A vs. G	All (C only)	4	7565	1.03 (0.95-1.11)	0.458	-	-	-	-	-	-	-	-
SLC1A7	rs3766785	chr1:53354894	T vs. A	All (C only)	5	4114	1.06 (0.92-1.22)	0.431	-	-	-	-	-	-	-	-
SLC1A7	rs3766792	chr1:53363011	T vs. C	All (C only)	4	3724	0.99 (0.83-1.18)	0.904	-	-	-	-	-	-	-	-
CPT2	rs1288332	chr1:53403548	A vs. G	All (C only)	4	3806	1.00 (0.84-1.19)	0.995	-	-	-	-	-	-	-	-
LRP8	rs5174*	chr1:53485315	T vs. C	All (C only)	12	59965	0.99 (0.96-1.02)	0.387	-	-	-	-	-	-	-	-
LRP8	rs915191	chr1:53496083	G vs. A	All (C only)	4	3783	1.02 (0.86-1.22)	0.805	-	-	-	-	-	-	-	-
LRP8	rs1288489	chr1:53545132	G vs. C	All (C only)	5	4355	1.01 (0.93-1.11)	0.785	-	-	-	-	-	-	-	-
LRP8	rs6694764*	chr1:53556686	A vs. G	All (C only)	11	26858	1.03 (0.99-1.08)	0.128	-	-	-	-	-	-	-	-
LRP8	rs3820198	chr1:53565239	G vs. T	All (C only)	5	9434	1.06 (0.99-1.13)	0.105	-	-	-	-	-	-	-	-
LRP8	rs11578993	chr1:53617978	G vs. C	All (C only)	4	3683	0.99 (0.89-1.10)	0.84	-	-	-	-	-	-	-	-
GLIS1	rs734908	chr1:53716625	G vs. T	All (C only)	5	5606	1.01 (0.91-1.11)	0.908	-	-	-	-	-	-	-	-
GLIS1	rs496933	chr1:53781867	C vs. G	All (C only)	4	3821	1.03 (0.92-1.15)	0.66	-	-	-	-	-	-	-	-
GLIS1	rs7551844	chr1:53833921	T vs. C	All (C only)	4	7737	1.03 (0.93-1.14)	0.541	-	-	-	-	-	-	-	-
GLIS1	rs797906*	chr1:53963283	A vs. C	All (C only)	13	59866	1.05 (1.02-1.09)	0.00157	A	43510	A	0	C	Low OR	C	<1
TMEM48	rs3753420	chr1:54006803	C vs. T	All (C only)	4	3964	1.05 (0.91-1.20)	0.54	-	-	-	-	-	-	-	-
LRRC42	rs12073674	chr1:54187088	C vs. T	All (C only)	4	3909	1.02 (0.90-1.15)	0.775	-	-	-	-	-	-	-	-
LDLRAD1	rs10158824	chr1:54252986	C vs. G	All (C only)	4	3606	0.97 (0.88-1.06)	0.481	-	-	-	-	-	-	-	-
CDCP2	rs682705	chr1:54410005	C vs. T	All (C, A, O)	25	15577	0.95 (0.88-1.02)	0.154	-	-	-	-	-	-	-	-
CDCP2	rs682705	chr1:54410005	C vs. T	C	19	13659	0.96 (0.88-1.04)	0.274	-	-	-	-	-	-	-	-
CDCP2	rs7520966	chr1:54417850	T vs. C	All (C, A, O)	24	19168	0.95 (0.88-1.03)	0.198	-	-	-	-	-	-	-	-
CDCP2	rs7520966	chr1:54417850	T vs. C	C	18	17240	0.96 (0.89-1.05)	0.371	-	-	-	-	-	-	-	-
SSBP3	rs2018903	chr1:54531693	C vs. G	All (C only)	4	3766	0.99 (0.90-1.09)	0.857	-	-	-	-	-	-	-	-
SSBP3	rs6695534	chr1:54543497	A vs. C	All (C only)	4	7892	1.02 (0.95-1.09)	0.637	-	-	-	-	-	-	-	-
SSBP3	rs12759166	chr1:54563262	G vs. A	All (C only)	4	3500	1.00 (0.83-1.21)	0.981	-	-	-	-	-	-	-	-
SSBP3	rs213498	chr1:54639762	A vs. T	All (C only)	5	5341	0.98 (0.90-1.07)	0.664	-	-	-	-	-	-	-	-
ACOT11	rs300268*	chr1:54819034	G vs. A	All (C only)	11	26946	0.98 (0.94-1.02)	0.295	-	-	-	-	-	-	-	-
C1orf175	rs580851	chr1:54918769	C vs. A	All (C only)	4	3071	1.05 (0.93-1.18)	0.421	-	-	-	-	-	-	-	-
C1orf175	rs644955	chr1:54940672	T vs. C	All (C only)	4	7687	0.99 (0.90-1.09)	0.902	-	-	-	-	-	-	-	-
TTC4	rs12038851	chr1:54988716	C vs. T	All (C only)	4	3559	0.99 (0.89-1.09)	0.764	-	-	-	-	-	-	-	-
TTC22	rs1147984	chr1:55039433	C vs. T	All (C only)	4	3446	1.04 (0.91-1.18)	0.571	-	-	-	-	-	-	-	-
DHCR24	rs8990	chr1:55089006	T vs. C	All (C only)	5	5510	0.95 (0.75-1.20)	0.66	-	-	-	-	-	-	-	-
DHCR24	rs638944	chr1:55114503	T vs. G	All (C only)	5	4184	1.03 (0.88-1.21)	0.736	-	-	-	-	-	-	-	-
TMEM61	rs1863668*	chr1:55184296	T vs. G	All (C only)	12	60010	1.03 (0.98-1.08)	0.23	-	-	-	-	-	-	-	-
TMEM61	rs2433675	chr1:55220641	G vs. C	All (C only)	4	3443	1.07 (0.95-1.21)	0.258	-	-	-	-	-	-	-	-
PCSK9	rs1165287	chr1:55292800	G vs. A	All (C only)	4	2863	0.99 (0.87-1.12)	0.822	-	-	-	-	-	-	-	-
USP24	rs13312*	chr1:55305330	G vs. C	All (C only)	14	61531	0.98 (0.93-1.02)	0.325	-	-	-	-	-	-	-	-
USP24	rs1043671	chr1:55306399	G vs. A	All (C only)	4	3731	0.89 (0.71-1.11)	0.301	-	-	-	-	-	-	-	-
USP24	rs487230	chr1:55313762	T vs. C	All (C, A)	7	10920	0.91 (0.82-1.02)	0.106	-	-	-	-	-	-	-	-
USP24	rs487230	chr1:55313762	T vs. C	C	6	9885	0.92 (0.82-1.04)	0.199	-	-	-	-	-	-	-	-
USP24	rs683880	chr1:55319483	T vs. C	All (C only)	5	4422	0.97 (0.87-1.08)	0.549	-	-	-	-	-	-	-	-
USP24	rs615652	chr1:55339998	T vs. C	All (C only)	4	3854	0.94 (0.83-1.06)	0.284	-	-	-	-	-	-	-	-
USP24	rs1165226*	chr1:55380593	G vs. A	All (C only)	14	62010	0.98 (0.95-1.01)	0.155	-	-	-	-	-	-	-	-
USP24	rs287235	chr1:55451087	G vs. C	All (C only)	13	60864	0.98 (0.93-1.04)	0.509	-	-	-	-	-	-	-	-
PARK7	rs3766606	chr1:7944784	T vs. G	All (C only)	4	4542	1.11 (0.88-1.38)	0.376	-	-	-	-	-	-	-	-
PARK7	rs178932	chr1:7952887	G vs. A	All (C only)	4	8462	0.97 (0.91-1.05)	0.468	-	-	-	-	-	-	-	-
PARK7	rs225092	chr1:7958662	G vs. C	All (C, A)	4	3943	1.52 (0.85-2.70)	0.154	-	-	-	-	-	-	-	-
PARK7	rs225092	chr1:7958662	G vs. C	C	3	3607	0.98 (0.89-1.08)	0.657	-	-	-	-	-	-	-	-
PARK7	rs161801	chr1:7965323	A vs. G	All (C only)	4	4226	1.01 (0.92-1.10)	0.828	-	-	-	-	-	-	-	-
PARK7	rs161802	chr1:7965413	T vs. G	All (C, A)	5	4672	0.99 (0.89-1.10)	0.79	-	-	-	-	-	-	-	-
PARK7	rs161802	chr1:7965413	T vs. G	C	4	4292	0.99 (0.88-1.11)	0.866	-	-	-	-	-	-	-	-
IL1A	rs1800587	chr2:113259431	T vs. C	All (C, A, O)	13	8136	0.96 (0.87-1.06)	0.386	-	-	-	-	-	-	-	-
IL1A	rs1800587	chr2:113259431	T vs. C	A	3	2178	0.90 (0.67-1.20)	0.466	-	-	-	-	-	-	-	-
IL1A	rs1800587	chr2:113259431	T vs. C	C	9	5595	0.99 (0.88-1.11)	0.809	-	-	-	-	-	-	-	-
IL1B	rs1143634*	chr2:113306861	T vs. C	All (C, A, O)	12	59695	0.96 (0.92-1.01)	0.0891	-	-	-	-	-	-	-	-
IL1B	rs1143634*	chr2:113306861	T vs. C	C	10	59098	0.96 (0.92-1.01)	0.109	-	-	-	-	-	-	-	-
IL1B	rs16944*	chr2:113311338	T vs. C	All (C, A)	12	59492	1.07 (1.03-1.10)	0.000273	A	39889	A	5	C	Low OR, Regr	C	1.6
IL1B	rs16944*	chr2:113311338	T vs. C	C	11	59112	1.07 (1.03-1.11)	0.000455	A	39534	A	12	C	Low OR, Regr	C	1.4
EN1	rs1438852	chr2:119312561	C vs. T	All (C only)	4	4855	0.93 (0.84-1.02)	0.125	-	-	-	-	-	-	-	-
EN1	rs4144782	chr2:119318342	G vs. A	All (C only)	5	6207	0.96 (0.86-1.07)	0.431	-	-	-	-	-	-	-	-
EN1	rs893572	chr2:119323940	T vs. G	All (C only)	5	5394	0.94 (0.81-1.09)	0.401	-	-	-	-	-	-	-	-
ACMSD/TMEM163	rs621341*	chr2:135011650	T vs. C	All (C only)	11	62696	1.09 (1.04-1.14)	0.000384	A	52212	B	49	C	Low OR	C	1.5
ACMSD/TMEM163	rs10928513*	chr2:135173229	C vs. T	All (C only)	25	43973	1.08 (1.03-1.13)	0.00109	A	42469	C	53	C	Low OR	C	1.1
ACMSD/TMEM163	rs6723108*	chr2:135196450	T vs. G	All (C only)	11	66769	0.91 (0.87-0.95)	7.02e-06	A	59968	B	46	C	Low OR	C	3.1
ACMSD/TMEM163	rs6710823*	chr2:135308851	A vs. G	All (C only)	6	15482	1.35 (1.18-1.55)	1.91e-05	A	5992	B	49	A	-	B	2.7
ACMSD/TMEM163	rs6729702*	chr2:135318626	A vs. G	All (C only)	10	58611	0.93 (0.89-0.98)	0.00269	A	48393	B	45	C	Low OR	C	<1
ACMSD/TMEM163	rs6430552*	chr2:135339278	T vs. C	All (C only)	10	58762	0.93 (0.89-0.98)	0.0027	A	48878	B	42	C	Low OR	C	<1
ACMSD/TMEM163	rs6714498*	chr2:135367236	C vs. T	All (C only)	10	58311	0.93 (0.89-0.98)	0.00227	A	47877	B	41	C	Low OR	C	<1
CXCR4	rs4954564	chr2:136611978	G vs. A	All (C only)	4	12114	0.92 (0.83-1.02)	0.113	-	-	-	-	-	-	-	-
CXCR4	rs6430612	chr2:136722668	C vs. T	All (C only)	4	16319	0.94 (0.86-1.02)	0.155	-	-	-	-	-	-	-	-
CXCR4	rs10221893*	chr2:136730076	C vs. T	All (C only)	10	59079	0.94 (0.90-0.98)	0.00262	A	50558	B	39	C	Low OR	C	<1
HNMT	rs11558538	chr2:138476119	T vs. C	All (C only)	4	3846	0.85 (0.63-1.15)	0.295	-	-	-	-	-	-	-	-
NR4A2	rs12803*	chr2:156890171	T vs. G	C	11	59415	1.03 (0.98-1.08)	0.211	-	-	-	-	-	-	-	-
NR4A2	rs12803*	chr2:156890171	T vs. G	All (C, A)	12	59796	1.03 (0.98-1.07)	0.232	-	-	-	-	-	-	-	-
NR4A2	rs7562656	chr2:156890875	A vs. G	All (C, A, O)	5	3774	1.10 (0.83-1.45)	0.519	-	-	-	-	-	-	-	-
NR4A2	rs7562656	chr2:156890875	A vs. G	C	3	3290	1.08 (0.82-1.44)	0.582	-	-	-	-	-	-	-	-
NR4A2	rs35479735	chr2:156891460	ins vs. del	All (C, A, O)	8	4223	1.06 (0.90-1.24)	0.481	-	-	-	-	-	-	-	-
NR4A2	rs35479735	chr2:156891460	ins vs. del	C	4	2501	0.97 (0.82-1.15)	0.729	-	-	-	-	-	-	-	-
NR4A2	rs834835*	chr2:156896391	C vs. T	C	11	59338	1.01 (0.96-1.06)	0.836	-	-	-	-	-	-	-	-
NR4A2	rs834835*	chr2:156896391	C vs. T	All (C, A)	12	59719	1.00 (0.96-1.05)	0.891	-	-	-	-	-	-	-	-
GALNT3	rs16851009	chr2:166338953	T vs. C	C	18	14326	1.02 (0.92-1.14)	0.688	-	-	-	-	-	-	-	-
GALNT3	rs16851009	chr2:166338953	T vs. C	All (C, A, O)	24	16252	0.99 (0.90-1.09)	0.832	-	-	-	-	-	-	-	-
STK39	rs2390669*	chr2:168800188	C vs. A	All (C only)	14	35159	1.19 (1.12-1.25)	1.37e-09	A	8961	n.a.	18	n.a.	-	A	6.7
STK39	rs2102808*	chr2:168825271	T vs. G	C	20	34830	1.22 (1.13-1.31)	9.97e-08	A	8258	n.a.	40	n.a.	-	A	4.9
STK39	rs2102808*	chr2:168825271	T vs. G	All (C, A)	23	35762	1.21 (1.12-1.30)	3.57e-07	A	8829	B	43	A	-	B	4.4
STK39	rs2102808*	chr2:168825271	T vs. G	A	3	932	1.15 (0.80-1.65)	0.462	-	-	-	-	-	-	-	-
NFE2L2	rs2706112	chr2:177798107	C vs. T	C	3	3537	1.00 (0.88-1.12)	0.934	-	-	-	-	-	-	-	-
NFE2L2	rs2706112	chr2:177798107	C vs. T	All (C, A)	4	3917	1.00 (0.89-1.11)	0.94	-	-	-	-	-	-	-	-
NFE2L2	rs13035806	chr2:177800068	T vs. C	All (C only)	4	3666	1.03 (0.88-1.19)	0.731	-	-	-	-	-	-	-	-
NFE2L2	rs2706110	chr2:177800408	A vs. G	All (C only)	5	4311	1.04 (0.89-1.20)	0.645	-	-	-	-	-	-	-	-
NFE2L2	rs10183914*	chr2:177805912	A vs. G	All (C only)	12	27366	0.97 (0.92-1.02)	0.293	-	-	-	-	-	-	-	-
NFE2L2	rs2001350	chr2:177808671	G vs. A	All (C only)	4	7731	1.07 (0.87-1.31)	0.528	-	-	-	-	-	-	-	-
NFE2L2	rs1806649*	chr2:177826398	A vs. G	All (C only)	12	59583	0.99 (0.95-1.03)	0.638	-	-	-	-	-	-	-	-
NFE2L2	rs2886161	chr2:177836085	C vs. T	All (C, A)	5	4224	1.02 (0.90-1.15)	0.779	-	-	-	-	-	-	-	-
NFE2L2	rs2886161	chr2:177836085	C vs. T	C	4	3843	1.01 (0.87-1.17)	0.872	-	-	-	-	-	-	-	-
NFE2L2	rs6721961	chr2:177838283	A vs. C	All (C only)	4	3759	1.11 (0.94-1.30)	0.229	-	-	-	-	-	-	-	-
NFE2L2	rs6706649	chr2:177838317	A vs. G	All (C only)	4	3057	1.03 (0.86-1.23)	0.749	-	-	-	-	-	-	-	-
NFE2L2	rs35652124	chr2:177838319	G vs. A	All (C only)	4	3868	1.02 (0.88-1.18)	0.82	-	-	-	-	-	-	-	-
NFE2L2	rs7557529	chr2:177843343	A vs. G	All (C only)	4	3819	1.06 (0.93-1.21)	0.381	-	-	-	-	-	-	-	-
NFE2L2	rs16865105	chr2:177844875	G vs. T	All (C only)	4	3542	1.03 (0.91-1.18)	0.603	-	-	-	-	-	-	-	-
BDNF	rs2030224	chr2:194741003	C vs. T	All (C only)	4	2822	0.92 (0.77-1.12)	0.41	-	-	-	-	-	-	-	-
APOB	rs1042031	chr2:21079258	A vs. G	All (C only)	4	7571	1.04 (0.87-1.25)	0.658	-	-	-	-	-	-	-	-
GWA_2q35	rs6741233*	chr2:216463846	T vs. C	All (C only)	10	58586	0.94 (0.85-1.04)	0.201	-	-	-	-	-	-	-	-
EPHA4	rs13386128	chr2:221993609	C vs. G	All (C only)	4	4030	1.13 (0.95-1.35)	0.164	-	-	-	-	-	-	-	-
GWA_2q36.3	rs10200894*	chr2:228525376	G vs. C	C	25	66968	0.89 (0.84-0.96)	0.00108	A	13197	B	31	C	Low OR	C	1.2
GWA_2q36.3	rs10200894*	chr2:228525376	G vs. C	All (C, A, O)	31	68892	0.91 (0.86-0.97)	0.00557	A	14007	B	29	C	Low OR	C	<1
TRIP12	rs1035833	chr2:230417442	C vs. T	All (C only)	4	15702	1.09 (0.98-1.22)	0.116	-	-	-	-	-	-	-	-
TRIP12	rs9288651*	chr2:230439641	T vs. C	All (C only)	12	67364	1.03 (0.99-1.07)	0.139	-	-	-	-	-	-	-	-
GIGYF2	rs2289912	chr2:233367797	A vs. C	C	6	5589	0.93 (0.72-1.20)	0.573	-	-	-	-	-	-	-	-
GIGYF2	rs2289912	chr2:233367797	A vs. C	All (C, A)	7	6580	0.99 (0.83-1.18)	0.918	-	-	-	-	-	-	-	-
GIGYF2	rs2305138	chr2:233369090	A vs. G	All (C, A)	5	4027	0.98 (0.75-1.28)	0.884	-	-	-	-	-	-	-	-
GIGYF2	rs2305138	chr2:233369090	A vs. G	C	4	3919	1.01 (0.79-1.29)	0.916	-	-	-	-	-	-	-	-
GIGYF2	rs3816334	chr2:233417050	A vs. G	All (C, A)	5	4090	1.01 (0.92-1.11)	0.811	-	-	-	-	-	-	-	-
GIGYF2	rs3816334	chr2:233417050	A vs. G	C	4	3982	1.01 (0.92-1.11)	0.849	-	-	-	-	-	-	-	-
GIGYF2	rs7563724	chr2:233420471	G vs. A	C	4	3902	0.97 (0.87-1.08)	0.584	-	-	-	-	-	-	-	-
GIGYF2	rs7563724	chr2:233420471	G vs. A	All (C, A)	5	4010	0.98 (0.88-1.09)	0.708	-	-	-	-	-	-	-	-
GIGYF2	rs12328151	chr2:233420492	A vs. G	C	4	3928	1.06 (0.95-1.18)	0.273	-	-	-	-	-	-	-	-
GIGYF2	rs12328151	chr2:233420492	A vs. G	All (C, A)	5	4036	1.06 (0.95-1.18)	0.288	-	-	-	-	-	-	-	-
TGFA	rs3771473	chr2:70623105	A vs. G	C	3	3594	1.02 (0.93-1.13)	0.67	-	-	-	-	-	-	-	-
TGFA	rs3771473	chr2:70623105	A vs. G	All (C, A)	4	3974	0.99 (0.89-1.10)	0.83	-	-	-	-	-	-	-	-
SPR	rs1876488*	chr2:72923481	T vs. G	All (C only)	11	59143	1.00 (0.95-1.05)	0.995	-	-	-	-	-	-	-	-
SPR	rs1396107*	chr2:72930093	T vs. C	All (C only)	11	59016	1.01 (0.97-1.04)	0.631	-	-	-	-	-	-	-	-
SPR	rs6730083	chr2:72969505	G vs. A	All (C only)	4	4997	1.10 (0.91-1.33)	0.323	-	-	-	-	-	-	-	-
SPR	rs4852903	chr2:72985493	C vs. G	All (C only)	4	4334	1.02 (0.91-1.14)	0.752	-	-	-	-	-	-	-	-
HTRA2	rs10779958	chr2:74609286	C vs. A	All (C only)	16	15630	1.00 (0.93-1.08)	0.95	-	-	-	-	-	-	-	-
HTRA2	rs2231250	chr2:74609684	C vs. G	All (C only)	17	13062	1.00 (0.93-1.08)	0.982	-	-	-	-	-	-	-	-
HTRA2	rs1183739	chr2:74610056	C vs. G	All (C only)	15	11609	0.95 (0.87-1.04)	0.261	-	-	-	-	-	-	-	-
HTRA2	rs72470544	chr2:74611062	T vs. G	All (C only)	15	9978	1.03 (0.82-1.30)	0.782	-	-	-	-	-	-	-	-
HTRA2	rs2241028	chr2:74612442	A vs. G	All (C only)	15	14809	0.92 (0.83-1.02)	0.121	-	-	-	-	-	-	-	-
TACR1	rs4439987	chr2:75140614	G vs. A	All (C only)	4	10156	1.01 (0.84-1.21)	0.916	-	-	-	-	-	-	-	-
GWA_3q13.3	rs1881925	chr3:110444079	C vs. T	All (C only)	4	15317	0.98 (0.84-1.14)	0.802	-	-	-	-	-	-	-	-
DRD3	rs2134655	chr3:115340891	A vs. G	All (C, A)	4	7907	1.02 (0.94-1.10)	0.707	-	-	-	-	-	-	-	-
DRD3	rs2134655	chr3:115340891	A vs. G	C	3	7527	1.00 (0.92-1.08)	0.999	-	-	-	-	-	-	-	-
DRD3	rs6280*	chr3:115373505	G vs. A	All (C, A, O)	17	62902	1.03 (0.99-1.07)	0.226	-	-	-	-	-	-	-	-
DRD3	rs6280*	chr3:115373505	G vs. A	C	10	59405	1.03 (0.98-1.08)	0.315	-	-	-	-	-	-	-	-
DRD3	rs6280	chr3:115373505	G vs. A	A	4	1725	1.07 (0.93-1.25)	0.345	-	-	-	-	-	-	-	-
DRD3	rs324026	chr3:115373732	C vs. T	All (C, O)	4	4084	1.01 (0.87-1.16)	0.94	-	-	-	-	-	-	-	-
DRD3	rs1503670	chr3:115381997	G vs. A	All (C, O)	4	4076	0.99 (0.90-1.09)	0.836	-	-	-	-	-	-	-	-
GSK3B	rs6438552	chr3:121114504	C vs. T	All (C, A, O)	11	14480	1.03 (0.95-1.13)	0.445	-	-	-	-	-	-	-	-
GSK3B	rs6438552	chr3:121114504	C vs. T	C	9	13393	1.00 (0.92-1.09)	0.923	-	-	-	-	-	-	-	-
GSK3B	rs16830689	chr3:121253961	C vs. G	All (C, A)	5	4750	0.98 (0.79-1.22)	0.861	-	-	-	-	-	-	-	-
GSK3B	rs16830689	chr3:121253961	C vs. G	C	4	4031	1.00 (0.78-1.28)	0.97	-	-	-	-	-	-	-	-
GSK3B	rs334558	chr3:121295972	C vs. T	C	9	9395	0.99 (0.90-1.08)	0.731	-	-	-	-	-	-	-	-
GSK3B	rs334558	chr3:121295972	C vs. T	All (C, A, O)	11	10482	1.01 (0.93-1.10)	0.797	-	-	-	-	-	-	-	-
SEC61A1	rs2075402	chr3:129266952	A vs. G	C	3	3807	0.98 (0.89-1.08)	0.685	-	-	-	-	-	-	-	-
SEC61A1	rs2075402	chr3:129266952	A vs. G	All (C, A)	4	4187	0.99 (0.90-1.08)	0.805	-	-	-	-	-	-	-	-
TF	rs1799899	chr3:134958502	A vs. G	All (C only)	5	3807	0.86 (0.70-1.06)	0.161	-	-	-	-	-	-	-	-
EPHB1	rs2030737	chr3:136292067	C vs. T	All (C, A)	5	8860	0.98 (0.89-1.07)	0.627	-	-	-	-	-	-	-	-
EPHB1	rs2030737	chr3:136292067	C vs. T	C	4	8006	1.01 (0.94-1.08)	0.771	-	-	-	-	-	-	-	-
MRAS	rs4678260	chr3:139572203	C vs. T	All (C, A)	6	5586	1.08 (0.96-1.22)	0.216	-	-	-	-	-	-	-	-
MRAS	rs4678260	chr3:139572203	C vs. T	C	5	4831	1.09 (0.95-1.26)	0.232	-	-	-	-	-	-	-	-
BCHE	rs1803274	chr3:166973974	A vs. G	All (C only)	4	3358	1.04 (0.92-1.17)	0.521	-	-	-	-	-	-	-	-
MCCC1	rs11711441*	chr3:184303969	A vs. G	All (C, A)	29	47937	0.86 (0.82-0.90)	2.45e-10	A	13796	n.a.	19	n.a.	-	A	7.4
MCCC1	rs11711441*	chr3:184303969	A vs. G	C	25	46502	0.86 (0.82-0.91)	9.2e-10	A	13126	n.a.	18	n.a.	-	A	6.8
MCCC1	rs11711441*	chr3:184303969	A vs. G	A	4	1434	0.81 (0.63-1.04)	0.102	-	-	-	-	-	-	-	-
TPRG1	rs1000291*	chr3:190465502	C vs. T	All (C, A)	20	64726	1.05 (1.00-1.10)	0.0597	-	-	-	-	-	-	-	-
TPRG1	rs1000291*	chr3:190465502	C vs. T	C	19	64323	1.04 (0.99-1.09)	0.0964	-	-	-	-	-	-	-	-
TFRC	rs3817672	chr3:197285208	G vs. A	All (C only)	4	7468	0.97 (0.90-1.04)	0.328	-	-	-	-	-	-	-	-
GWA_3p24.1	rs9310867*	chr3:28665593	A vs. G	All (C only)	10	58554	1.07 (1.04-1.10)	2.78e-05	A	55976	A	0	C	Low OR	C	2.4
GWA_3p24.1	rs7617877*	chr3:28680768	A vs. G	All (C only)	10	58431	1.08 (1.03-1.13)	0.00299	A	42440	B	48	C	Low OR	C	<1
VIPR1	rs735773	chr3:42529795	G vs. C	C	3	3499	0.98 (0.85-1.14)	0.827	-	-	-	-	-	-	-	-
VIPR1	rs735773	chr3:42529795	G vs. C	All (C, A)	4	3879	0.99 (0.87-1.13)	0.897	-	-	-	-	-	-	-	-
GWA_3p22.1	rs7646966	chr3:43275875	C vs. A	All (C only)	5	17197	0.96 (0.83-1.11)	0.565	-	-	-	-	-	-	-	-
GWA_3p22.1	rs1320163	chr3:43278300	A vs. G	All (C only)	5	17068	0.96 (0.82-1.11)	0.543	-	-	-	-	-	-	-	-
CCR2	rs1799864	chr3:46374212	A vs. G	C	3	2972	1.12 (0.93-1.34)	0.232	-	-	-	-	-	-	-	-
CCR2	rs1799864	chr3:46374212	A vs. G	All (C, A)	4	3483	1.06 (0.91-1.24)	0.481	-	-	-	-	-	-	-	-
GWA_3p13	rs13076171	chr3:71988841	G vs. A	All (C only)	4	14529	0.99 (0.88-1.12)	0.847	-	-	-	-	-	-	-	-
ADH1C	rs1693482	chr4:100482988	A vs. G	All (C only)	4	3890	0.99 (0.90-1.08)	0.769	-	-	-	-	-	-	-	-
PPP3CA	rs2044041	chr4:102454392	A vs. T	C	5	4153	1.08 (0.93-1.26)	0.302	-	-	-	-	-	-	-	-
PPP3CA	rs2044041	chr4:102454392	A vs. T	All (C, A)	6	4910	1.07 (0.93-1.21)	0.346	-	-	-	-	-	-	-	-
IL2	rs2069762	chr4:123597430	G vs. T	All (C only)	4	3718	0.99 (0.89-1.09)	0.772	-	-	-	-	-	-	-	-
FGF2	rs308418	chr4:123987713	G vs. A	All (C, A)	4	6340	0.92 (0.78-1.09)	0.327	-	-	-	-	-	-	-	-
GWA_4q28.1	rs11737074*	chr4:125300823	A vs. G	All (C, A, O)	32	71211	1.04 (1.01-1.08)	0.0263	A	29774	A	6	C	Low OR, F, Regr	C	<1
GWA_4q28.1	rs11737074*	chr4:125300823	A vs. G	C	26	69279	1.03 (1.00-1.07)	0.0732	-	-	-	-	-	-	-	-
GWA_4q28.3	rs1509269	chr4:138973174	T vs. C	C	19	15117	1.03 (0.92-1.15)	0.646	-	-	-	-	-	-	-	-
GWA_4q28.3	rs1509269	chr4:138973174	T vs. C	All (C, A, O)	25	17044	0.99 (0.89-1.10)	0.872	-	-	-	-	-	-	-	-
GWA_4q28.3	rs2313982	chr4:139007510	A vs. G	All (C, A, O)	25	20710	0.96 (0.86-1.06)	0.387	-	-	-	-	-	-	-	-
GWA_4q28.3	rs2313982	chr4:139007510	A vs. G	C	18	18374	0.99 (0.89-1.11)	0.879	-	-	-	-	-	-	-	-
PITX3	rs1440416	chr4:144374485	T vs. C	All (C only)	4	4407	1.01 (0.93-1.11)	0.754	-	-	-	-	-	-	-	-
BST1	rs3213710*	chr4:15326419	G vs. A	All (C only)	10	60020	0.89 (0.85-0.92)	3.81e-08	A	56507	n.a.	44	n.a.	Low OR	A	5.3
BST1	rs11931532	chr4:15334864	C vs. T	A	5	22864	0.83 (0.78-0.88)	1.03e-09	A	19609	n.a.	0	n.a.	-	A	6.8
BST1	rs11931532*	chr4:15334864	C vs. T	All (C, A)	13	80178	0.86 (0.81-0.90)	1.1e-08	A	29677	n.a.	8	n.a.	Regr	A	5.8
BST1	rs11931532*	chr4:15334864	C vs. T	C	8	57314	0.90 (0.83-0.99)	0.0278	A	3558	A	0	C	Low OR	C	<1
BST1	rs11944132	chr4:15335012	A vs. G	All (C only)	4	7091	1.12 (0.92-1.37)	0.263	-	-	-	-	-	-	-	-
BST1	rs12502586*	chr4:15335662	A vs. G	All (C only)	9	54527	1.11 (1.02-1.21)	0.0127	A	14405	C	52	C	Low OR	C	<1
BST1	rs12645693	chr4:15338632	A vs. G	A	3	20391	0.81 (0.76-0.87)	3.14e-09	A	17145	n.a.	0	n.a.	-	A	6.3
BST1	rs12645693*	chr4:15338632	A vs. G	All (C, A)	11	79903	0.85 (0.80-0.90)	2.05e-07	A	26717	A	11	A	-	A	4.6
BST1	rs12645693*	chr4:15338632	A vs. G	C	8	59512	0.91 (0.83-1.00)	0.0524	-	-	-	-	-	-	-	-
BST1	rs11724635*	chr4:15346199	C vs. A	All (C, A)	29	47806	0.87 (0.84-0.91)	5.96e-11	A	41423	n.a.	46	n.a.	Low OR	A	7.9
BST1	rs11724635*	chr4:15346199	C vs. A	C	26	46586	0.88 (0.84-0.91)	1.87e-10	A	40032	n.a.	43	n.a.	Low OR	A	7.5
BST1	rs11724635*	chr4:15346199	C vs. A	A	3	1220	0.79 (0.61-1.04)	0.0903	-	-	-	-	-	-	-	-
BST1	rs4698412*	chr4:15346446	G vs. A	All (C, A)	15	84661	0.87 (0.84-0.90)	5.66e-15	A	83424	n.a.	38	n.a.	-	A	11.8
BST1	rs4698412*	chr4:15346446	G vs. A	C	11	63148	0.88 (0.84-0.92)	7.14e-10	A	55585	n.a.	43	n.a.	Low OR	A	6.9
BST1	rs4698412	chr4:15346446	G vs. A	A	4	21513	0.82 (0.77-0.87)	2.15e-09	A	15187	n.a.	0	n.a.	Regr	A	6.5
BST1	rs4538475	chr4:15347035	G vs. A	A	3	20393	0.80 (0.75-0.86)	9.53e-10	A	15523	n.a.	0	n.a.	-	A	6.8
BST1	rs4538475*	chr4:15347035	G vs. A	All (C, A)	14	80991	0.89 (0.84-0.93)	1.28e-06	A	44795	B	40	C	Low OR	C	3.9
BST1	rs4538475*	chr4:15347035	G vs. A	C	11	60598	0.91 (0.87-0.96)	0.000324	A	19532	A	21	C	Low OR	C	1.6
BST1	rs12646913*	chr4:15348374	G vs. A	All (C only)	10	60517	0.87 (0.81-0.92)	7.17e-06	A	9457	A	11	A	-	A	3.2
GWA_4q34.1	rs2612655	chr4:175730164	G vs. A	All (C only)	4	10215	0.91 (0.79-1.04)	0.156	-	-	-	-	-	-	-	-
UCHL1	rs5030732*	chr4:40954390	A vs. C	All (C, A, O)	25	38272	0.94 (0.91-0.98)	0.00389	A	20564	A	9	C	Low OR	C	<1
UCHL1	rs5030732*	chr4:40954390	A vs. C	C	13	27954	0.94 (0.90-0.99)	0.0136	A	10094	A	0	C	Low OR	C	<1
UCHL1	rs5030732	chr4:40954390	A vs. C	A	11	10090	0.94 (0.87-1.01)	0.086	-	-	-	-	-	-	-	-
UCHL1	rs2060915	chr4:40956257	C vs. T	All (C only)	4	4533	0.92 (0.77-1.10)	0.34	-	-	-	-	-	-	-	-
UCHL1	rs10517002	chr4:40959306	C vs. A	All (C only)	4	4598	1.03 (0.86-1.22)	0.775	-	-	-	-	-	-	-	-
IL8	rs4073	chr4:74824888	A vs. T	All (C only)	4	3794	1.07 (0.97-1.17)	0.177	-	-	-	-	-	-	-	-
PCGF3	rs7336	chr4:750258	A vs. C	All (C only)	4	9842	0.98 (0.91-1.05)	0.54	-	-	-	-	-	-	-	-
CPLX1	rs9328757*	chr4:799593	A vs. G	All (C only)	11	60166	0.95 (0.92-0.98)	0.00283	A	42395	A	11	C	Low OR	C	<1
GAK	rs1564282*	chr4:842313	T vs. C	All (C only)	11	58319	1.23 (1.15-1.31)	2.22e-09	A	12626	n.a.	34	n.a.	-	A	6.5
GAK	rs11248051*	chr4:848332	T vs. C	All (C only)	10	28786	1.20 (1.11-1.30)	3.05e-06	A	5968	B	42	A	-	B	3.6
GWA_4q21.23	rs4082474	chr4:84867548	A vs. C	All (C only)	4	16939	0.97 (0.86-1.09)	0.573	-	-	-	-	-	-	-	-
GWA_4q21.23	rs6821747	chr4:84871959	G vs. A	All (C only)	4	12676	0.97 (0.85-1.11)	0.643	-	-	-	-	-	-	-	-
GWA_4q21.23	rs4235064	chr4:84873278	A vs. G	All (C only)	4	16667	0.96 (0.85-1.09)	0.526	-	-	-	-	-	-	-	-
GAK	rs764324	chr4:857866	G vs. A	All (C only)	4	9595	0.98 (0.91-1.05)	0.586	-	-	-	-	-	-	-	-
GAK	rs17165156	chr4:889143	A vs. G	All (C only)	4	5579	0.95 (0.74-1.21)	0.651	-	-	-	-	-	-	-	-
SNCA	rs1390280	chr4:90738475	T vs. C	C	3	7857	1.08 (0.93-1.26)	0.333	-	-	-	-	-	-	-	-
SNCA	rs1390280	chr4:90738475	T vs. C	All (C, A)	4	9657	0.98 (0.78-1.24)	0.885	-	-	-	-	-	-	-	-
SNCA	rs3733449	chr4:90791345	T vs. C	C	3	7839	1.09 (0.95-1.25)	0.207	-	-	-	-	-	-	-	-
SNCA	rs3733449	chr4:90791345	T vs. C	All (C, A)	4	9632	0.99 (0.79-1.24)	0.912	-	-	-	-	-	-	-	-
SNCA	rs12644119	chr4:90822442	A vs. C	All (C only)	4	17414	1.20 (1.12-1.28)	5.74e-07	A	14315	A	0	A	-	A	4.2
SNCA	rs356229	chr4:90825620	G vs. A	All (C only)	4	15558	1.19 (1.13-1.25)	5.56e-12	A	14758	n.a.	0	n.a.	-	A	9
SNCA	rs356169	chr4:90851791	C vs. A	All (C only)	4	4634	1.18 (1.08-1.29)	0.000205	A	3452	A	0	A	-	A	1.9
SNCA	rs181489	chr4:90854043	T vs. C	All (C only)	18	12439	1.25 (1.16-1.35)	6.59e-09	A	8132	n.a.	40	n.a.	-	A	6
SNCA	rs356219*	chr4:90856624	G vs. A	All (C, A)	35	81774	1.30 (1.26-1.34)	2.51e-66	A	68150	n.a.	18	n.a.	-	A	62.4
SNCA	rs356219*	chr4:90856624	G vs. A	C	31	79494	1.29 (1.25-1.33)	6.06e-65	A	65576	n.a.	16	n.a.	-	A	61
SNCA	rs356219*	chr4:90856624	G vs. A	A	4	2281	1.33 (1.11-1.59)	0.0016	A	1987	B	34	A	-	B	1.1
SNCA	rs11931074	chr4:90858538	T vs. G	All (C, A)	25	58088	1.38 (1.32-1.44)	2.52e-47	A	43007	n.a.	0	n.a.	-	A	43.4
SNCA	rs11931074	chr4:90858538	T vs. G	C	21	36348	1.39 (1.31-1.47)	4.49e-29	A	17532	n.a.	0	n.a.	-	A	25.4
SNCA	rs11931074	chr4:90858538	T vs. G	A	4	21740	1.34 (1.22-1.48)	3.39e-09	A	18005	n.a.	50	n.a.	-	A	6.2
SNCA	rs356220	chr4:90860363	T vs. C	All (C only)	5	20427	1.31 (1.26-1.37)	1.11e-33	A	15735	n.a.	2	n.a.	-	A	30.1
SNCA	rs356221	chr4:90861487	A vs. T	All (C, A)	6	5885	1.30 (1.20-1.40)	9.56e-12	A	5034	n.a.	0	n.a.	-	A	8.7
SNCA	rs356221	chr4:90861487	A vs. T	C	5	4080	1.25 (1.14-1.36)	8.08e-07	A	3824	A	0	A	-	A	4.1
SNCA	rs168552	chr4:90862167	G vs. A	All (C only)	4	10110	1.18 (1.09-1.27)	1.38e-05	A	6495	A	11	A	-	A	3
SNCA	rs356165	chr4:90865909	G vs. A	C	9	6734	1.31 (1.21-1.43)	6.98e-11	A	5453	n.a.	22	n.a.	-	A	7.8
SNCA	rs356165	chr4:90865909	G vs. A	All (C, A)	11	9161	1.32 (1.21-1.44)	5.86e-10	A	8324	n.a.	47	n.a.	-	A	6.9
SNCA	rs7684318	chr4:90874026	T vs. C	All (C, A)	6	8439	0.64 (0.51-0.79)	4.96e-05	A	4617	C	82	A	-	C	2.1
SNCA	rs7684318	chr4:90874026	T vs. C	C	3	4441	0.74 (0.62-0.88)	0.000838	B	954	A	0	A	-	B	1.4
SNCA	rs7684318	chr4:90874026	T vs. C	A	3	3998	0.55 (0.39-0.78)	0.000938	A	3663	C	91	A	-	C	<1
SNCA	rs356204	chr4:90882565	A vs. G	All (C only)	4	4621	1.27 (1.17-1.38)	1.38e-08	A	4410	n.a.	0	n.a.	-	A	5.7
SNCA	rs3822086	chr4:90883817	T vs. C	All (C only)	4	4686	1.47 (1.27-1.70)	4.04e-07	B	772	A	0	A	-	B	4.1
SNCA	rs356203	chr4:90885064	G vs. A	All (C only)	4	4627	1.32 (1.19-1.47)	2.07e-07	A	3808	B	34	A	-	B	4.6
SNCA	rs356168	chr4:90893454	C vs. T	All (C only)	6	9333	1.23 (1.13-1.35)	9.14e-06	A	9237	C	53	A	-	C	3.1
SNCA	rs3857059	chr4:90894261	G vs. A	All (C, A)	8	40787	1.41 (1.33-1.49)	2.86e-32	A	38873	n.a.	9	n.a.	-	A	28.5
SNCA	rs3857059	chr4:90894261	G vs. A	C	5	20395	1.46 (1.35-1.58)	3.89e-21	A	14873	n.a.	0	n.a.	-	A	17.4
SNCA	rs3857059	chr4:90894261	G vs. A	A	3	20392	1.34 (1.18-1.52)	4.41e-06	A	16784	C	64	A	-	C	3.3
SNCA	rs2736990	chr4:90897564	C vs. T	All (C only)	6	24887	1.26 (1.22-1.31)	1.77e-34	A	23888	n.a.	0	n.a.	Regr	A	30.9
SNCA	rs2572324	chr4:90897821	C vs. T	All (C only)	6	8121	1.21 (1.1-1.32)	0.000105	A	5125	B	47	A	-	B	2.2
SNCA	rs356199	chr4:90901350	C vs. T	All (C only)	4	4682	1.12 (1.02-1.23)	0.0186	A	3009	A	8	C	Low OR	C	<1
SNCA	rs10516845	chr4:90903301	G vs. A	All (C only)	6	4476	1.30 (1.11-1.52)	0.00115	A	1095	A	0	A	-	A	1.3
SNCA	rs3796661	chr4:90906530	A vs. G	All (C, A)	5	8086	1.50 (1.34-1.68)	5.51e-12	A	2596	n.a.	0	n.a.	-	A	8.5
SNCA	rs3796661	chr4:90906530	A vs. G	C	4	6314	1.47 (1.18-1.81)	0.000447	B	391	A	0	A	-	B	1.4
SNCA	rs356188	chr4:90910560	G vs. A	All (C only)	4	13587	0.80 (0.75-0.86)	9.03e-11	A	5235	n.a.	0	n.a.	-	A	7.8
SNCA	rs356187	chr4:90911491	A vs. G	All (C only)	4	4742	1.12 (1.02-1.23)	0.0235	A	2857	A	14	C	Low OR	C	<1
SNCA	rs356164	chr4:90912499	G vs. C	All (C only)	6	5407	0.79 (0.71-0.87)	4.92e-06	A	1754	A	0	A	-	A	3.4
SNCA	rs356186	chr4:90924387	T vs. C	All (C only)	8	6639	0.80 (0.73-0.88)	1.41e-06	A	2429	A	0	A	-	A	3.9
SNCA	rs3775439	chr4:90928764	T vs. C	All (C only)	6	20353	1.21 (1.14-1.29)	1.11e-09	A	14716	n.a.	0	n.a.	-	A	6.8
SNCA	rs2737029	chr4:90930793	G vs. A	C	7	8791	1.28 (1.20-1.36)	2.78e-15	A	7376	n.a.	0	n.a.	-	A	12.1
SNCA	rs2737029	chr4:90930793	G vs. A	All (C, A)	8	10587	1.33 (1.22-1.44)	7.07e-12	A	9631	n.a.	49	n.a.	-	A	8.7
SNCA	rs3775442	chr4:90934254	T vs. C	All (C, A)	4	7213	1.35 (1.20-1.53)	1.34e-06	A	1614	A	0	C	F	C	3.8
SNCA	rs3775442	chr4:90934254	T vs. C	C	3	5411	1.28 (0.94-1.74)	0.121	-	-	-	-	-	-	-	-
SNCA	rs9995651	chr4:90935200	G vs. C	All (C only)	4	5223	1.32 (1.11-1.58)	0.0022	B	509	A	0	A	-	B	1.1
SNCA	rs2583959	chr4:90940660	G vs. C	All (C only)	5	5661	1.11 (1.02-1.20)	0.0157	A	3354	A	0	C	Low OR	C	<1
SNCA	rs6848726	chr4:90941894	T vs. C	All (C only)	6	4600	0.96 (0.88-1.05)	0.362	-	-	-	-	-	-	-	-
SNCA	rs3775444	chr4:90945559	T vs. C	All (C only)	4	4500	1.15 (0.80-1.64)	0.461	-	-	-	-	-	-	-	-
SNCA	rs2197120	chr4:90948625	A vs. G	All (C only)	5	10750	0.81 (0.75-0.88)	1.26e-07	A	4447	A	0	A	-	A	4.8
SNCA	rs894278	chr4:90953558	G vs. T	C	4	16838	1.38 (1.26-1.51)	8.49e-12	A	2162	n.a.	0	n.a.	Regr	A	8.6
SNCA	rs894278	chr4:90953558	G vs. T	All (C, A)	9	39705	1.27 (1.18-1.37)	1.92e-10	A	19602	n.a.	47	n.a.	Regr	A	7.5
SNCA	rs894278	chr4:90953558	G vs. T	A	5	22867	1.20 (1.11-1.31)	1.84e-05	A	17440	B	44	A	-	B	2.9
SNCA	rs2119787	chr4:90953751	C vs. T	All (C only)	5	7122	0.91 (0.85-0.98)	0.0107	A	5651	A	0	C	Low OR	C	<1
SNCA	rs3822095	chr4:90955540	C vs. T	All (C only)	4	11061	0.92 (0.87-0.98)	0.00632	A	11058	A	0	C	Low OR	C	<1
SNCA	rs1812923	chr4:90958562	A vs. C	C	3	9060	1.00 (0.93-1.07)	0.946	-	-	-	-	-	-	-	-
SNCA	rs1812923	chr4:90958562	A vs. C	All (C, A)	4	10861	1.00 (0.94-1.07)	0.949	-	-	-	-	-	-	-	-
SNCA	rs2737020	chr4:90959901	T vs. C	All (C only)	5	3971	0.99 (0.79-1.25)	0.952	-	-	-	-	-	-	-	-
SNCA	rs10005233	chr4:90962604	G vs. A	All (C, A)	7	6383	0.94 (0.87-1.01)	0.104	-	-	-	-	-	-	-	-
SNCA	rs10005233	chr4:90962604	G vs. A	C	6	5935	0.93 (0.85-1.02)	0.119	-	-	-	-	-	-	-	-
SNCA	rs2301135	chr4:90977412	C vs. G	All (C, A)	6	7474	0.95 (0.86-1.06)	0.371	-	-	-	-	-	-	-	-
SNCA	rs2301135	chr4:90977412	C vs. G	C	4	5343	0.98 (0.88-1.10)	0.75	-	-	-	-	-	-	-	-
SNCA	rs2301134	chr4:90977968	T vs. C	All (C only)	6	10232	0.99 (0.90-1.07)	0.729	-	-	-	-	-	-	-	-
SNCA	rs2619363	chr4:90978070	A vs. C	All (C, A)	10	7263	1.10 (1.02-1.19)	0.00976	A	3976	A	0	C	Low OR	C	<1
SNCA	rs2619363	chr4:90978070	A vs. C	C	9	6815	1.10 (1.02-1.20)	0.0133	A	3972	A	6	C	Low OR	C	<1
SNCA	rs2619364	chr4:90978910	G vs. A	All (C only)	9	9271	1.19 (1.10-1.28)	5.43e-06	A	5249	A	19	A	-	A	3.3
SNCA	rs2583988	chr4:90979851	T vs. C	All (C only)	19	13719	1.22 (1.13-1.32)	9.52e-07	A	7872	B	48	A	-	B	4
SNCA	rs1372525	chr4:90995188	G vs. A	All (C only)	4	4622	0.95 (0.88-1.04)	0.248	-	-	-	-	-	-	-	-
SNCA	rs2737026	chr4:90998846	T vs. C	All (C only)	4	4747	0.82 (0.74-0.90)	7.7e-05	A	2005	A	0	A	-	A	2.3
SNCA	rs6532194	chr4:90999925	T vs. C	A	5	22844	1.29 (1.20-1.39)	4.91e-11	A	18481	n.a.	31	n.a.	-	A	8
SNCA	rs6532194	chr4:90999925	T vs. C	All (C, A)	9	36152	1.23 (1.14-1.32)	1.7e-08	A	32810	n.a.	45	n.a.	Regr	A	5.6
SNCA	rs6532194	chr4:90999925	T vs. C	C	4	13308	1.14 (1.02-1.27)	0.0182	A	12287	B	27	C	Low OR	C	<1
MMRN1	rs6532197	chr4:91016324	G vs. A	All (C only)	4	14989	1.31 (1.19-1.44)	3.1e-08	A	13537	n.a.	0	n.a.	-	A	5.3
MMRN1	rs3775478	chr4:91061863	G vs. A	All (C only)	4	12237	1.30 (1.18-1.44)	1.05e-07	A	11992	A	0	A	-	A	4.8
GAK	chr4:911311*	chr4:911311	C vs. G	All (C only)	6	19663	1.24 (1.16-1.33)	2.63e-09	A	11511	n.a.	51	n.a.	-	A	6.4
FAM190A	rs1350855	chr4:91413829	T vs. C	All (C only)	4	7291	0.89 (0.79-1.01)	0.0802	-	-	-	-	-	-	-	-
TMEM175	rs935965	chr4:918684	A vs. G	All (C only)	11	60149	0.94 (0.90-0.98)	0.00474	A	35592	B	27	C	Low OR	C	<1
GAK	rs6599388*	chr4:929087	T vs. C	All (C only)	20	40403	1.17 (1.12-1.23)	9.54e-11	A	25314	n.a.	45	n.a.	-	A	7.8
DGKQ	rs11248060*	chr4:954359	T vs. C	All (C only)	10	57716	1.21 (1.15-1.27)	3.04e-12	A	14177	n.a.	11	n.a.	-	A	9.2
UNC5C	rs2241743	chr4:96310547	C vs. T	C	12	9182	1.02 (0.94-1.11)	0.646	-	-	-	-	-	-	-	-
UNC5C	rs2241743	chr4:96310547	C vs. T	All (C, A)	13	9585	1.01 (0.93-1.09)	0.811	-	-	-	-	-	-	-	-
UNC5C	rs11097458	chr4:96318390	C vs. T	All (C, A)	6	5470	1.05 (0.91-1.21)	0.504	-	-	-	-	-	-	-	-
UNC5C	rs11097458	chr4:96318390	C vs. T	C	5	4653	1.05 (0.88-1.25)	0.571	-	-	-	-	-	-	-	-
UNC5C	rs4444836	chr4:96607674	G vs. A	All (C, A)	5	8590	0.96 (0.87-1.06)	0.426	-	-	-	-	-	-	-	-
UNC5C	rs4444836	chr4:96607674	G vs. A	C	4	7875	0.97 (0.84-1.11)	0.607	-	-	-	-	-	-	-	-
GWA_5p15.2	rs1428954	chr5:10016889	A vs. G	All (C only)	4	16172	0.94 (0.85-1.05)	0.293	-	-	-	-	-	-	-	-
GWA_5p15.2	rs10072891	chr5:10026935	A vs. G	All (C only)	4	16461	0.94 (0.85-1.04)	0.241	-	-	-	-	-	-	-	-
GWA_5p15.2	rs38065	chr5:10037418	C vs. A	All (C only)	4	16350	0.94 (0.81-1.09)	0.416	-	-	-	-	-	-	-	-
EFNA5	rs153690	chr5:106836832	C vs. G	All (C only)	4	3930	0.93 (0.81-1.06)	0.257	-	-	-	-	-	-	-	-
FER	rs10477933	chr5:108135651	C vs. A	All (C only)	4	16902	0.97 (0.85-1.11)	0.66	-	-	-	-	-	-	-	-
FER	rs2113001	chr5:108149255	A vs. G	All (C only)	4	16235	0.97 (0.84-1.13)	0.725	-	-	-	-	-	-	-	-
SNCAIP	rs1946649	chr5:121754613	C vs. T	C	3	7719	0.96 (0.87-1.07)	0.51	-	-	-	-	-	-	-	-
SNCAIP	rs1946649	chr5:121754613	C vs. T	All (C, O)	4	8212	0.98 (0.91-1.07)	0.692	-	-	-	-	-	-	-	-
SNCAIP	rs2242224*	chr5:121788920	T vs. C	C	11	59447	0.97 (0.92-1.03)	0.284	-	-	-	-	-	-	-	-
SNCAIP	rs2242224*	chr5:121788920	T vs. C	All (C, O)	12	59950	0.97 (0.92-1.03)	0.317	-	-	-	-	-	-	-	-
SNCAIP	rs2242223	chr5:121789360	G vs. A	C	3	7754	0.95 (0.81-1.11)	0.519	-	-	-	-	-	-	-	-
SNCAIP	rs2242223	chr5:121789360	G vs. A	All (C, A)	4	8133	0.98 (0.85-1.14)	0.825	-	-	-	-	-	-	-	-
SNCAIP	rs2290987	chr5:121804200	C vs. T	C	4	8217	0.95 (0.84-1.08)	0.427	-	-	-	-	-	-	-	-
SNCAIP	rs2290987	chr5:121804200	C vs. T	All (C, A)	5	8596	0.97 (0.87-1.10)	0.666	-	-	-	-	-	-	-	-
SNCAIP	rs28937592	chr5:121814302	T vs. C	All (C only)	4	3458	0.77 (0.50-1.18)	0.228	-	-	-	-	-	-	-	-
IL4	rs2070874	chr5:132037609	C vs. T	All (C, A)	4	3978	0.94 (0.83-1.06)	0.326	-	-	-	-	-	-	-	-
IL4	rs2070874	chr5:132037609	C vs. T	C	3	3599	0.94 (0.82-1.08)	0.399	-	-	-	-	-	-	-	-
IL4	rs2243290	chr5:132046068	C vs. A	All (C, A)	4	4064	0.94 (0.83-1.06)	0.305	-	-	-	-	-	-	-	-
IL4	rs2243290	chr5:132046068	C vs. A	C	3	3684	0.94 (0.83-1.08)	0.398	-	-	-	-	-	-	-	-
HSPA9	rs256002	chr5:137923117	T vs. C	All (C, A)	4	7851	1.03 (0.96-1.11)	0.365	-	-	-	-	-	-	-	-
HSPA9	rs256002	chr5:137923117	T vs. C	C	3	7470	1.03 (0.96-1.11)	0.393	-	-	-	-	-	-	-	-
HSPA9	rs1042665	chr5:137930238	C vs. T	C	3	3486	1.06 (0.92-1.23)	0.415	-	-	-	-	-	-	-	-
HSPA9	rs1042665	chr5:137930238	C vs. T	All (C, A)	4	3866	1.03 (0.89-1.19)	0.693	-	-	-	-	-	-	-	-
TRIO	rs26286	chr5:14219402	T vs. G	All (C only)	4	15321	1.05 (0.95-1.15)	0.371	-	-	-	-	-	-	-	-
SLC6A3	rs6347	chr5:1464412	G vs. A	A	4	1540	0.81 (0.57-1.16)	0.257	-	-	-	-	-	-	-	-
SLC6A3	rs6347	chr5:1464412	G vs. A	All (C, A, O)	8	11362	0.99 (0.90-1.08)	0.765	-	-	-	-	-	-	-	-
SLC6A3	rs6347	chr5:1464412	G vs. A	C	3	9652	1.01 (0.94-1.08)	0.794	-	-	-	-	-	-	-	-
SLC6A3	rs2550956	chr5:1500841	T vs. C	C	4	4033	0.95 (0.86-1.06)	0.377	-	-	-	-	-	-	-	-
SLC6A3	rs2550956	chr5:1500841	T vs. C	All (C, O)	5	4159	0.97 (0.83-1.13)	0.693	-	-	-	-	-	-	-	-
SLC6A3	rs2652510	chr5:1500860	G vs. A	C	4	4101	1.11 (0.97-1.27)	0.121	-	-	-	-	-	-	-	-
SLC6A3	rs2652510	chr5:1500860	G vs. A	All (C, O)	5	4227	1.08 (0.94-1.25)	0.295	-	-	-	-	-	-	-	-
SLIT3	rs9688032	chr5:168488773	A vs. T	All (C only)	4	3811	1.01 (0.82-1.24)	0.942	-	-	-	-	-	-	-	-
CDH6	rs4457092*	chr5:31270987	A vs. C	All (C only)	10	58416	1.05 (0.97-1.13)	0.238	-	-	-	-	-	-	-	-
CDH6	rs4072916*	chr5:31273093	A vs. G	All (C only)	11	58958	1.05 (0.97-1.14)	0.209	-	-	-	-	-	-	-	-
C9	rs4957473	chr5:39378920	G vs. A	All (C only)	4	14281	0.97 (0.80-1.18)	0.758	-	-	-	-	-	-	-	-
ADAMTS16	rs7721079	chr5:5367703	C vs. A	All (C only)	4	5079	0.99 (0.91-1.08)	0.782	-	-	-	-	-	-	-	-
GWA_5p15.32	rs7723605	chr5:5407615	C vs. T	All (C, A, O)	25	17134	0.97 (0.90-1.05)	0.443	-	-	-	-	-	-	-	-
GWA_5p15.32	rs7723605	chr5:5407615	C vs. T	C	19	15210	0.99 (0.90-1.09)	0.795	-	-	-	-	-	-	-	-
GWA_5p15.32	rs2964459	chr5:5414469	G vs. T	All (C only)	4	4913	1.06 (0.95-1.17)	0.308	-	-	-	-	-	-	-	-
ZSWIM6	rs1423326*	chr5:60896208	G vs. T	All (C only)	10	58571	0.94 (0.89-0.99)	0.0309	A	39851	C	59	C	Low OR, F	C	<1
AP3B1	rs252761*	chr5:77416479	C vs. A	All (C only)	10	58851	0.95 (0.91-1.00)	0.0478	A	48523	C	53	C	Low OR, F	C	<1
AP3B1	rs252751	chr5:77424969	A vs. G	All (C only)	4	16042	1.01 (0.79-1.28)	0.953	-	-	-	-	-	-	-	-
AP3B1	rs10039931*	chr5:77549929	C vs. A	All (C only)	10	59254	0.95 (0.90-1.00)	0.0447	A	51750	C	59	C	Low OR, F	C	<1
SEMA5A	rs786843	chr5:9093141	C vs. G	All (C, A)	4	3718	0.96 (0.86-1.08)	0.514	-	-	-	-	-	-	-	-
SEMA5A	rs786843	chr5:9093141	C vs. G	C	3	3244	0.97 (0.85-1.11)	0.632	-	-	-	-	-	-	-	-
SEMA5A	rs1806151	chr5:9207659	G vs. C	All (C, A)	4	3798	0.98 (0.89-1.07)	0.641	-	-	-	-	-	-	-	-
SEMA5A	rs1806151	chr5:9207659	G vs. C	C	3	3324	0.98 (0.89-1.08)	0.673	-	-	-	-	-	-	-	-
SEMA5A	rs12658266	chr5:9358725	C vs. T	C	4	4052	0.88 (0.75-1.03)	0.112	-	-	-	-	-	-	-	-
SEMA5A	rs12658266	chr5:9358725	C vs. T	All (C, A)	5	4796	0.92 (0.80-1.07)	0.275	-	-	-	-	-	-	-	-
SEMA5A	rs7702187*	chr5:9385281	T vs. A	All (C, A, O)	36	70114	0.94 (0.89-1.00)	0.0454	A	21702	B	43	C	Low OR, F, Regr	C	<1
SEMA5A	rs7702187*	chr5:9385281	T vs. A	C	28	67266	0.95 (0.90-1.00)	0.0545	-	-	-	-	-	-	-	-
SEMA5A	rs7702187	chr5:9385281	T vs. A	A	4	2188	1.15 (0.98-1.34)	0.0814	-	-	-	-	-	-	-	-
SEMA5A	rs368226	chr5:9470056	G vs. C	C	3	3321	0.88 (0.73-1.08)	0.216	-	-	-	-	-	-	-	-
SEMA5A	rs368226	chr5:9470056	G vs. C	All (C, A)	4	3795	0.91 (0.78-1.07)	0.266	-	-	-	-	-	-	-	-
SEMA5A	rs3798097	chr5:9595529	T vs. C	All (C, A)	5	8281	0.97 (0.88-1.08)	0.609	-	-	-	-	-	-	-	-
SEMA5A	rs3798097	chr5:9595529	T vs. C	C	3	7245	0.98 (0.91-1.06)	0.687	-	-	-	-	-	-	-	-
PRDM13/MCHR2	rs4431442	chr6:100320236	G vs. A	All (C only)	4	10363	1.06 (0.90-1.24)	0.509	-	-	-	-	-	-	-	-
FYN	rs6910116	chr6:112182621	G vs. A	C	4	8009	1.05 (0.95-1.16)	0.32	-	-	-	-	-	-	-	-
FYN	rs6910116	chr6:112182621	G vs. A	All (C, A)	5	8781	1.04 (0.96-1.13)	0.335	-	-	-	-	-	-	-	-
NEDD9	rs6932615	chr6:11372598	C vs. A	All (C only)	4	18279	0.95 (0.87-1.03)	0.206	-	-	-	-	-	-	-	-
NEDD9	rs7748486	chr6:11394266	G vs. A	All (C only)	4	16865	0.94 (0.86-1.04)	0.235	-	-	-	-	-	-	-	-
NEDD9	rs760678	chr6:11442640	C vs. G	All (C only)	5	5390	0.95 (0.86-1.04)	0.272	-	-	-	-	-	-	-	-
GWA_6q22.31	rs9374809	chr6:119977195	G vs. T	All (C only)	4	13608	0.97 (0.85-1.11)	0.658	-	-	-	-	-	-	-	-
GWA_6q22.31	rs9285433	chr6:119979004	G vs. A	All (C only)	4	13897	0.98 (0.84-1.14)	0.763	-	-	-	-	-	-	-	-
GWA_6q22.31	rs2794256	chr6:119985100	T vs. C	All (C only)	4	13140	0.97 (0.84-1.12)	0.643	-	-	-	-	-	-	-	-
PHACTR2	rs11155313	chr6:144003270	G vs. A	All (C only)	7	5781	1.09 (0.90-1.32)	0.392	-	-	-	-	-	-	-	-
ESR1	rs2234693	chr6:152205028	C vs. T	All (C, A)	4	3677	0.97 (0.88-1.06)	0.516	-	-	-	-	-	-	-	-
ESR1	rs2234693	chr6:152205028	C vs. T	C	3	3555	0.97 (0.89-1.07)	0.583	-	-	-	-	-	-	-	-
ESR1	rs9340799	chr6:152205074	G vs. A	All (C, A)	4	3708	1.01 (0.90-1.14)	0.835	-	-	-	-	-	-	-	-
ESR1	rs9340799	chr6:152205074	G vs. A	C	3	3606	1.00 (0.90-1.10)	0.954	-	-	-	-	-	-	-	-
GWA_6q25.2	rs17083928	chr6:153706411	G vs. A	All (C only)	4	16530	1.12 (0.95-1.33)	0.171	-	-	-	-	-	-	-	-
SOD2	rs4880	chr6:160033862	C vs. T	A	3	937	1.59 (1.21-2.08)	0.000838	B	287	A	0	A	-	B	1.1
SOD2	rs4880*	chr6:160033862	C vs. T	All (C, A, O)	15	62091	1.03 (0.99-1.08)	0.171	-	-	-	-	-	-	-	-
SOD2	rs4880*	chr6:160033862	C vs. T	C	11	60984	1.01 (0.98-1.05)	0.468	-	-	-	-	-	-	-	-
SLC22A2	rs316244	chr6:160716555	A vs. G	C	3	3707	0.94 (0.82-1.09)	0.43	-	-	-	-	-	-	-	-
SLC22A2	rs316244	chr6:160716555	A vs. G	All (C, A)	4	4087	0.97 (0.85-1.11)	0.668	-	-	-	-	-	-	-	-
PARK2	rs1801334	chr6:161701215	A vs. G	All (C only)	9	4994	1.00 (0.74-1.35)	0.991	-	-	-	-	-	-	-	-
PARK2	rs1801582*	chr6:161727845	G vs. C	All (C, A, D, O)	21	61162	0.96 (0.89-1.03)	0.222	-	-	-	-	-	-	-	-
PARK2	rs1801582*	chr6:161727845	G vs. C	C	15	59883	1.00 (0.96-1.05)	0.867	-	-	-	-	-	-	-	-
PARK2	rs10945756	chr6:161910329	T vs. C	All (C only)	5	11341	0.96 (0.87-1.05)	0.351	-	-	-	-	-	-	-	-
PARK2	rs1801474	chr6:162542187	A vs. G	A	3	758	1.20 (0.96-1.50)	0.118	-	-	-	-	-	-	-	-
PARK2	rs1801474	chr6:162542187	A vs. G	C	12	6019	0.97 (0.74-1.28)	0.833	-	-	-	-	-	-	-	-
PARK2	rs1801474	chr6:162542187	A vs. G	All (C, A, D, O)	19	7547	1.01 (0.82-1.24)	0.917	-	-	-	-	-	-	-	-
PARK2	rs4709583	chr6:162542294	T vs. C	All (C, O)	4	3835	0.97 (0.79-1.19)	0.76	-	-	-	-	-	-	-	-
PARK2	rs4709583	chr6:162542294	T vs. C	C	3	3597	1.02 (0.86-1.21)	0.829	-	-	-	-	-	-	-	-
PARK2	rs2075923	chr6:162784307	C vs. T	All (C, A, O)	5	4312	0.92 (0.83-1.02)	0.105	-	-	-	-	-	-	-	-
PARK2	rs2075923	chr6:162784307	C vs. T	C	3	3695	0.94 (0.85-1.05)	0.297	-	-	-	-	-	-	-	-
PARK2	rs2849520	chr6:163052028	G vs. A	All (C only)	4	4225	1.00 (0.90-1.11)	0.989	-	-	-	-	-	-	-	-
PACRG	rs9347683	chr6:163069045	G vs. T	C	7	6134	0.97 (0.86-1.10)	0.614	-	-	-	-	-	-	-	-
PACRG	rs9347683	chr6:163069045	G vs. T	A	3	1997	1.02 (0.90-1.15)	0.8	-	-	-	-	-	-	-	-
PACRG	rs9347683	chr6:163069045	G vs. T	All (C, A)	10	8131	0.99 (0.91-1.07)	0.803	-	-	-	-	-	-	-	-
PARK2	rs2276201	chr6:163069487	G vs. A	C	5	8650	1.01 (0.92-1.11)	0.848	-	-	-	-	-	-	-	-
PARK2	rs2276201	chr6:163069487	G vs. A	All (C, A)	6	9030	1.00 (0.92-1.08)	0.921	-	-	-	-	-	-	-	-
LRRC16A	rs11759658	chr6:25467524	A vs. G	All (C only)	4	16582	1.01 (0.87-1.18)	0.877	-	-	-	-	-	-	-	-
HFE	rs1799945	chr6:26199158	G vs. C	All (C only)	8	7566	1.06 (0.95-1.19)	0.271	-	-	-	-	-	-	-	-
HFE	rs1800562	chr6:26201120	A vs. G	All (C only)	8	7562	0.88 (0.74-1.06)	0.192	-	-	-	-	-	-	-	-
TNF	rs1800630	chr6:31650455	A vs. C	All (C, A)	4	4276	0.98 (0.87-1.10)	0.713	-	-	-	-	-	-	-	-
TNF	rs1799724	chr6:31650461	T vs. C	All (C, A)	4	3984	1.10 (0.96-1.27)	0.176	-	-	-	-	-	-	-	-
TNF	rs1800629	chr6:31651010	A vs. G	All (C, A)	8	5746	1.08 (0.98-1.20)	0.122	-	-	-	-	-	-	-	-
TNF	rs1800629	chr6:31651010	A vs. G	C	7	5051	1.07 (0.96-1.19)	0.207	-	-	-	-	-	-	-	-
HLA-DRA	rs3129882*	chr6:32517508	G vs. A	All (C only)	14	62809	1.04 (0.98-1.11)	0.158	-	-	-	-	-	-	-	-
HLA-DRB5	chr6:32588205*	chr6:32588205	G vs. A	All (C only)	4	10924	0.75 (0.68-0.84)	2.9e-07	A	3173	A	0	A	-	A	4.4
HLA-DRB5	chr6:32609909*	chr6:32609909	G vs. A	All (C only)	7	17897	0.82 (0.70-0.98)	0.0238	A	7897	C	84	A	-	C	<1
HLA-DQB1	rs13192471*	chr6:32779081	G vs. A	All (C only)	10	61085	1.10 (0.99-1.21)	0.067	-	-	-	-	-	-	-	-
GLO1	rs3778443	chr6:38762466	A vs. G	C	3	7415	0.89 (0.72-1.11)	0.306	-	-	-	-	-	-	-	-
GLO1	rs3778443	chr6:38762466	A vs. G	All (C, A)	4	7795	0.93 (0.79-1.08)	0.338	-	-	-	-	-	-	-	-
VEGFA	rs2010963	chr6:43846328	C vs. G	C	3	3045	1.04 (0.93-1.15)	0.53	-	-	-	-	-	-	-	-
VEGFA	rs2010963	chr6:43846328	C vs. G	All (C, A)	4	3554	1.02 (0.93-1.13)	0.689	-	-	-	-	-	-	-	-
VEGFA	rs3024998	chr6:43853555	T vs. C	All (C, A)	4	4040	1.05 (0.95-1.15)	0.342	-	-	-	-	-	-	-	-
VEGFA	rs3024998	chr6:43853555	T vs. C	C	3	3531	1.04 (0.94-1.16)	0.412	-	-	-	-	-	-	-	-
PLA2G7	rs1051931*	chr6:46780902	T vs. C	All (C only)	12	59904	0.99 (0.95-1.03)	0.631	-	-	-	-	-	-	-	-
COL19A1	rs9360414	chr6:70963882	T vs. C	All (C only)	4	16640	1.08 (0.98-1.19)	0.114	-	-	-	-	-	-	-	-
GWA_6q16.1	rs332496	chr6:93512596	C vs. A	All (C only)	5	17295	0.96 (0.84-1.10)	0.577	-	-	-	-	-	-	-	-
GWA_6q16.1	rs332492	chr6:93515721	G vs. A	All (C only)	5	17131	0.96 (0.84-1.10)	0.562	-	-	-	-	-	-	-	-
GWA_6q16.1	rs1878071	chr6:93533402	C vs. A	All (C only)	5	17132	0.96 (0.84-1.11)	0.601	-	-	-	-	-	-	-	-
SND1	rs17151739	chr7:127521058	A vs. C	All (C only)	4	17173	1.03 (0.93-1.14)	0.605	-	-	-	-	-	-	-	-
SND1	rs10447854	chr7:127583040	G vs. A	All (C only)	5	17256	1.05 (0.89-1.25)	0.558	-	-	-	-	-	-	-	-
GWA_7q32.1	rs1017607*	chr7:127601593	G vs. A	All (C only)	10	58823	1.05 (1.00-1.10)	0.0435	A	55136	B	47	C	Low OR	C	<1
EN2	rs10235922	chr7:154939867	G vs. C	All (C only)	4	5251	0.99 (0.75-1.30)	0.945	-	-	-	-	-	-	-	-
EN2	rs1345514	chr7:154941911	T vs. C	All (C only)	4	4472	1.01 (0.92-1.10)	0.904	-	-	-	-	-	-	-	-
DNAH11	rs2033884	chr7:21695152	C vs. A	All (C only)	4	16558	1.08 (0.98-1.20)	0.137	-	-	-	-	-	-	-	-
IL6	rs1800795*	chr7:22733170	C vs. G	All (C only)	12	59773	1.02 (0.98-1.05)	0.328	-	-	-	-	-	-	-	-
ADCYAP1R1	rs2267732	chr7:31100842	C vs. A	C	3	3236	0.98 (0.88-1.09)	0.657	-	-	-	-	-	-	-	-
ADCYAP1R1	rs2267732	chr7:31100842	C vs. A	All (C, A)	4	3617	1.02 (0.89-1.17)	0.764	-	-	-	-	-	-	-	-
GWA_7p14.2	rs17329669*	chr7:36818454	G vs. A	All (C, A, O)	30	67925	1.04 (0.98-1.11)	0.207	-	-	-	-	-	-	-	-
GWA_7p14.2	rs17329669*	chr7:36818454	G vs. A	C	24	65998	1.05 (0.98-1.12)	0.21	-	-	-	-	-	-	-	-
PKD1L1	rs2686830	chr7:47957563	A vs. G	All (C only)	4	40925	1.04 (0.94-1.16)	0.437	-	-	-	-	-	-	-	-
SUN3	rs2708909	chr7:48018204	G vs. T	All (C only)	4	15024	1.06 (0.96-1.17)	0.24	-	-	-	-	-	-	-	-
ABCB1	rs3842	chr7:86971302	G vs. A	All (C, A)	5	4116	1.06 (0.94-1.19)	0.322	-	-	-	-	-	-	-	-
ABCB1	rs3842	chr7:86971302	G vs. A	C	3	3295	1.05 (0.89-1.23)	0.575	-	-	-	-	-	-	-	-
ABCB1	rs1045642	chr7:86976581	C vs. T	A	3	1300	1.21 (0.90-1.62)	0.205	-	-	-	-	-	-	-	-
ABCB1	rs1045642	chr7:86976581	C vs. T	All (C, A)	13	7227	1.03 (0.95-1.12)	0.431	-	-	-	-	-	-	-	-
ABCB1	rs1045642	chr7:86976581	C vs. T	C	10	5927	0.99 (0.92-1.07)	0.821	-	-	-	-	-	-	-	-
ABCB1	rs2235035	chr7:87017022	T vs. C	All (C, A)	4	5425	1.04 (0.95-1.14)	0.391	-	-	-	-	-	-	-	-
ABCB1	rs2235035	chr7:87017022	T vs. C	C	3	3650	0.99 (0.89-1.09)	0.822	-	-	-	-	-	-	-	-
ABCB1	rs1128503	chr7:87017537	T vs. C	All (C, A)	7	5351	0.97 (0.88-1.08)	0.59	-	-	-	-	-	-	-	-
ABCB1	rs1128503	chr7:87017537	T vs. C	C	5	4530	1.02 (0.93-1.12)	0.666	-	-	-	-	-	-	-	-
ABCB1	rs1202169	chr7:87033786	G vs. A	A	3	1200	1.12 (0.89-1.42)	0.32	-	-	-	-	-	-	-	-
ABCB1	rs1202169	chr7:87033786	G vs. A	All (C, A)	6	8460	1.03 (0.96-1.10)	0.448	-	-	-	-	-	-	-	-
ABCB1	rs1202169	chr7:87033786	G vs. A	C	3	7260	1.02 (0.95-1.10)	0.643	-	-	-	-	-	-	-	-
ABCB1	rs3213619	chr7:87068129	C vs. T	All (C, A)	6	4310	0.98 (0.79-1.22)	0.858	-	-	-	-	-	-	-	-
ABCB1	rs3213619	chr7:87068129	C vs. T	C	4	3491	1.02 (0.80-1.29)	0.898	-	-	-	-	-	-	-	-
ZNF804B	rs12674264	chr7:88389392	G vs. A	All (C only)	4	16756	1.00 (0.80-1.25)	0.966	-	-	-	-	-	-	-	-
ZNF804B	rs9886345	chr7:88392079	G vs. A	All (C only)	4	16736	0.99 (0.83-1.20)	0.947	-	-	-	-	-	-	-	-
PON1	rs662*	chr7:94775382	G vs. A	C	15	63797	0.96 (0.93-0.99)	0.00481	A	36174	A	0	C	Low OR	C	<1
PON1	rs662*	chr7:94775382	G vs. A	All (C, A)	17	64578	0.96 (0.93-0.99)	0.0148	A	37173	A	0	C	Low OR	C	<1
PON1	rs854560	chr7:94784020	M vs. L	A	3	1119	0.75 (0.52-1.09)	0.137	-	-	-	-	-	-	-	-
PON1	rs854560*	chr7:94784020	M vs. L	C	16	31108	1.03 (0.98-1.09)	0.274	-	-	-	-	-	-	-	-
PON1	rs854560*	chr7:94784020	M vs. L	All (C, A)	19	32227	1.03 (0.97-1.08)	0.381	-	-	-	-	-	-	-	-
PON2	rs7493	chr7:94872711	C vs. G	All (C only)	4	3843	0.90 (0.79-1.03)	0.129	-	-	-	-	-	-	-	-
GWA_8q24.12	rs2046571*	chr8:122424893	A vs. G	All (C only)	11	61234	1.04 (0.98-1.11)	0.237	-	-	-	-	-	-	-	-
FGF20	rs12720208	chr8:16894770	T vs. C	All (C only)	9	7142	1.04 (0.92-1.17)	0.569	-	-	-	-	-	-	-	-
FGF20	rs1721100	chr8:16894869	C vs. G	C	8	6499	0.96 (0.89-1.04)	0.324	-	-	-	-	-	-	-	-
FGF20	rs1721100	chr8:16894869	C vs. G	All (C, A)	9	9740	1.02 (0.95-1.09)	0.682	-	-	-	-	-	-	-	-
FGF20	rs1989754	chr8:16902846	C vs. G	C	8	6618	1.01 (0.91-1.12)	0.808	-	-	-	-	-	-	-	-
FGF20	rs1989754	chr8:16902846	C vs. G	All (C, A)	9	9846	0.99 (0.91-1.09)	0.85	-	-	-	-	-	-	-	-
FGF20	rs1989756	chr8:16903061	A vs. G	All (C only)	4	2900	1.02 (0.80-1.32)	0.857	-	-	-	-	-	-	-	-
FGF20	rs12718379	chr8:16904448	C vs. T	C	6	5930	0.98 (0.91-1.06)	0.635	-	-	-	-	-	-	-	-
FGF20	rs12718379	chr8:16904448	C vs. T	All (C, A)	7	9175	1.01 (0.94-1.09)	0.702	-	-	-	-	-	-	-	-
NAT2	rs1041983	chr8:18302075	T vs. C	All (C only)	4	3577	1.04 (0.94-1.15)	0.422	-	-	-	-	-	-	-	-
NAT2	rs1801280	chr8:18302134	C vs. T	All (C only)	4	3605	1.14 (0.88-1.49)	0.325	-	-	-	-	-	-	-	-
NAT2	rs1799929	chr8:18302274	T vs. C	C	7	4654	0.97 (0.87-1.09)	0.621	-	-	-	-	-	-	-	-
NAT2	rs1799929	chr8:18302274	T vs. C	All (C, O)	8	4856	0.98 (0.89-1.09)	0.749	-	-	-	-	-	-	-	-
NAT2	rs1799930	chr8:18302383	A vs. G	All (C, O)	9	4995	1.05 (0.95-1.17)	0.348	-	-	-	-	-	-	-	-
NAT2	rs1799930	chr8:18302383	A vs. G	C	8	4793	1.05 (0.93-1.18)	0.426	-	-	-	-	-	-	-	-
NAT2	rs1208	chr8:18302596	G vs. A	All (C only)	5	7922	1.03 (0.87-1.22)	0.759	-	-	-	-	-	-	-	-
NAT2	rs1799931	chr8:18302650	A vs. G	All (C, O)	8	4275	1.35 (0.84-2.17)	0.223	-	-	-	-	-	-	-	-
NAT2	rs1799931	chr8:18302650	A vs. G	C	7	4073	1.28 (0.73-2.26)	0.388	-	-	-	-	-	-	-	-
EPHX2	rs751141	chr8:27429782	A vs. G	All (C only)	4	7594	0.92 (0.82-1.03)	0.162	-	-	-	-	-	-	-	-
CSMD1	rs6992732	chr8:2911645	G vs. A	All (C only)	4	14258	1.05 (0.92-1.20)	0.445	-	-	-	-	-	-	-	-
CSMD1	rs17068332	chr8:3820589	A vs. G	All (C only)	4	16264	0.95 (0.82-1.10)	0.475	-	-	-	-	-	-	-	-
FAM150A	rs10504139	chr8:53607407	A vs. C	All (C only)	4	6267	0.93 (0.78-1.11)	0.437	-	-	-	-	-	-	-	-
GWA_8q12.3	rs10504370	chr8:65150536	C vs. T	All (C only)	4	16556	1.06 (0.86-1.30)	0.586	-	-	-	-	-	-	-	-
NBN	rs1805824*	chr8:91046082	A vs. G	All (C, A)	11	28182	1.03 (0.92-1.16)	0.584	-	-	-	-	-	-	-	-
NBN	rs1805824*	chr8:91046082	A vs. G	C	10	26425	1.02 (0.89-1.18)	0.746	-	-	-	-	-	-	-	-
DECR1	rs1805868	chr8:91112818	G vs. A	All (C, A)	4	6406	1.06 (0.88-1.27)	0.54	-	-	-	-	-	-	-	-
CALB1	rs1805874	chr8:91151238	C vs. A	All (C, A)	8	9637	0.94 (0.84-1.06)	0.317	-	-	-	-	-	-	-	-
CALB1	rs1805874	chr8:91151238	C vs. A	C	6	6398	1.01 (0.93-1.11)	0.762	-	-	-	-	-	-	-	-
CALB1	rs12171665	chr8:91168110	A vs. G	C	3	3802	0.92 (0.80-1.06)	0.265	-	-	-	-	-	-	-	-
CALB1	rs12171665	chr8:91168110	A vs. G	All (C, A)	4	5563	0.97 (0.85-1.10)	0.641	-	-	-	-	-	-	-	-
CALB1	rs2049815	chr8:91211649	T vs. G	C	3	3738	0.94 (0.83-1.06)	0.303	-	-	-	-	-	-	-	-
CALB1	rs2049815	chr8:91211649	T vs. G	All (C, A)	4	5471	0.99 (0.87-1.12)	0.828	-	-	-	-	-	-	-	-
HSPA5	rs17840761	chr9:127043800	T vs. C	All (C, A)	4	4009	1.02 (0.93-1.12)	0.654	-	-	-	-	-	-	-	-
LMX1B	rs4836551	chr9:128426446	T vs. C	All (C only)	4	5402	0.95 (0.82-1.11)	0.532	-	-	-	-	-	-	-	-
LMX1B	rs12555176	chr9:128454124	T vs. G	All (C only)	4	5206	1.06 (0.91-1.24)	0.462	-	-	-	-	-	-	-	-
LMX1B	rs7854658	chr9:128454759	A vs. G	All (C only)	4	5109	1.06 (0.96-1.17)	0.246	-	-	-	-	-	-	-	-
LMX1B	rs7864957	chr9:128459111	T vs. C	All (C only)	4	5793	1.02 (0.91-1.14)	0.768	-	-	-	-	-	-	-	-
LMX1B	rs10121915	chr9:128486853	A vs. G	All (C only)	4	5364	0.94 (0.81-1.09)	0.421	-	-	-	-	-	-	-	-
LMX1B	rs2277158	chr9:128493050	G vs. A	C	4	5393	0.93 (0.81-1.08)	0.336	-	-	-	-	-	-	-	-
LMX1B	rs2277158	chr9:128493050	G vs. A	All (C, A)	5	5774	0.98 (0.84-1.14)	0.794	-	-	-	-	-	-	-	-
LMX1B	rs13295990	chr9:128495408	C vs. G	All (C only)	4	5322	0.94 (0.82-1.08)	0.371	-	-	-	-	-	-	-	-
LMX1B	rs3737048	chr9:128497913	T vs. G	C	3	3995	0.95 (0.82-1.10)	0.515	-	-	-	-	-	-	-	-
LMX1B	rs3737048	chr9:128497913	T vs. G	All (C, A)	4	4374	1.01 (0.88-1.14)	0.946	-	-	-	-	-	-	-	-
LMX1B	rs10987413	chr9:128499259	A vs. G	All (C only)	4	5470	0.95 (0.82-1.10)	0.46	-	-	-	-	-	-	-	-
DBH	rs1611115	chr9:135490336	T vs. C	All (C, O)	9	10247	0.99 (0.87-1.11)	0.804	-	-	-	-	-	-	-	-
DBH	rs1611115	chr9:135490336	T vs. C	C	8	9568	0.99 (0.87-1.13)	0.905	-	-	-	-	-	-	-	-
TUSC1	rs4534200	chr9:25642508	C vs. T	All (C only)	4	16297	0.95 (0.87-1.04)	0.261	-	-	-	-	-	-	-	-
LINGO2	rs10968215	chr9:27930160	A vs. G	All (C only)	4	4750	0.93 (0.86-1.02)	0.125	-	-	-	-	-	-	-	-
LINGO2	rs10812774	chr9:28284231	A vs. G	All (C, A)	6	9620	0.98 (0.92-1.05)	0.586	-	-	-	-	-	-	-	-
LINGO2	rs10812774	chr9:28284231	A vs. G	C	4	8691	0.99 (0.93-1.06)	0.773	-	-	-	-	-	-	-	-
LINGO2	rs16912778	chr9:28364690	G vs. A	All (C only)	4	8777	1.00 (0.94-1.07)	0.981	-	-	-	-	-	-	-	-
LINGO2	rs4879257	chr9:28660038	A vs. T	All (C only)	4	4873	1.00 (0.91-1.10)	0.984	-	-	-	-	-	-	-	-
LINGO2	rs7033345	chr9:28707573	G vs. A	All (C, A)	5	5341	1.06 (0.96-1.18)	0.248	-	-	-	-	-	-	-	-
LINGO2	rs7033345	chr9:28707573	G vs. A	C	3	4412	1.01 (0.92-1.11)	0.858	-	-	-	-	-	-	-	-
C9orf156	rs3183927	chr9:99724578	C vs. T	All (C, A)	4	7881	1.05 (0.97-1.13)	0.211	-	-	-	-	-	-	-	-
C9orf156	rs3183927	chr9:99724578	C vs. T	C	3	7501	1.05 (0.95-1.16)	0.36	-	-	-	-	-	-	-	-
NDUFB8	rs1800662	chr10:102279068	A vs. C	All (C only)	4	4216	1.03 (0.91-1.16)	0.649	-	-	-	-	-	-	-	-
PITX3	rs2281983	chr10:103981371	G vs. A	All (C only)	8	8665	1.05 (0.98-1.12)	0.141	-	-	-	-	-	-	-	-
PITX3	rs733283	chr10:103986566	A vs. T	C	5	6194	1.04 (0.97-1.12)	0.279	-	-	-	-	-	-	-	-
PITX3	rs733283	chr10:103986566	A vs. T	All (C, A)	6	6574	1.04 (0.97-1.11)	0.319	-	-	-	-	-	-	-	-
PITX3	rs4919621*	chr10:103988661	A vs. T	All (C only)	12	28659	1.04 (0.99-1.08)	0.0932	-	-	-	-	-	-	-	-
PITX3	rs3758549	chr10:103994185	T vs. C	C	5	8906	0.92 (0.81-1.04)	0.16	-	-	-	-	-	-	-	-
PITX3	rs3758549	chr10:103994185	T vs. C	All (C, A)	6	9527	1.01 (0.84-1.21)	0.936	-	-	-	-	-	-	-	-
GBF1	rs1541046	chr10:103995376	C vs. T	All (C only)	4	8284	0.98 (0.84-1.16)	0.846	-	-	-	-	-	-	-	-
CYP17A1	rs17115100*	chr10:104581383	T vs. G	All (C only)	11	59311	0.89 (0.80-0.99)	0.0273	A	11565	C	69	C	Low OR	C	<1
C10orf32	rs3824754*	chr10:104604340	A vs. G	All (C only)	11	59300	0.88 (0.80-0.98)	0.0193	A	12000	C	68	C	Low OR	C	<1
C10orf32	rs4409766*	chr10:104606653	C vs. T	All (C only)	11	59269	0.88 (0.80-0.98)	0.0199	A	11989	C	69	C	Low OR	C	<1
C10orf32	rs11191425*	chr10:104615960	T vs. C	All (C only)	11	59319	0.88 (0.80-0.98)	0.0201	A	11959	C	69	C	Low OR	C	<1
CNNM2	rs12413409*	chr10:104709086	A vs. G	All (C only)	11	59027	0.88 (0.78-0.98)	0.0188	A	10826	C	68	C	Low OR	C	<1
GSTO1	rs11191972	chr10:105997513	T vs. C	C	3	3690	0.93 (0.80-1.07)	0.317	-	-	-	-	-	-	-	-
GSTO1	rs11191972	chr10:105997513	T vs. C	All (C, A)	4	4298	0.96 (0.83-1.10)	0.531	-	-	-	-	-	-	-	-
GSTO1	rs4925	chr10:106012779	A vs. C	C	6	5501	0.92 (0.82-1.03)	0.132	-	-	-	-	-	-	-	-
GSTO1	rs4925	chr10:106012779	A vs. C	All (C, A)	8	6488	0.95 (0.84-1.07)	0.415	-	-	-	-	-	-	-	-
GSTO2	rs2297235	chr10:106024481	C vs. T	C	4	4152	0.91 (0.79-1.04)	0.163	-	-	-	-	-	-	-	-
GSTO2	rs2297235	chr10:106024481	C vs. T	All (C, A)	6	5378	0.96 (0.85-1.08)	0.494	-	-	-	-	-	-	-	-
GSTO2	rs156697	chr10:106029175	C vs. T	C	3	7697	0.96 (0.89-1.03)	0.272	-	-	-	-	-	-	-	-
GSTO2	rs156697	chr10:106029175	C vs. T	All (C, A)	4	8303	0.97 (0.90-1.04)	0.381	-	-	-	-	-	-	-	-
CAMK1D	rs1892302	chr10:12486578	A vs. G	All (C only)	4	16973	1.04 (0.96-1.13)	0.333	-	-	-	-	-	-	-	-
CAMK1D	rs2724788	chr10:12490835	A vs. G	All (C only)	4	16188	1.04 (0.94-1.15)	0.422	-	-	-	-	-	-	-	-
CYP2E1	rs2031920	chr10:135189835	C2 vs. C1	All (C, A, O)	4	1255	1.20 (0.86-1.67)	0.278	-	-	-	-	-	-	-	-
ITGA8	rs7077361*	chr10:15601549	C vs. T	All (C only)	11	61036	0.88 (0.84-0.92)	1.51e-08	A	15028	n.a.	0	n.a.	Low OR	A	5.7
GWA_10p11.21	rs12255903	chr10:35269643	T vs. C	All (C only)	4	15423	1.00 (0.85-1.16)	0.969	-	-	-	-	-	-	-	-
GWA_10p11.21	rs6481928	chr10:35276450	G vs. A	All (C only)	4	15427	1.00 (0.85-1.17)	0.971	-	-	-	-	-	-	-	-
GWA_10p11.21	rs7897198	chr10:35277737	T vs. C	All (C only)	4	17618	1.00 (0.86-1.17)	0.966	-	-	-	-	-	-	-	-
CUL2	rs7920095	chr10:35343340	A vs. G	All (C only)	4	17679	1.04 (0.92-1.19)	0.541	-	-	-	-	-	-	-	-
CUL2	rs7923172	chr10:35349373	A vs. G	All (C only)	4	18753	1.04 (0.91-1.19)	0.587	-	-	-	-	-	-	-	-
CUL2	rs11595898	chr10:35366269	C vs. T	All (C only)	4	15624	1.03 (0.90-1.19)	0.641	-	-	-	-	-	-	-	-
CUL2	rs4934704	chr10:35372170	T vs. C	All (C only)	4	18100	1.04 (0.91-1.19)	0.586	-	-	-	-	-	-	-	-
CUL2	rs1926554	chr10:35384975	A vs. G	All (C only)	4	15751	1.03 (0.90-1.18)	0.675	-	-	-	-	-	-	-	-
CUL2	rs7099036	chr10:35389580	T vs. C	All (C only)	4	15367	1.03 (0.90-1.19)	0.658	-	-	-	-	-	-	-	-
CUL2	rs11593858	chr10:35421379	A vs. G	All (C only)	4	18093	1.04 (0.91-1.19)	0.6	-	-	-	-	-	-	-	-
CUL2	rs12768019	chr10:35429849	C vs. T	All (C only)	4	18091	1.04 (0.91-1.19)	0.599	-	-	-	-	-	-	-	-
CUL2	rs4934724	chr10:35433675	T vs. C	All (C only)	4	15609	1.03 (0.89-1.18)	0.708	-	-	-	-	-	-	-	-
CREM	rs10827492	chr10:35469831	T vs. C	All (C only)	4	17551	1.04 (0.90-1.19)	0.601	-	-	-	-	-	-	-	-
CREM	rs4934540	chr10:35514705	C vs. T	All (C only)	4	15361	1.04 (0.90-1.19)	0.612	-	-	-	-	-	-	-	-
CCNY	rs3936503	chr10:35589263	A vs. G	All (C only)	4	32789	1.06 (0.94-1.20)	0.339	-	-	-	-	-	-	-	-
GWA_10q21.1	rs35866326*	chr10:58986929	G vs. C	C	24	65394	0.96 (0.90-1.03)	0.25	-	-	-	-	-	-	-	-
GWA_10q21.1	rs35866326*	chr10:58986929	G vs. C	All (C, A, O)	30	67300	0.97 (0.91-1.04)	0.384	-	-	-	-	-	-	-	-
TFAM	rs1937	chr10:59815348	C vs. G	All (C only)	5	4147	1.01 (0.84-1.20)	0.948	-	-	-	-	-	-	-	-
TFAM	rs2306604	chr10:59818698	G vs. A	All (C only)	4	8158	1.05 (0.93-1.19)	0.419	-	-	-	-	-	-	-	-
IL2RA	rs11256442*	chr10:6119350	A vs. G	All (C only)	9	57884	1.04 (0.97-1.11)	0.269	-	-	-	-	-	-	-	-
IL2RA	rs11256448	chr10:6119485	G vs. A	All (C only)	4	12441	1.09 (0.97-1.22)	0.151	-	-	-	-	-	-	-	-
LOC100507127	rs10905042	chr10:6933911	C vs. T	All (C only)	4	15603	1.13 (0.93-1.36)	0.224	-	-	-	-	-	-	-	-
STOX1	rs16925839	chr10:70277867	T vs. C	All (C only)	4	14483	1.02 (0.90-1.15)	0.744	-	-	-	-	-	-	-	-
SNCG	rs1800373	chr10:88708416	A vs. C	All (C only)	4	3947	0.99 (0.91-1.08)	0.839	-	-	-	-	-	-	-	-
SNCG	rs760113	chr10:88709769	G vs. C	All (C only)	5	4439	1.00 (0.91-1.10)	0.947	-	-	-	-	-	-	-	-
SNCG	rs9864	chr10:88712378	T vs. A	All (C only)	5	4435	0.99 (0.90-1.09)	0.847	-	-	-	-	-	-	-	-
IDE	rs967878	chr10:94169328	T vs. G	All (C only)	4	4189	0.99 (0.91-1.08)	0.813	-	-	-	-	-	-	-	-
KIF11	rs1544210	chr10:94477781	C vs. T	All (C only)	4	4311	0.99 (0.91-1.08)	0.84	-	-	-	-	-	-	-	-
CYP2C19	rs4244285	chr10:96531606	A vs. G	All (C, A)	4	3710	1.11 (0.87-1.43)	0.401	-	-	-	-	-	-	-	-
CYP2C19	rs4244285	chr10:96531606	A vs. G	C	3	3583	1.03 (0.83-1.29)	0.787	-	-	-	-	-	-	-	-
CYP2C9	rs1057910	chr10:96731043	C vs. A	C	3	3661	0.80 (0.51-1.26)	0.335	-	-	-	-	-	-	-	-
CYP2C9	rs1057910	chr10:96731043	C vs. A	All (C, A)	4	4136	0.86 (0.58-1.27)	0.444	-	-	-	-	-	-	-	-
NCAM1	rs2288158	chr11:112638886	G vs. T	C	3	7446	1.03 (0.93-1.14)	0.604	-	-	-	-	-	-	-	-
NCAM1	rs2288158	chr11:112638886	G vs. T	All (C, A)	4	7826	1.02 (0.92-1.12)	0.732	-	-	-	-	-	-	-	-
ANKK1	rs1800497*	chr11:112776038	T vs. C	All (C, A, O)	20	65098	1.06 (1.02-1.11)	0.00776	A	25799	A	18	C	Low OR	C	<1
ANKK1	rs1800497*	chr11:112776038	T vs. C	C	15	62593	1.07 (1.02-1.12)	0.0105	A	23978	B	32	C	Low OR, Regr	C	<1
DRD2	rs2234689	chr11:112783693	G vs. C	All (C, O)	4	4086	1.01 (0.90-1.13)	0.845	-	-	-	-	-	-	-	-
DRD2	rs6279	chr11:112786283	G vs. C	C	3	3686	1.06 (0.95-1.17)	0.308	-	-	-	-	-	-	-	-
DRD2	rs6279	chr11:112786283	G vs. C	All (C, A)	4	4065	1.04 (0.94-1.14)	0.461	-	-	-	-	-	-	-	-
DRD2	rs1801028	chr11:112788694	C vs. G	All (C, A, O)	6	4087	1.14 (0.88-1.47)	0.328	-	-	-	-	-	-	-	-
DRD2	rs1801028	chr11:112788694	C vs. G	C	3	2991	0.92 (0.63-1.35)	0.677	-	-	-	-	-	-	-	-
DRD2	rs2075654	chr11:112794276	A vs. G	All (C, A)	4	3954	0.99 (0.87-1.11)	0.83	-	-	-	-	-	-	-	-
DRD2	rs2075654	chr11:112794276	A vs. G	C	3	3574	1.01 (0.88-1.15)	0.917	-	-	-	-	-	-	-	-
DRD2	rs1800498	chr11:112796798	T vs. C	All (C, O)	4	4129	1.00 (0.92-1.10)	0.949	-	-	-	-	-	-	-	-
DRD2	rs1079597*	chr11:112801496	A vs. G	All (C, A, O)	17	63562	1.07 (1.01-1.12)	0.0116	A	19878	A	20	C	Low OR, Regr	C	<1
DRD2	rs1079597*	chr11:112801496	A vs. G	C	13	62015	1.06 (1.00-1.11)	0.0486	A	18772	B	28	C	Low OR, F, HWE, Regr	C	<1
DRD2	rs1799732	chr11:112851462	Del vs. Ins	All (C, O)	4	2015	0.94 (0.76-1.17)	0.581	-	-	-	-	-	-	-	-
RRAS2	rs2970332	chr11:14317011	G vs. A	All (C, A)	5	4806	0.95 (0.83-1.10)	0.519	-	-	-	-	-	-	-	-
RRAS2	rs2970332	chr11:14317011	G vs. A	C	4	4042	1.02 (0.89-1.16)	0.821	-	-	-	-	-	-	-	-
CTSD	rs17571	chr11:1739170	T vs. C	All (C, A)	4	9671	1.03 (0.90-1.17)	0.662	-	-	-	-	-	-	-	-
CTSD	rs17571	chr11:1739170	T vs. C	C	3	8001	1.02 (0.86-1.21)	0.831	-	-	-	-	-	-	-	-
TH	rs6356	chr11:2147527	A vs. G	All (C, A, O)	4	7906	1.01 (0.94-1.09)	0.706	-	-	-	-	-	-	-	-
BDNF	rs7124442	chr11:27633617	C vs. T	All (C only)	4	3807	0.91 (0.80-1.05)	0.195	-	-	-	-	-	-	-	-
BDNF	rs6265*	chr11:27636492	A vs. G	All (C, A, O)	23	65315	1.03 (0.98-1.09)	0.24	-	-	-	-	-	-	-	-
BDNF	rs6265*	chr11:27636492	A vs. G	C	16	61809	1.03 (0.97-1.10)	0.316	-	-	-	-	-	-	-	-
BDNF	rs6265	chr11:27636492	A vs. G	A	6	3270	1.03 (0.89-1.18)	0.701	-	-	-	-	-	-	-	-
BDNF	rs11030104	chr11:27641093	G vs. A	All (C only)	5	8375	1.1 (0.97-1.24)	0.135	-	-	-	-	-	-	-	-
BDNF	rs2049045	chr11:27650817	C vs. G	All (C only)	4	3955	1.1 (0.95-1.29)	0.213	-	-	-	-	-	-	-	-
BDNF	rs7103411*	chr11:27656701	C vs. T	All (C only)	12	59782	1.02 (0.97-1.08)	0.397	-	-	-	-	-	-	-	-
BDNF	rs7127507*	chr11:27671460	C vs. T	All (C only)	12	59414	0.97 (0.94-1.02)	0.224	-	-	-	-	-	-	-	-
BDNF	rs11030121*	chr11:27692783	T vs. C	All (C only)	12	59509	0.97 (0.93-1.01)	0.192	-	-	-	-	-	-	-	-
ATHL1	rs3809109	chr11:280233	G vs. A	All (C only)	4	16808	1.04 (0.94-1.15)	0.457	-	-	-	-	-	-	-	-
ATHL1	rs2242565	chr11:285343	G vs. A	All (C only)	4	12810	1.07 (0.86-1.33)	0.533	-	-	-	-	-	-	-	-
C11orf74	rs12294719	chr11:36684837	C vs. T	All (C only)	4	15268	0.90 (0.72-1.13)	0.375	-	-	-	-	-	-	-	-
C11orf74	rs1533588	chr11:36687460	G vs. A	All (C only)	4	10408	0.90 (0.74-1.09)	0.263	-	-	-	-	-	-	-	-
SERPING1	rs1005511	chr11:57123232	A vs. G	All (C only)	4	15483	1.04 (0.93-1.17)	0.45	-	-	-	-	-	-	-	-
FADS2	rs174570	chr11:61353788	T vs. C	C	3	7487	1.01 (0.90-1.12)	0.931	-	-	-	-	-	-	-	-
FADS2	rs174570	chr11:61353788	T vs. C	All (C, A)	4	7867	1.00 (0.91-1.11)	0.966	-	-	-	-	-	-	-	-
DRD4	rs1800955	chr11:626784	C vs. T	All (C, O)	4	3514	1.00 (0.90-1.11)	0.926	-	-	-	-	-	-	-	-
GSTP1	rs1695	chr11:67109265	G vs. A	C	7	7114	1.04 (0.92-1.18)	0.549	-	-	-	-	-	-	-	-
GSTP1	rs1695	chr11:67109265	G vs. A	All (C, A, O)	9	7892	1.01 (0.91-1.13)	0.808	-	-	-	-	-	-	-	-
GSTP1	rs1138272	chr11:67110155	T vs. C	All (C only)	6	6979	0.99 (0.87-1.12)	0.862	-	-	-	-	-	-	-	-
PRKRIR	rs12295401	chr11:75709727	T vs. C	All (C only)	4	17659	1.16 (0.97-1.39)	0.114	-	-	-	-	-	-	-	-
RIC3	rs4340037	chr11:8084734	C vs. A	All (C only)	4	31891	0.95 (0.83-1.09)	0.448	-	-	-	-	-	-	-	-
GWA_11q21	rs3018626	chr11:96093408	T vs. G	C	11	12755	1.01 (0.93-1.10)	0.844	-	-	-	-	-	-	-	-
GWA_11q21	rs3018626	chr11:96093408	T vs. G	All (C, A)	12	13155	1.01 (0.93-1.09)	0.897	-	-	-	-	-	-	-	-
GWA_12q23.3	rs4964469*	chr12:105474117	A vs. G	All (C only)	11	62736	1.05 (1.00-1.10)	0.0802	-	-	-	-	-	-	-	-
NOS1	rs2682826	chr12:116137221	T vs. C	All (C only)	6	9054	1.04 (0.92-1.18)	0.571	-	-	-	-	-	-	-	-
NOS1	rs1047735	chr12:116169653	T vs. C	All (C only)	4	4036	1.00 (0.91-1.10)	0.965	-	-	-	-	-	-	-	-
ETV6	rs10505762	chr12:11881877	T vs. C	All (C only)	4	12808	1.13 (0.95-1.34)	0.181	-	-	-	-	-	-	-	-
CCDC62/HIP1R	rs12817488*	chr12:121862247	A vs. G	All (C only)	6	19168	1.15 (1.08-1.22)	2.83e-05	A	17885	B	44	C	Low OR	C	2.7
CCDC62/HIP1R	rs10847864*	chr12:121892551	T vs. G	All (C, A)	27	39935	1.15 (1.11-1.18)	1.29e-17	A	32024	n.a.	0	n.a.	Low OR	A	14.4
CCDC62/HIP1R	rs10847864*	chr12:121892551	T vs. G	C	23	38367	1.15 (1.11-1.18)	4.37e-17	A	30287	n.a.	0	n.a.	Low OR	A	13.9
CCDC62/HIP1R	rs10847864*	chr12:121892551	T vs. G	A	4	1568	1.13 (0.97-1.30)	0.117	-	-	-	-	-	-	-	-
GRIN2B	rs1806201	chr12:13608775	T vs. C	All (C, A)	5	8406	0.97 (0.88-1.07)	0.515	-	-	-	-	-	-	-	-
GRIN2B	rs1806201	chr12:13608775	T vs. C	A	3	1471	0.97 (0.83-1.14)	0.727	-	-	-	-	-	-	-	-
GWA_12q12	rs4508240	chr12:37186069	G vs. A	All (C only)	4	16657	1.05 (0.89-1.24)	0.585	-	-	-	-	-	-	-	-
GWA_12q12	rs974627	chr12:37205791	T vs. C	All (C only)	4	19431	1.05 (0.89-1.24)	0.578	-	-	-	-	-	-	-	-
LRRK2	rs1994090	chr12:38714828	G vs. T	A	5	22865	1.45 (1.29-1.63)	6.31e-10	A	3653	n.a.	16	n.a.	-	A	6.7
LRRK2	rs1994090	chr12:38714828	G vs. T	All (C, A)	9	40659	1.24 (1.11-1.38)	0.000124	A	11510	C	75	C	Regr	C	2.1
LRRK2	rs1994090	chr12:38714828	G vs. T	C	4	17794	1.07 (1.01-1.13)	0.0192	A	7857	A	0	C	Low OR	C	<1
LRRK2	rs11564162	chr12:38729159	G vs. A	All (C only)	4	19550	0.95 (0.83-1.09)	0.458	-	-	-	-	-	-	-	-
LRRK2	rs7304279	chr12:38752209	T vs. C	A	5	22867	1.42 (1.27-1.58)	1.13e-10	A	3610	n.a.	0	n.a.	-	A	7.4
LRRK2	rs7304279	chr12:38752209	T vs. C	All (C, A)	8	33804	1.28 (1.16-1.42)	1.27e-06	A	6986	C	52	C	Regr	C	3.9
LRRK2	rs7304279	chr12:38752209	T vs. C	C	3	10937	1.14 (1.06-1.23)	0.000919	A	3376	A	0	C	Low OR	C	1.3
LRRK2	rs4768212	chr12:38760414	C vs. T	A	3	20392	1.36 (1.21-1.54)	6.18e-07	A	3375	A	9	A	-	A	4.1
LRRK2	rs4768212	chr12:38760414	C vs. T	All (C, A)	6	31331	1.20 (1.05-1.36)	0.00672	A	4933	C	60	A	-	C	<1
LRRK2	rs4768212	chr12:38760414	C vs. T	C	3	10939	1.06 (0.95-1.18)	0.321	-	-	-	-	-	-	-	-
LRRK2	rs2708453	chr12:38764919	T vs. G	All (C, A)	7	34520	1.22 (1.13-1.31)	4.83e-07	A	15709	B	36	C	Regr	C	4.3
LRRK2	rs2708453	chr12:38764919	T vs. G	A	3	20393	1.37 (1.20-1.56)	3.57e-06	A	3389	A	22	A	-	A	3.4
LRRK2	rs2708453	chr12:38764919	T vs. G	C	4	14127	1.15 (1.07-1.23)	6.33e-05	A	12320	A	0	C	Low OR	C	2.4
LRRK2	rs2896905	chr12:38779683	A vs. G	All (C only)	5	23135	0.94 (0.87-1.02)	0.152	-	-	-	-	-	-	-	-
LRRK2	rs2046932	chr12:38866707	T vs. C	A	5	22862	1.53 (1.29-1.81)	1.11e-06	A	3652	C	55	C	Regr	C	3.6
LRRK2	rs2046932	chr12:38866707	T vs. C	All (C, A)	7	30072	1.39 (1.18-1.63)	6.14e-05	A	14555	C	68	A	-	C	2.3
LRRK2	rs1491923	chr12:38877384	C vs. T	All (C only)	6	24117	1.09 (1.04-1.14)	0.000246	A	15314	A	13	C	Low OR	C	1.7
LRRK2	rs11564273*	chr12:38884419	G vs. T	All (C only)	14	35756	1.28 (1.19-1.38)	6.72e-11	A	5816	n.a.	34	n.a.	Regr	A	7.9
LRRK2	rs2638230	chr12:38890342	T vs. G	All (C only)	4	4729	0.71 (0.39-1.32)	0.281	-	-	-	-	-	-	-	-
LRRK2	rs2201144	chr12:38897130	G vs. A	All (C only)	4	3557	0.94 (0.77-1.16)	0.583	-	-	-	-	-	-	-	-
LRRK2	rs1388598	chr12:38902433	A vs. G	All (C, A)	4	4495	0.91 (0.74-1.10)	0.326	-	-	-	-	-	-	-	-
LRRK2	rs1388598	chr12:38902433	A vs. G	C	3	3595	0.98 (0.78-1.22)	0.853	-	-	-	-	-	-	-	-
LRRK2	rs7294619	chr12:38903469	C vs. T	All (C only)	4	4987	1.14 (1.01-1.29)	0.032	A	1245	A	0	C	Low OR	C	<1
LRRK2	rs1491942*	chr12:38907075	G vs. C	All (C, A)	25	35626	1.17 (1.13-1.22)	2.44e-15	A	15313	n.a.	0	n.a.	-	A	12.2
LRRK2	rs1491942*	chr12:38907075	G vs. C	C	21	34123	1.17 (1.13-1.22)	6.44e-15	A	14106	n.a.	0	n.a.	-	A	11.8
LRRK2	rs1491942*	chr12:38907075	G vs. C	A	4	1503	1.12 (0.96-1.31)	0.14	-	-	-	-	-	-	-	-
LRRK2	rs1491941	chr12:38907082	C vs. T	All (C, A)	9	7841	0.94 (0.88-1.01)	0.0993	-	-	-	-	-	-	-	-
LRRK2	rs1491941	chr12:38907082	C vs. T	C	8	6936	0.96 (0.89-1.03)	0.228	-	-	-	-	-	-	-	-
LRRK2	rs10878244	chr12:38917875	A vs. G	All (C only)	6	5407	1.04 (0.92-1.18)	0.504	-	-	-	-	-	-	-	-
LRRK2	rs10878245	chr12:38918058	A vs. G	All (C, A, D, O)	11	7646	0.99 (0.93-1.06)	0.828	-	-	-	-	-	-	-	-
LRRK2	rs10878245	chr12:38918058	A vs. G	C	8	6513	1.00 (0.93-1.08)	0.972	-	-	-	-	-	-	-	-
LRRK2	rs10878247	chr12:38918367	A vs. G	All (C only)	4	7566	0.96 (0.88-1.06)	0.423	-	-	-	-	-	-	-	-
LRRK2	rs10784444	chr12:38919755	G vs. A	All (C only)	4	4640	0.93 (0.86-1.02)	0.121	-	-	-	-	-	-	-	-
LRRK2	rs6581622	chr12:38920425	C vs. T	All (C only)	5	5587	0.96 (0.88-1.04)	0.274	-	-	-	-	-	-	-	-
LRRK2	rs2404580	chr12:38925828	A vs. G	All (C only)	4	8445	1.00 (0.93-1.07)	0.904	-	-	-	-	-	-	-	-
LRRK2	rs10878258	chr12:38927959	G vs. A	All (C only)	5	4457	0.99 (0.88-1.12)	0.909	-	-	-	-	-	-	-	-
LRRK2	rs7955902	chr12:38931524	A vs. C	All (C only)	7	6958	1.01 (0.94-1.08)	0.776	-	-	-	-	-	-	-	-
LRRK2	rs1491939	chr12:38931863	C vs. T	All (C only)	5	5473	1.11 (0.86-1.43)	0.427	-	-	-	-	-	-	-	-
LRRK2	rs1491938	chr12:38931897	G vs. A	All (C, A)	6	9228	1.01 (0.95-1.08)	0.725	-	-	-	-	-	-	-	-
LRRK2	rs1491938	chr12:38931897	G vs. A	C	5	8339	1.00 (0.94-1.07)	0.935	-	-	-	-	-	-	-	-
LRRK2	rs7132171	chr12:38936016	G vs. C	All (C only)	6	5621	0.97 (0.90-1.05)	0.506	-	-	-	-	-	-	-	-
LRRK2	rs10784451	chr12:38936155	A vs. G	All (C only)	6	5279	0.92 (0.83-1.02)	0.104	-	-	-	-	-	-	-	-
LRRK2	rs1907633	chr12:38936618	A vs. G	All (C only)	4	4933	1.05 (0.88-1.25)	0.586	-	-	-	-	-	-	-	-
LRRK2	rs2046928	chr12:38938661	G vs. A	All (C only)	5	4724	0.99 (0.87-1.14)	0.928	-	-	-	-	-	-	-	-
LRRK2	rs2723264	chr12:38938787	A vs. G	All (C only)	4	7608	0.95 (0.87-1.04)	0.295	-	-	-	-	-	-	-	-
LRRK2	rs4293189	chr12:38943492	A vs. G	All (C only)	5	4849	1.08 (0.98-1.18)	0.128	-	-	-	-	-	-	-	-
LRRK2	rs10784461	chr12:38943804	G vs. A	All (C only)	4	3739	1.10 (1.00-1.20)	0.0498	A	3552	A	0	C	Low OR	C	<1
LRRK2	rs7308720	chr12:38943967	G vs. C	A	4	2614	0.74 (0.60-0.91)	0.00508	B	435	A	10	A	-	B	<1
LRRK2	rs7308720	chr12:38943967	G vs. C	All (C, A, D, O)	11	7684	0.86 (0.76-0.98)	0.0194	A	1132	A	3	A	-	A	<1
LRRK2	rs7308720	chr12:38943967	G vs. C	C	5	4428	0.93 (0.78-1.10)	0.383	-	-	-	-	-	-	-	-
LRRK2	rs4768224	chr12:38947670	A vs. T	All (C only)	5	4338	0.92 (0.84-1.01)	0.0751	-	-	-	-	-	-	-	-
LRRK2	rs11564207	chr12:38950910	A vs. T	All (C only)	5	4231	1.17 (1.04-1.32)	0.00984	A	1664	A	0	A	-	A	<1
LRRK2	rs7308193	chr12:38951494	G vs. C	All (C only)	5	4759	0.96 (0.86-1.08)	0.514	-	-	-	-	-	-	-	-
LRRK2	rs10878299	chr12:38953142	G vs. C	All (C only)	4	3720	0.95 (0.78-1.14)	0.561	-	-	-	-	-	-	-	-
LRRK2	rs7971935	chr12:38956661	A vs. G	All (C only)	5	4298	0.97 (0.84-1.11)	0.638	-	-	-	-	-	-	-	-
LRRK2	rs4272849	chr12:38957068	A vs. G	All (C only)	4	3840	1.12 (1.02-1.22)	0.0158	A	3665	A	0	C	Low OR	C	<1
LRRK2	rs10506151	chr12:38957265	A vs. C	C	4	8286	0.94 (0.85-1.04)	0.195	-	-	-	-	-	-	-	-
LRRK2	rs10506151	chr12:38957265	A vs. C	All (C, A)	5	9169	1.05 (0.87-1.27)	0.604	-	-	-	-	-	-	-	-
LRRK2	rs10878307	chr12:38958256	G vs. A	C	6	9416	0.98 (0.87-1.11)	0.761	-	-	-	-	-	-	-	-
LRRK2	rs10878307	chr12:38958256	G vs. A	All (C, A, O)	8	10445	0.99 (0.88-1.11)	0.865	-	-	-	-	-	-	-	-
LRRK2	rs10784486	chr12:38963296	A vs. C	All (C, A)	7	7185	0.91 (0.84-0.99)	0.0344	A	4948	B	31	C	Low OR	C	<1
LRRK2	rs10784486	chr12:38963296	A vs. C	C	6	6291	0.90 (0.82-1.00)	0.0545	-	-	-	-	-	-	-	-
LRRK2	rs34410987	chr12:38963966	T vs. C	All (A only)	5	4680	1.15 (0.45-2.94)	0.774	-	-	-	-	-	-	-	-
LRRK2	rs4318033	chr12:38967208	G vs. A	All (C only)	5	4641	0.93 (0.78-1.11)	0.424	-	-	-	-	-	-	-	-
LRRK2	rs7957754	chr12:38972305	T vs. G	All (C only)	4	3846	1.12 (1.02-1.22)	0.0143	A	3684	A	0	C	Low OR	C	<1
LRRK2	rs7966550	chr12:38974962	C vs. T	All (C, A, D, O)	10	10484	0.94 (0.86-1.02)	0.148	-	-	-	-	-	-	-	-
LRRK2	rs7966550	chr12:38974962	C vs. T	C	7	9351	0.94 (0.85-1.03)	0.169	-	-	-	-	-	-	-	-
LRRK2	rs10784498	chr12:38983701	T vs. C	All (C only)	6	9367	1.06 (0.99-1.14)	0.0793	-	-	-	-	-	-	-	-
LRRK2	rs7133914	chr12:38989178	A vs. G	A	5	3496	0.76 (0.64-0.90)	0.00156	B	594	A	0	A	-	B	1.2
LRRK2	rs7133914	chr12:38989178	A vs. G	All (C, A, D, O)	16	11439	0.91 (0.82-1.01)	0.0799	-	-	-	-	-	-	-	-
LRRK2	rs7133914	chr12:38989178	A vs. G	C	9	7302	1.00 (0.88-1.14)	0.953	-	-	-	-	-	-	-	-
LRRK2	rs11175964	chr12:38989254	A vs. G	All (C, A, D, O)	6	8836	0.90 (0.69-1.17)	0.424	-	-	-	-	-	-	-	-
LRRK2	rs11175964	chr12:38989254	A vs. G	C	3	7698	1.03 (0.79-1.34)	0.839	-	-	-	-	-	-	-	-
LRRK2	rs10467144	chr12:38993468	A vs. G	All (C only)	4	4615	0.93 (0.86-1.01)	0.0892	-	-	-	-	-	-	-	-
LRRK2	rs35507033	chr12:38994045	A vs. G	All (C, O)	6	3207	1.51 (0.82-2.81)	0.188	-	-	-	-	-	-	-	-
LRRK2	rs35507033	chr12:38994045	A vs. G	C	5	2678	1.52 (0.76-3.03)	0.232	-	-	-	-	-	-	-	-
LRRK2	rs33958906	chr12:38994128	T vs. C	All (C only)	4	4146	0.99 (0.74-1.32)	0.96	-	-	-	-	-	-	-	-
LRRK2	rs1427263	chr12:39000101	G vs. T	All (C, A, D, O)	10	7772	0.95 (0.87-1.03)	0.24	-	-	-	-	-	-	-	-
LRRK2	rs1427263	chr12:39000101	G vs. T	C	6	6035	0.95 (0.86-1.04)	0.258	-	-	-	-	-	-	-	-
LRRK2	rs33949390	chr12:39000112	C vs. G	A	8	5957	2.13 (1.67-2.73)	1.51e-09	B	337	n.a.	0	n.a.	-	B	4.8
LRRK2	rs33949390	chr12:39000112	C vs. G	All (A, O)	9	6249	2.05 (1.55-2.71)	4.68e-07	B	346	A	20	A	-	B	2.9
LRRK2	rs11176013	chr12:39000140	A vs. G	A	3	1598	1.05 (0.91-1.21)	0.515	-	-	-	-	-	-	-	-
LRRK2	rs11176013	chr12:39000140	A vs. G	All (C, A, D, O)	8	6379	1.01 (0.94-1.09)	0.736	-	-	-	-	-	-	-	-
LRRK2	rs11176013	chr12:39000140	A vs. G	C	3	4148	0.99 (0.89-1.11)	0.916	-	-	-	-	-	-	-	-
LRRK2	rs35303786	chr12:39000166	C vs. T	All (C, O)	4	2633	1.51 (0.95-2.40)	0.0837	-	-	-	-	-	-	-	-
LRRK2	rs35303786	chr12:39000166	C vs. T	C	3	2104	1.42 (0.88-2.30)	0.15	-	-	-	-	-	-	-	-
LRRK2	rs11564148	chr12:39000168	A vs. T	A	6	3938	1.21 (1.10-1.33)	5.33e-05	A	2905	A	0	A	-	A	2.5
LRRK2	rs11564148	chr12:39000168	A vs. T	All (C, A, D, O)	14	10122	1.05 (0.96-1.15)	0.265	-	-	-	-	-	-	-	-
LRRK2	rs11564148	chr12:39000168	A vs. T	C	6	5559	0.97 (0.88-1.06)	0.493	-	-	-	-	-	-	-	-
LRRK2	rs11564205	chr12:39000276	G vs. A	All (C only)	4	4563	1.10 (0.97-1.25)	0.142	-	-	-	-	-	-	-	-
LRRK2	rs4768230	chr12:39001569	A vs. G	All (C only)	4	5088	1.00 (0.92-1.09)	0.944	-	-	-	-	-	-	-	-
LRRK2	rs10878371	chr12:39002527	T vs. C	C	3	4014	0.95 (0.87-1.04)	0.251	-	-	-	-	-	-	-	-
LRRK2	rs10878371	chr12:39002527	T vs. C	All (C, A, D, O)	6	5149	0.96 (0.86-1.07)	0.41	-	-	-	-	-	-	-	-
LRRK2	rs11176052	chr12:39010167	T vs. C	All (C only)	4	8752	1.09 (1.01-1.18)	0.0211	A	7333	A	0	C	Low OR	C	<1
LRRK2	rs7307562	chr12:39011227	T vs. G	All (C only)	4	8418	1.00 (0.89-1.11)	0.933	-	-	-	-	-	-	-	-
LRRK2	rs10506153	chr12:39011838	C vs. T	All (C only)	4	4608	1.10 (0.98-1.24)	0.0998	-	-	-	-	-	-	-	-
LRRK2	rs10878386	chr12:39012195	G vs. A	All (C only)	4	7451	0.92 (0.79-1.07)	0.256	-	-	-	-	-	-	-	-
LRRK2	rs2404834	chr12:39015274	A vs. G	All (C only)	5	4722	0.96 (0.85-1.08)	0.479	-	-	-	-	-	-	-	-
LRRK2	rs2404835	chr12:39016730	T vs. C	All (C only)	4	8501	0.98 (0.91-1.05)	0.48	-	-	-	-	-	-	-	-
LRRK2	rs715403	chr12:39017450	C vs. A	All (C only)	4	4771	0.90 (0.82-0.98)	0.0143	A	3152	A	0	C	Low OR	C	<1
LRRK2	rs1427272	chr12:39018747	G vs. C	All (C only)	4	4667	1.08 (0.96-1.22)	0.184	-	-	-	-	-	-	-	-
LRRK2	rs1427273	chr12:39018997	C vs. G	All (C only)	7	6396	1.01 (0.85-1.19)	0.921	-	-	-	-	-	-	-	-
LRRK2	rs10735934	chr12:39019167	C vs. A	All (C only)	4	8486	0.96 (0.90-1.04)	0.31	-	-	-	-	-	-	-	-
LRRK2	rs10732751	chr12:39019349	A vs. G	All (C only)	4	4666	1.09 (0.97-1.22)	0.165	-	-	-	-	-	-	-	-
LRRK2	rs1365763	chr12:39020850	T vs. C	All (C, A)	6	6254	1.09 (0.96-1.24)	0.187	-	-	-	-	-	-	-	-
LRRK2	rs1365763	chr12:39020850	T vs. C	C	5	5349	1.06 (0.95-1.19)	0.277	-	-	-	-	-	-	-	-
LRRK2	rs7963697	chr12:39021183	C vs. A	All (C only)	4	4643	1.07 (0.95-1.22)	0.264	-	-	-	-	-	-	-	-
LRRK2	rs7963086	chr12:39021436	G vs. C	All (C only)	4	4637	1.07 (0.94-1.22)	0.292	-	-	-	-	-	-	-	-
LRRK2	rs7954061	chr12:39022277	A vs. G	All (C only)	4	4666	1.09 (0.97-1.22)	0.158	-	-	-	-	-	-	-	-
LRRK2	rs7957151	chr12:39022310	T vs. A	All (C only)	4	4666	1.08 (0.96-1.22)	0.177	-	-	-	-	-	-	-	-
LRRK2	rs4768232	chr12:39023507	C vs. T	All (C only)	4	3852	1.08 (0.95-1.22)	0.272	-	-	-	-	-	-	-	-
LRRK2	rs2162471	chr12:39024099	C vs. T	All (C only)	5	5673	0.89 (0.81-0.98)	0.0151	A	2184	A	4	C	Low OR	C	<1
LRRK2	rs1035813	chr12:39024175	C vs. T	All (C only)	5	5310	1.08 (0.97-1.21)	0.156	-	-	-	-	-	-	-	-
LRRK2	rs11564147	chr12:39025760	A vs. G	All (C only)	6	5730	1.03 (0.88-1.21)	0.703	-	-	-	-	-	-	-	-
LRRK2	rs10878405	chr12:39028521	A vs. G	All (C, A, D, O)	11	8249	1.07 (1.00-1.15)	0.0462	A	5219	A	0	C	Low OR	C	<1
LRRK2	rs10878405	chr12:39028521	A vs. G	C	7	6388	1.08 (1.00-1.16)	0.05	-	-	-	-	-	-	-	-
LRRK2	rs4768235	chr12:39030353	A vs. T	All (C only)	5	4353	1.02 (0.90-1.15)	0.772	-	-	-	-	-	-	-	-
LRRK2	rs7303525	chr12:39031042	G vs. T	All (C only)	4	7610	0.95 (0.87-1.04)	0.296	-	-	-	-	-	-	-	-
LRRK2	rs7132187	chr12:39031075	A vs. G	All (C only)	6	5701	0.93 (0.86-1.00)	0.0649	-	-	-	-	-	-	-	-
LRRK2	rs7307310	chr12:39031448	T vs. C	All (C only)	5	8176	1.00 (0.91-1.11)	0.942	-	-	-	-	-	-	-	-
LRRK2	rs11176154	chr12:39032169	C vs. G	All (C only)	4	4604	0.88 (0.80-0.97)	0.0101	A	2362	A	0	C	Low OR	C	<1
LRRK2	rs890575	chr12:39034662	G vs. A	All (C only)	6	5366	1.05 (0.94-1.17)	0.39	-	-	-	-	-	-	-	-
LRRK2	rs3789330	chr12:39039570	A vs. G	All (C only)	4	4635	1.07 (0.94-1.21)	0.309	-	-	-	-	-	-	-	-
LRRK2	rs34778348	chr12:39043595	A vs. G	A	13	10441	2.23 (1.89-2.63)	2.97e-21	B	750	n.a.	0	n.a.	-	B	15.2
LRRK2	rs34778348	chr12:39043595	A vs. G	All (C, A, O)	15	11386	2.11 (1.61-2.75)	4.79e-08	B	932	n.a.	58	n.a.	-	B	3.6
LRRK2	rs33962975	chr12:39043597	G vs. A	All (C, A, D, O)	6	5142	1.01 (0.89-1.14)	0.868	-	-	-	-	-	-	-	-
LRRK2	rs33962975	chr12:39043597	G vs. A	C	3	4005	0.99 (0.87-1.13)	0.896	-	-	-	-	-	-	-	-
LRRK2	rs11835105	chr12:39044312	G vs. T	All (C only)	4	8685	1.05 (0.97-1.13)	0.275	-	-	-	-	-	-	-	-
LRRK2	rs3761863	chr12:39044919	T vs. C	C	6	5835	0.94 (0.87-1.01)	0.102	-	-	-	-	-	-	-	-
LRRK2	rs3761863	chr12:39044919	T vs. C	All (C, A, D, O)	9	6972	0.96 (0.90-1.03)	0.284	-	-	-	-	-	-	-	-
MUC19	rs1019709	chr12:39088417	G vs. A	All (C only)	4	4732	0.92 (0.84-1.00)	0.041	A	4027	A	0	C	Low OR	C	<1
TMPRSS12	rs12831858	chr12:49545464	G vs. A	All (C only)	4	17962	0.97 (0.87-1.08)	0.576	-	-	-	-	-	-	-	-
METTL7A	rs764606	chr12:49599798	A vs. G	All (C only)	4	17993	0.97 (0.87-1.09)	0.593	-	-	-	-	-	-	-	-
KCNA5	rs17776352*	chr12:5007774	C vs. A	All (C only)	10	59718	0.93 (0.86-1.02)	0.114	-	-	-	-	-	-	-	-
KCNA5	rs10744675*	chr12:5015383	G vs. A	All (C only)	11	60123	0.94 (0.87-1.01)	0.0822	-	-	-	-	-	-	-	-
KCNA5	rs2016141	chr12:5016264	G vs. A	All (C only)	5	13571	0.90 (0.78-1.05)	0.176	-	-	-	-	-	-	-	-
LRP1	rs1799986	chr12:55821533	T vs. C	All (C, A)	4	7523	0.95 (0.86-1.06)	0.368	-	-	-	-	-	-	-	-
LRP1	rs1799986	chr12:55821533	T vs. C	C	3	7150	0.96 (0.86-1.06)	0.402	-	-	-	-	-	-	-	-
IFNG	rs2069718	chr12:66836429	T vs. C	All (C, A)	4	7801	0.97 (0.89-1.05)	0.388	-	-	-	-	-	-	-	-
IFNG	rs2069718	chr12:66836429	T vs. C	C	3	7421	0.98 (0.88-1.08)	0.631	-	-	-	-	-	-	-	-
WNK1	rs11064524	chr12:760163	G vs. T	All (C only)	5	19786	1.07 (0.96-1.19)	0.203	-	-	-	-	-	-	-	-
GWA_12q21.31	rs7954761	chr12:82691472	C vs. A	All (C only)	4	10578	0.93 (0.78-1.10)	0.396	-	-	-	-	-	-	-	-
A2M	rs669	chr12:9123535	G vs. A	All (C, A, O)	7	5043	1.08 (0.97-1.20)	0.171	-	-	-	-	-	-	-	-
A2M	rs669	chr12:9123535	G vs. A	C	4	4055	1.06 (0.96-1.16)	0.261	-	-	-	-	-	-	-	-
PLXNC1	rs2068435	chr12:93185105	C vs. T	All (C, A)	6	4852	0.92 (0.77-1.10)	0.344	-	-	-	-	-	-	-	-
PLXNC1	rs2068435	chr12:93185105	C vs. T	C	5	4135	0.93 (0.75-1.15)	0.487	-	-	-	-	-	-	-	-
MTIF3	rs7669	chr13:26907851	T vs. C	All (C only)	8	7137	0.95 (0.86-1.06)	0.353	-	-	-	-	-	-	-	-
SPRY2/GWA_13q31.1	rs9544996	chr13:78590677	A vs. G	All (C only)	4	14374	0.96 (0.85-1.09)	0.53	-	-	-	-	-	-	-	-
SPRY2/GWA_13q31.1	rs7988352	chr13:79555356	C vs. A	All (C only)	4	10236	1.05 (0.94-1.16)	0.419	-	-	-	-	-	-	-	-
SPRY2/GWA_13q31.1	rs8001641*	chr13:79590812	G vs. A	All (C only)	11	59617	1.01 (0.98-1.04)	0.694	-	-	-	-	-	-	-	-
SPRY2/GWA_13q31.1	rs1215470	chr13:79604456	G vs. A	All (C only)	4	10231	0.95 (0.81-1.11)	0.499	-	-	-	-	-	-	-	-
SPRY2/GWA_13q31.1	rs1215451	chr13:79613894	A vs. G	All (C only)	4	10177	0.95 (0.80-1.13)	0.557	-	-	-	-	-	-	-	-
SPRY2/GWA_13q31.1	rs679805	chr13:79645702	G vs. A	All (C only)	4	10225	1.05 (0.97-1.14)	0.212	-	-	-	-	-	-	-	-
SPRY2/GWA_13q31.1	rs504122	chr13:79809526	A vs. G	All (C only)	4	10204	0.92 (0.82-1.02)	0.119	-	-	-	-	-	-	-	-
FARP1	rs2282048*	chr13:97695153	G vs. A	All (C, A)	19	32645	0.96 (0.92-1.00)	0.0362	A	25682	B	27	C	Low OR, F, HWE, Regr	C	<1
FARP1	rs2282048*	chr13:97695153	G vs. A	C	18	32247	0.96 (0.92-1.00)	0.0575	-	-	-	-	-	-	-	-
KLC1	rs4900590	chr14:103216174	T vs. C	All (C only)	4	3924	1.01 (0.90-1.14)	0.824	-	-	-	-	-	-	-	-
GWA_14q22.2	rs2150279	chr14:53343338	C vs. T	All (C only)	4	15157	1.05 (0.96-1.15)	0.301	-	-	-	-	-	-	-	-
GCH1	rs841*	chr14:54380242	T vs. C	All (C only)	11	27528	0.94 (0.88-1.00)	0.046	A	11115	B	37	C	Low OR	C	<1
GCH1	rs4411417*	chr14:54390313	C vs. T	All (C only)	12	60223	0.93 (0.89-0.98)	0.00746	A	23904	B	31	C	Low OR	C	<1
GCH1	rs3783637*	chr14:54417868	T vs. C	All (C, A)	12	60743	0.93 (0.89-0.98)	0.00648	A	13499	A	5	C	Low OR	C	<1
GCH1	rs3783637*	chr14:54417868	T vs. C	C	11	60362	0.93 (0.88-0.98)	0.0104	A	13305	A	13	C	Low OR	C	<1
GCH1	rs8004018*	chr14:54420446	G vs. A	All (C only)	11	27278	0.93 (0.87-0.99)	0.0282	A	6372	A	15	C	Low OR	C	<1
GCH1	rs8017210	chr14:54431586	A vs. G	All (C only)	4	3824	0.91 (0.81-1.03)	0.122	-	-	-	-	-	-	-	-
OTX2	rs709947	chr14:56339908	G vs. C	All (C only)	4	4468	0.96 (0.87-1.05)	0.347	-	-	-	-	-	-	-	-
ESR2	rs1152579	chr14:63764840	A vs. G	All (C only)	4	4415	1.00 (0.92-1.10)	0.924	-	-	-	-	-	-	-	-
ESR2	rs1256049	chr14:63793804	A vs. G	All (C only)	5	4826	0.95 (0.75-1.21)	0.667	-	-	-	-	-	-	-	-
MTHFD1	rs2236225	chr14:63978598	A vs. G	All (C only)	4	7676	0.99 (0.92-1.06)	0.738	-	-	-	-	-	-	-	-
DLST	rs1799900	chr14:74437493	G vs. A	All (C, A)	5	4561	0.97 (0.89-1.06)	0.467	-	-	-	-	-	-	-	-
DLST	rs1799900	chr14:74437493	G vs. A	C	4	4295	0.97 (0.89-1.06)	0.542	-	-	-	-	-	-	-	-
DLST	rs20578	chr14:74437560	T vs. C	All (C, A)	4	3723	1.07 (0.97-1.19)	0.158	-	-	-	-	-	-	-	-
SERPINA3	rs4934	chr14:94150556	G vs. A	C	4	7260	1.02 (0.95-1.09)	0.652	-	-	-	-	-	-	-	-
SERPINA3	rs4934	chr14:94150556	G vs. A	A	5	1488	1.05 (0.84-1.31)	0.689	-	-	-	-	-	-	-	-
SERPINA3	rs4934	chr14:94150556	G vs. A	All (C, A)	9	8748	1.01 (0.91-1.11)	0.922	-	-	-	-	-	-	-	-
GWA_15q11.2	rs11161360	chr15:21706523	A vs. G	All (C only)	4	17153	1.04 (0.94-1.14)	0.486	-	-	-	-	-	-	-	-
GWA_15q11.2	rs12899677	chr15:21709419	A vs. G	All (C only)	4	15987	1.05 (0.94-1.17)	0.402	-	-	-	-	-	-	-	-
CHP	rs6492998	chr15:39333923	G vs. A	C	4	7954	1.06 (0.96-1.17)	0.289	-	-	-	-	-	-	-	-
CHP	rs6492998	chr15:39333923	G vs. A	All (C, A)	5	8671	1.02 (0.90-1.16)	0.725	-	-	-	-	-	-	-	-
ADAL/TUBGCP4	rs9920879	chr15:41427062	G vs. A	All (C only)	4	18294	1.01 (0.88-1.15)	0.911	-	-	-	-	-	-	-	-
ADAL/TUBGCP4	rs6493084*	chr15:41434919	G vs. A	All (C only)	11	59454	1.05 (0.99-1.12)	0.128	-	-	-	-	-	-	-	-
ADAL/TUBGCP4	rs3809482	chr15:41449094	G vs. A	All (C only)	4	10189	1.13 (0.97-1.32)	0.107	-	-	-	-	-	-	-	-
MAP1A/TP53BP1	rs2602141*	chr15:41511938	C vs. A	All (C only)	11	59509	1.05 (0.98-1.11)	0.163	-	-	-	-	-	-	-	-
PPIP5K1	rs689797	chr15:41613849	A vs. G	All (C only)	4	10215	1.13 (0.96-1.33)	0.13	-	-	-	-	-	-	-	-
PPIP5K1	rs2255663	chr15:41616300	A vs. G	All (C only)	4	10173	1.13 (0.96-1.34)	0.135	-	-	-	-	-	-	-	-
FRMD5	rs524908	chr15:41975283	C vs. A	All (C only)	4	10148	1.11 (0.92-1.34)	0.276	-	-	-	-	-	-	-	-
B2M	rs7151*	chr15:42797304	C vs. G	All (C, A)	10	27563	0.91 (0.80-1.02)	0.0992	-	-	-	-	-	-	-	-
B2M	rs7151*	chr15:42797304	C vs. G	C	8	24305	0.92 (0.81-1.05)	0.209	-	-	-	-	-	-	-	-
SEMA6D	rs16959883	chr15:45698555	T vs. C	All (C only)	4	14565	1.00 (0.86-1.16)	0.996	-	-	-	-	-	-	-	-
CYP19A1	rs10046	chr15:49290278	T vs. C	C	3	3661	1.01 (0.92-1.11)	0.914	-	-	-	-	-	-	-	-
CYP19A1	rs10046	chr15:49290278	T vs. C	All (C, A)	4	4041	1.00 (0.92-1.09)	0.991	-	-	-	-	-	-	-	-
TCF12	rs7176873	chr15:55136454	A vs. G	All (C only)	4	15233	1.08 (0.92-1.26)	0.372	-	-	-	-	-	-	-	-
TCF12	rs16977243	chr15:55181297	C vs. A	All (C only)	4	14681	1.06 (0.88-1.27)	0.56	-	-	-	-	-	-	-	-
TCF12	rs2733333	chr15:55223218	A vs. G	All (C only)	4	18524	1.07 (0.91-1.26)	0.4	-	-	-	-	-	-	-	-
TCF12	rs7164298	chr15:55370593	G vs. A	All (C only)	4	14498	1.05 (0.90-1.22)	0.517	-	-	-	-	-	-	-	-
C15orf60	rs1481088*	chr15:71629314	A vs. G	All (C only)	11	59203	1.02 (0.96-1.07)	0.545	-	-	-	-	-	-	-	-
CYP1A1	rs4646903	chr15:72798694	C vs. T	C	3	3433	0.89 (0.76-1.05)	0.16	-	-	-	-	-	-	-	-
CYP1A1	rs4646903	chr15:72798694	C vs. T	All (C, A)	4	3735	1.02 (0.78-1.33)	0.872	-	-	-	-	-	-	-	-
CYP1A1	rs1048943	chr15:72800038	G vs. A	C	4	3356	0.83 (0.64-1.09)	0.184	-	-	-	-	-	-	-	-
CYP1A1	rs1048943	chr15:72800038	G vs. A	All (C, A)	6	4072	1.05 (0.74-1.48)	0.806	-	-	-	-	-	-	-	-
CYP1A2	rs762551	chr15:72828970	C vs. A	All (C, A, D, H)	10	8707	1.06 (0.97-1.15)	0.228	-	-	-	-	-	-	-	-
CYP1A2	rs762551	chr15:72828970	C vs. A	C	6	7075	1.01 (0.93-1.10)	0.816	-	-	-	-	-	-	-	-
CYP1A2	rs2472304	chr15:72831291	G vs. A	C	4	9795	0.96 (0.90-1.03)	0.239	-	-	-	-	-	-	-	-
CYP1A2	rs2472304	chr15:72831291	G vs. A	All (C, A, D, H)	7	10541	0.99 (0.90-1.08)	0.787	-	-	-	-	-	-	-	-
CYP1A2	rs2470890	chr15:72834479	C vs. T	C	3	5378	0.95 (0.88-1.03)	0.242	-	-	-	-	-	-	-	-
CYP1A2	rs2470890	chr15:72834479	C vs. T	All (C, A, D, H)	6	6122	1.01 (0.90-1.13)	0.905	-	-	-	-	-	-	-	-
LINGO1	rs4886887	chr15:75685258	A vs. G	All (C only)	4	4759	0.99 (0.90-1.09)	0.763	-	-	-	-	-	-	-	-
LINGO1	rs9652490	chr15:75750942	G vs. A	A	4	2659	0.98 (0.85-1.12)	0.742	-	-	-	-	-	-	-	-
LINGO1	rs9652490	chr15:75750942	G vs. A	All (C, A)	12	15257	1.00 (0.94-1.06)	0.881	-	-	-	-	-	-	-	-
LINGO1	rs9652490	chr15:75750942	G vs. A	C	8	12598	1.00 (0.94-1.07)	0.996	-	-	-	-	-	-	-	-
LINGO1	rs11856808	chr15:75759825	T vs. C	C	4	9510	1.04 (0.97-1.11)	0.246	-	-	-	-	-	-	-	-
LINGO1	rs11856808	chr15:75759825	T vs. C	All (C, A)	5	10320	1.02 (0.95-1.09)	0.646	-	-	-	-	-	-	-	-
IREB2	rs954144	chr15:76517646	T vs. C	All (C only)	4	3487	0.97 (0.85-1.12)	0.705	-	-	-	-	-	-	-	-
IREB2	rs3817092	chr15:76551340	G vs. A	All (C only)	4	3643	1.02 (0.88-1.17)	0.82	-	-	-	-	-	-	-	-
IREB2	rs8036042	chr15:76551379	A vs. G	All (C only)	4	3627	1.01 (0.87-1.17)	0.875	-	-	-	-	-	-	-	-
IREB2	rs2292116	chr15:76576731	C vs. T	All (C only)	4	3646	1.01 (0.84-1.20)	0.934	-	-	-	-	-	-	-	-
AGPHD1	rs8034191	chr15:76593078	C vs. T	All (C only)	4	9262	1.00 (0.90-1.10)	0.965	-	-	-	-	-	-	-	-
FAH	rs1865997*	chr15:78278508	G vs. A	All (C, A)	20	65141	0.95 (0.91-0.99)	0.02	A	52780	B	39	C	Low OR, F, Regr	C	<1
FAH	rs1865997*	chr15:78278508	G vs. A	C	19	64748	0.95 (0.91-1.00)	0.0305	A	52470	B	39	C	Low OR, F, Regr	C	<1
LRRK1	rs4965778	chr15:99409446	G vs. A	C	3	3634	1.07 (0.97-1.18)	0.168	-	-	-	-	-	-	-	-
LRRK1	rs4965778	chr15:99409446	G vs. A	All (C, O)	4	4144	0.99 (0.84-1.17)	0.892	-	-	-	-	-	-	-	-
LRRK1	rs11853661	chr15:99415837	T vs. C	C	3	3774	0.96 (0.87-1.05)	0.325	-	-	-	-	-	-	-	-
LRRK1	rs11853661	chr15:99415837	T vs. C	All (C, O)	4	4284	1.01 (0.88-1.17)	0.856	-	-	-	-	-	-	-	-
ABCA3	rs2014467*	chr16:2276395	G vs. A	All (C only)	11	104168	0.94 (0.89-0.98)	0.00482	A	45470	B	38	C	Low OR	C	<1
ABCA3	rs17183533*	chr16:2285389	G vs. A	All (C only)	11	113309	0.94 (0.90-0.98)	0.00539	A	47288	B	37	C	Low OR	C	<1
RBFOX1	rs7202526	chr16:6808380	A vs. G	All (C only)	4	16464	1.05 (0.93-1.18)	0.422	-	-	-	-	-	-	-	-
RBFOX1	rs8049001	chr16:6814469	G vs. A	All (C only)	4	16515	1.04 (0.94-1.16)	0.449	-	-	-	-	-	-	-	-
NQO1	rs1800566	chr16:68302646	T vs. C	C	5	10377	0.97 (0.90-1.05)	0.478	-	-	-	-	-	-	-	-
NQO1	rs1800566	chr16:68302646	T vs. C	All (C, A)	8	11365	0.98 (0.91-1.05)	0.575	-	-	-	-	-	-	-	-
NQO1	rs1800566	chr16:68302646	T vs. C	A	3	988	1.01 (0.82-1.25)	0.918	-	-	-	-	-	-	-	-
AK095618	rs212175	chr16:71084748	G vs. A	All (C only)	4	16716	0.94 (0.83-1.06)	0.332	-	-	-	-	-	-	-	-
NOS2	rs1060826	chr17:23113994	A vs. G	All (C only)	6	5606	1.03 (0.95-1.12)	0.45	-	-	-	-	-	-	-	-
NOS2	rs4796052	chr17:23127161	T vs. C	All (C only)	4	4507	0.92 (0.82-1.02)	0.111	-	-	-	-	-	-	-	-
SLC6A4	rs4795541	chr17:25588485	short vs. long	C	3	1233	1.17 (0.87-1.56)	0.3	-	-	-	-	-	-	-	-
SLC6A4	rs4795541	chr17:25588485	short vs. long	All (C, A, O)	5	2421	1.07 (0.86-1.32)	0.552	-	-	-	-	-	-	-	-
CCL2	rs1024611	chr17:29603901	G vs. A	All (C, A)	5	8364	1.07 (0.94-1.20)	0.311	-	-	-	-	-	-	-	-
CCL2	rs1024611	chr17:29603901	G vs. A	C	4	7855	1.08 (0.93-1.26)	0.321	-	-	-	-	-	-	-	-
ACACA	rs1900101	chr17:32529390	C vs. A	All (C, A)	4	3904	0.92 (0.82-1.04)	0.17	-	-	-	-	-	-	-	-
ACACA	rs1900101	chr17:32529390	C vs. A	C	3	3524	0.91 (0.80-1.04)	0.173	-	-	-	-	-	-	-	-
ACACA	rs2229416	chr17:32683979	A vs. G	All (C, A)	4	3859	1.07 (0.94-1.22)	0.284	-	-	-	-	-	-	-	-
ACACA	rs2229416	chr17:32683979	A vs. G	C	3	3478	1.08 (0.93-1.24)	0.319	-	-	-	-	-	-	-	-
ACACA	rs2254914*	chr17:32714088	C vs. T	All (C, A)	11	57679	0.96 (0.92-1.00)	0.0544	-	-	-	-	-	-	-	-
ACACA	rs2254914*	chr17:32714088	C vs. T	C	10	57300	0.96 (0.92-1.00)	0.0655	-	-	-	-	-	-	-	-
GRN	rs5848	chr17:39785770	T vs. C	All (C only)	5	4724	1.05 (0.96-1.15)	0.315	-	-	-	-	-	-	-	-
PLEKHM1	rs11012	chr17:40869224	A vs. G	All (C only)	5	22213	0.79 (0.75-0.85)	9.36e-13	A	14039	n.a.	26	n.a.	-	A	9.7
CRHR1	rs241041	chr17:41069708	C vs. T	All (C only)	4	7071	0.78 (0.71-0.84)	2.06e-09	A	3254	n.a.	0	n.a.	-	A	6.5
CRHR1	rs241039	chr17:41070456	T vs. A	All (C only)	4	7054	0.78 (0.71-0.84)	2.23e-09	A	3247	n.a.	0	n.a.	-	A	6.4
MAPT/STH	rs2942168*	chr17:41070633	T vs. C	All (C only)	25	45647	0.78 (0.75-0.80)	2.27e-46	A	18134	n.a.	0	n.a.	-	A	42.7
MAPT/STH	rs393152	chr17:41074926	G vs. A	All (C only)	6	20492	0.77 (0.73-0.81)	2.4e-22	A	14697	n.a.	0	n.a.	-	A	19
CRHR1	rs417968	chr17:41084159	G vs. A	C	5	24190	0.80 (0.76-0.84)	8.21e-22	A	17171	n.a.	0	n.a.	-	A	18.5
CRHR1	rs417968	chr17:41084159	G vs. A	All (C, A)	8	44488	0.85 (0.78-0.92)	4.5e-05	A	21613	C	65	A	-	C	2.5
CRHR1	rs417968	chr17:41084159	G vs. A	A	3	20298	1.02 (0.89-1.17)	0.764	-	-	-	-	-	-	-	-
MAPT/STH	rs7215239	chr17:41123556	G vs. A	All (C only)	5	19595	0.80 (0.76-0.85)	7.7e-17	A	14581	n.a.	0	n.a.	-	A	13.6
CRHR1	rs1526123	chr17:41139123	G vs. A	All (C only)	4	17517	0.88 (0.84-0.92)	2.4e-08	A	16651	n.a.	0	n.a.	Low OR	A	5.5
CRHR1	rs17334797	chr17:41181683	G vs. A	All (C only)	4	6948	0.77 (0.71-0.84)	1.56e-09	A	3249	n.a.	0	n.a.	-	A	6.6
CRHR1	rs17426064	chr17:41184469	T vs. C	All (C only)	4	6971	0.77 (0.71-0.84)	1.6e-09	A	3254	n.a.	0	n.a.	-	A	6.6
CRHR1	rs12150390	chr17:41252009	C vs. T	All (C only)	4	6910	0.78 (0.72-0.85)	9.74e-09	A	3146	n.a.	0	n.a.	-	A	5.8
CRHR1	rs1912151	chr17:41258725	A vs. G	All (C only)	4	6980	0.78 (0.72-0.85)	7.16e-09	A	3211	n.a.	0	n.a.	-	A	6
CRHR1	rs1396862	chr17:41258778	T vs. C	All (C only)	4	7015	0.78 (0.72-0.85)	7.98e-09	A	3221	n.a.	1	n.a.	-	A	5.9
CRHR1	rs17763086	chr17:41261262	G vs. T	All (C only)	4	7004	0.78 (0.72-0.85)	8.52e-09	A	3216	n.a.	1	n.a.	-	A	5.9
CRHR1	rs16940665	chr17:41263677	C vs. T	All (C only)	4	6873	0.78 (0.72-0.85)	1.38e-08	A	3167	n.a.	1	n.a.	-	A	5.7
CRHR1	rs1876828	chr17:41267306	A vs. G	All (C only)	4	6977	0.78 (0.72-0.85)	6.89e-09	A	3209	n.a.	0	n.a.	-	A	6
CRHR1	rs878886	chr17:41268271	G vs. C	All (C only)	4	6978	0.78 (0.72-0.85)	6.82e-09	A	3209	n.a.	0	n.a.	-	A	6
CRHR1	rs878887	chr17:41268363	T vs. C	All (C only)	4	6911	0.78 (0.71-0.85)	8.18e-09	A	3144	n.a.	0	n.a.	-	A	5.9
CRHR1	rs878888	chr17:41268416	G vs. A	All (C only)	4	6993	0.78 (0.72-0.85)	6.38e-09	A	3214	n.a.	0	n.a.	-	A	6
CRHR1	rs4525537	chr17:41268504	C vs. T	All (C only)	4	7009	0.78 (0.72-0.85)	5.94e-09	A	3220	n.a.	0	n.a.	-	A	6
CRHR1	rs4640231	chr17:41268567	C vs. G	All (C only)	4	7016	0.78 (0.72-0.85)	5.75e-09	A	3223	n.a.	0	n.a.	-	A	6.1
CRHR1	rs10445364	chr17:41272136	A vs. G	All (C only)	4	6974	0.78 (0.72-0.85)	6.36e-09	A	3194	n.a.	0	n.a.	-	A	6
IMP5	rs17763596	chr17:41276990	T vs. G	All (C only)	4	7017	0.78 (0.71-0.85)	9.12e-09	A	3219	n.a.	2	n.a.	-	A	5.8
IMP5	rs12185233	chr17:41279434	C vs. G	All (C only)	4	7023	0.78 (0.72-0.85)	5.6e-09	A	3219	n.a.	0	n.a.	-	A	6.1
IMP5	rs12185268	chr17:41279463	G vs. A	All (C only)	7	22814	0.77 (0.73-0.81)	5.53e-25	A	15997	n.a.	0	n.a.	-	A	21.5
IMP5	rs12185235	chr17:41279483	T vs. C	All (C only)	4	7061	0.78 (0.72-0.85)	1.56e-08	A	3237	n.a.	4	n.a.	-	A	5.7
IMP5	rs12373123	chr17:41279853	C vs. T	All (C only)	4	7087	0.78 (0.72-0.85)	5.23e-09	A	3240	n.a.	1	n.a.	-	A	6.1
IMP5	rs12373139	chr17:41279910	A vs. G	All (C only)	7	27442	0.78 (0.74-0.81)	8.25e-27	A	17739	n.a.	0	n.a.	-	A	23.3
IMP5	rs12373142	chr17:41279980	G vs. C	All (C only)	4	7076	0.78 (0.72-0.85)	4.54e-09	A	3239	n.a.	0	n.a.	-	A	6.1
LOC100128977	rs17690703	chr17:41281077	T vs. C	C	4	17321	0.79 (0.75-0.83)	1.48e-18	A	13576	n.a.	0	n.a.	-	A	15.3
LOC100128977	rs17690703	chr17:41281077	T vs. C	All (C, A)	7	37400	0.81 (0.75-0.88)	5.15e-07	A	15576	B	48	A	-	B	4.3
LOC100128977	rs17690703	chr17:41281077	T vs. C	A	3	20078	0.97 (0.78-1.20)	0.761	-	-	-	-	-	-	-	-
MAPT/STH	rs17770343	chr17:41325948	C vs. T	All (C only)	4	7543	0.79 (0.73-0.86)	5.91e-08	A	3130	n.a.	6	n.a.	-	A	5.1
MAPT/STH	rs17691610	chr17:41326456	T vs. G	All (C only)	4	7570	0.79 (0.73-0.86)	4.72e-08	A	3137	n.a.	6	n.a.	-	A	5.2
MAPT/STH	rs1467967	chr17:41342006	C vs. T	All (C, A, O)	9	7340	1.06 (0.99-1.14)	0.0873	-	-	-	-	-	-	-	-
MAPT/STH	rs1467967	chr17:41342006	C vs. T	C	7	6428	1.06 (0.98-1.14)	0.161	-	-	-	-	-	-	-	-
MAPT/STH	rs17563986	chr17:41347100	C vs. T	All (C only)	6	20285	0.78 (0.74-0.82)	3.81e-21	A	14527	n.a.	0	n.a.	-	A	17.8
MAPT/STH	rs3785880	chr17:41349204	G vs. T	C	4	10793	1.10 (1.04-1.17)	0.002	A	10720	A	3	C	Low OR	C	1
MAPT/STH	rs3785880	chr17:41349204	G vs. T	All (C, D)	5	10973	1.10 (1.02-1.18)	0.0141	A	10967	A	24	C	Low OR	C	<1
MAPT/STH	rs242556	chr17:41358078	A vs. T	All (C, D)	4	3806	1.13 (0.95-1.34)	0.167	-	-	-	-	-	-	-	-
MAPT/STH	rs242556	chr17:41358078	A vs. T	C	3	3620	1.07 (0.97-1.19)	0.188	-	-	-	-	-	-	-	-
MAPT/STH	rs2435205	chr17:41374593	G vs. A	All (C only)	4	10688	1.05 (0.99-1.12)	0.0934	-	-	-	-	-	-	-	-
MAPT/STH	rs242557	chr17:41375573	A vs. G	C	20	14798	1.06 (1.01-1.11)	0.0206	A	11086	A	0	C	Low OR	C	<1
MAPT/STH	rs242557	chr17:41375573	A vs. G	All (C, A, D, O)	26	36082	1.03 (0.99-1.07)	0.144	-	-	-	-	-	-	-	-
MAPT/STH	rs242557	chr17:41375573	A vs. G	A	4	20538	0.97 (0.89-1.06)	0.474	-	-	-	-	-	-	-	-
MAPT/STH	rs242562	chr17:41382599	A vs. G	All (C, A)	7	10448	1.04 (0.96-1.13)	0.381	-	-	-	-	-	-	-	-
MAPT/STH	rs242562	chr17:41382599	A vs. G	C	6	10068	1.03 (0.94-1.12)	0.562	-	-	-	-	-	-	-	-
MAPT/STH	rs17650901	chr17:41395527	G vs. A	All (C only)	5	7857	0.79 (0.73-0.86)	7.85e-09	A	3285	n.a.	0	n.a.	-	A	5.9
MAPT/STH	rs1800547	chr17:41407682	G vs. A	All (C only)	5	9342	0.78 (0.73-0.84)	9.59e-12	A	4517	n.a.	0	n.a.	-	A	8.7
MAPT/STH	rs3785883	chr17:41410269	A vs. G	All (C, A)	10	14908	1.04 (0.95-1.13)	0.37	-	-	-	-	-	-	-	-
MAPT/STH	rs3785883	chr17:41410269	A vs. G	C	9	14530	1.04 (0.94-1.14)	0.464	-	-	-	-	-	-	-	-
MAPT/STH	rs754593	chr17:41410532	G vs. A	All (C only)	4	3998	0.92 (0.82-1.04)	0.196	-	-	-	-	-	-	-	-
MAPT/STH	rs1981997	chr17:41412603	A vs. G	All (C only)	6	20847	0.78 (0.74-0.82)	8.03e-21	A	8953	n.a.	0	n.a.	-	A	17.5
MAPT/STH	rs2435207	chr17:41414765	A vs. G	All (C only)	4	6822	1.06 (0.99-1.14)	0.103	-	-	-	-	-	-	-	-
MAPT/STH	rs17651549	chr17:41417115	T vs. C	All (C only)	4	7479	0.79 (0.72-0.86)	3.54e-08	A	3087	n.a.	9	n.a.	-	A	5.3
MAPT/STH	rs2435211	chr17:41419081	T vs. C	All (C only)	4	10756	1.10 (1.03-1.17)	0.00449	A	10618	A	0	C	Low OR	C	<1
MAPT/STH	rs10445337	chr17:41423237	C vs. T	All (C only)	4	7058	0.78 (0.72-0.85)	1.35e-08	A	3235	n.a.	3	n.a.	-	A	5.7
MAPT/STH	rs10445338	chr17:41423519	A vs. G	All (C only)	4	7026	0.78 (0.72-0.85)	1.49e-08	A	3223	n.a.	3	n.a.	-	A	5.7
MAPT/STH	rs1052551	chr17:41424761	A vs. G	All (C only)	4	7440	0.79 (0.72-0.86)	5.79e-08	A	3075	n.a.	10	n.a.	-	A	5.1
MAPT/STH	rs17573175	chr17:41426926	G vs. C	All (C only)	4	7047	0.78 (0.72-0.85)	8.16e-09	A	3228	n.a.	1	n.a.	-	A	5.9
MAPT/STH	238bp-indel	chr17:41428652-41428889	Del vs. Ins	C	9	4251	0.74 (0.62-0.88)	0.000907	A	1657	C	55	A	-	C	1.3
MAPT/STH	238bp-indel	chr17:41428652-41428889	Del vs. Ins	All (C, D, O)	11	4967	0.78 (0.65-0.94)	0.00766	A	1715	C	57	C	HWE	C	<1
MAPT/STH	rs1052553	chr17:41429726	G vs. A	All (C only)	20	17116	0.79 (0.75-0.84)	1.05e-15	A	6780	n.a.	3	n.a.	-	A	12.5
MAPT/STH	rs17652121	chr17:41429810	C vs. T	All (C only)	4	7406	0.78 (0.72-0.85)	2.17e-08	A	3063	n.a.	7	n.a.	-	A	5.5
MAPT/STH	rs1078268	chr17:41431738	C vs. T	All (C only)	4	7046	0.78 (0.72-0.85)	8.5e-09	A	3232	n.a.	1	n.a.	-	A	5.9
MAPT/STH	rs2471738	chr17:41431900	A vs. G	All (C, A, O)	11	11616	1.01 (0.92-1.10)	0.872	-	-	-	-	-	-	-	-
MAPT/STH	rs2471738	chr17:41431900	A vs. G	C	9	10700	1.01 (0.91-1.11)	0.912	-	-	-	-	-	-	-	-
MAPT/STH	rs62063857	chr17:41432502	G vs. A	C	11	7707	0.75 (0.69-0.81)	2.11e-12	A	3449	n.a.	0	n.a.	-	A	9.2
MAPT/STH	rs62063857	chr17:41432502	G vs. A	All (C, O)	12	8073	0.75 (0.69-0.82)	7.48e-11	A	3537	n.a.	6	n.a.	-	A	7.8
MAPT/STH	rs8070723	chr17:41436901	G vs. A	All (C only)	5	19906	0.78 (0.74-0.82)	5.01e-20	A	14079	n.a.	0	n.a.	-	A	16.7
MAPT/STH	rs9468	chr17:41457408	C vs. T	All (C only)	5	7139	0.81 (0.75-0.89)	3.2e-06	A	3092	A	0	A	-	A	3.5
MAPT/STH	rs1052587	chr17:41458449	C vs. T	All (C only)	4	7458	0.78 (0.72-0.85)	2.62e-09	A	3089	n.a.	0	n.a.	-	A	6.4
MAPT/STH	rs17574228	chr17:41460355	C vs. T	All (C only)	4	7406	0.78 (0.72-0.85)	3.27e-09	A	3070	n.a.	0	n.a.	-	A	6.3
MAPT/STH	rs7521	chr17:41461242	A vs. G	C	8	7240	1.06 (0.99-1.14)	0.0906	-	-	-	-	-	-	-	-
MAPT/STH	rs7521	chr17:41461242	A vs. G	All (C, A, D, O)	11	8373	1.03 (0.96-1.11)	0.449	-	-	-	-	-	-	-	-
KIAA1267	rs17574361	chr17:41464049	G vs. A	All (C only)	4	7394	0.78 (0.72-0.85)	3.43e-09	A	3065	n.a.	0	n.a.	-	A	6.3
KIAA1267	rs17574604	chr17:41467460	G vs. A	All (C only)	4	7261	0.78 (0.72-0.85)	7e-09	A	3015	n.a.	0	n.a.	-	A	6
KIAA1267	rs7225002	chr17:41544850	G vs. A	C	4	17776	0.86 (0.81-0.90)	1.43e-09	A	13428	n.a.	12	n.a.	-	A	6.7
KIAA1267	rs7225002	chr17:41544850	G vs. A	All (C, A)	7	38019	0.91 (0.84-0.98)	0.0181	A	33694	C	75	C	Low OR	C	<1
KIAA1267	rs7225002	chr17:41544850	G vs. A	A	3	20242	1.01 (0.91-1.12)	0.873	-	-	-	-	-	-	-	-
KIAA1267	rs2532274	chr17:41602941	G vs. A	All (C only)	6	25906	0.80 (0.75-0.84)	3.89e-15	A	11064	n.a.	28	n.a.	Regr	A	12
KIAA1267	rs2532269	chr17:41605885	G vs. A	All (C only)	5	20044	0.78 (0.74-0.83)	7.89e-19	A	8389	n.a.	0	n.a.	-	A	15.5
KIAA1267	rs2668692	chr17:41648797	A vs. G	All (C only)	5	19441	0.78 (0.74-0.82)	8.88e-20	A	13980	n.a.	0	n.a.	-	A	16.5
MAPT/STH	H1H2	chr17:42131818-41149582	H2 vs. H1	C	37	50389	0.78 (0.75-0.80)	7.97e-52	A	20452	n.a.	0	n.a.	-	A	48.1
MAPT/STH	H1H2	chr17:42131818-41149582	H2 vs. H1	All (C, D, O)	41	51707	0.78 (0.75-0.81)	2.71e-49	A	20674	n.a.	1	n.a.	-	A	45.5
NSF	rs183211	chr17:42143493	A vs. G	C	4	15323	0.81 (0.77-0.86)	4.06e-12	A	7003	n.a.	0	n.a.	-	A	9.1
NSF	rs183211	chr17:42143493	A vs. G	All (C, A)	7	35541	0.88 (0.81-0.96)	0.00229	A	35327	C	61	C	Low OR	C	1
NSF	rs183211	chr17:42143493	A vs. G	A	3	20219	0.98 (0.90-1.06)	0.569	-	-	-	-	-	-	-	-
NSF	rs169201	chr17:42145386	G vs. A	All (C only)	4	14664	0.77 (0.73-0.82)	2e-15	A	11873	n.a.	0	n.a.	-	A	12.2
NSF	rs7224296	chr17:42155230	G vs. A	C	4	17788	0.85 (0.80-0.89)	1.45e-10	A	9386	n.a.	0	n.a.	-	A	7.6
NSF	rs7224296	chr17:42155230	G vs. A	All (C, A)	7	37994	0.90 (0.84-0.96)	0.000967	A	37701	C	52	C	Low OR	C	1.3
NSF	rs7224296	chr17:42155230	G vs. A	A	3	20206	0.99 (0.91-1.07)	0.755	-	-	-	-	-	-	-	-
MAPT/STH	rs199533	chr17:42184098	T vs. C	All (C only)	7	24515	0.77 (0.74-0.81)	8.85e-26	A	15720	n.a.	0	n.a.		A	22.3
MED13	rs4422036*	chr17:57490950	A vs. G	All (C only)	11	58753	1.08 (1.02-1.15)	0.00939	A	19535	B	41	C	Low OR	C	<1
MED13	rs8081812*	chr17:57536565	A vs. G	All (C only)	11	59001	1.07 (1.02-1.12)	0.00577	A	27372	B	31	C	Low OR	C	<1
MED13	rs4522464*	chr17:57553912	C vs. A	All (C only)	10	57987	1.10 (1.03-1.18)	0.00415	A	16077	B	46	C	Low OR	C	<1
ACE	rs1799752	chr17:58919622	ins vs. del	All (C, A, O)	4	1055	1.03 (0.77-1.39)	0.837	-	-	-	-	-	-	-	-
ABCA5	rs333917	chr17:64863054	G vs. A	All (C only)	4	13184	0.94 (0.84-1.06)	0.32	-	-	-	-	-	-	-	-
ABCA5	rs1662694	chr17:64869168	G vs. A	All (C only)	4	13100	0.95 (0.85-1.05)	0.311	-	-	-	-	-	-	-	-
STX8	rs2249915*	chr17:9349545	G vs. A	All (C, A)	12	58877	1.02 (0.98-1.07)	0.354	-	-	-	-	-	-	-	-
STX8	rs2249915*	chr17:9349545	G vs. A	C	11	58497	1.02 (0.98-1.06)	0.38	-	-	-	-	-	-	-	-
DCC	rs17468382	chr18:48515009	C vs. T	C	4	3700	0.90 (0.61-1.34)	0.61	-	-	-	-	-	-	-	-
DCC	rs17468382	chr18:48515009	C vs. T	All (C, A)	5	4403	1.04 (0.68-1.57)	0.869	-	-	-	-	-	-	-	-
BCL2	rs2051424*	chr18:59132023	A vs. C	C	10	58032	0.98 (0.95-1.01)	0.269	-	-	-	-	-	-	-	-
BCL2	rs2051424*	chr18:59132023	A vs. C	All (C, A)	11	58412	0.99 (0.96-1.02)	0.365	-	-	-	-	-	-	-	-
NDUFV2	rs4148965	chr18:9099484	T vs. G	All (C, A)	4	9269	1.04 (0.95-1.14)	0.403	-	-	-	-	-	-	-	-
NDUFV2	rs4148965	chr18:9099484	T vs. G	C	3	7529	1.00 (0.93-1.08)	0.966	-	-	-	-	-	-	-	-
NDUFV2	rs1039825	chr18:9104096	A vs. C	All (C, A)	4	5857	1.10 (0.92-1.32)	0.285	-	-	-	-	-	-	-	-
NDUFV2	rs906807	chr18:9107867	T vs. C	C	4	3953	0.95 (0.85-1.07)	0.381	-	-	-	-	-	-	-	-
NDUFV2	rs906807	chr18:9107867	T vs. C	A	3	1067	1.13 (0.81-1.58)	0.476	-	-	-	-	-	-	-	-
NDUFV2	rs906807	chr18:9107867	T vs. C	All (C, A)	7	5020	1.01 (0.89-1.14)	0.938	-	-	-	-	-	-	-	-
ICAM1	rs5498	chr19:10256683	G vs. A	All (C only)	4	3989	0.97 (0.89-1.07)	0.572	-	-	-	-	-	-	-	-
KEAP1	rs11085735*	chr19:10463180	T vs. G	All (C only)	11	57461	1.06 (1.00-1.13)	0.0596	-	-	-	-	-	-	-	-
CALR	rs1010222	chr19:12909608	A vs. G	All (C, A)	4	7930	1.06 (0.96-1.16)	0.249	-	-	-	-	-	-	-	-
CALR	rs1010222	chr19:12909608	A vs. G	C	3	7549	1.04 (0.96-1.14)	0.35	-	-	-	-	-	-	-	-
PAK4	rs17641276	chr19:44365874	G vs. A	C	4	3808	1.07 (0.94-1.22)	0.295	-	-	-	-	-	-	-	-
PAK4	rs17641276	chr19:44365874	G vs. A	All (C, A)	5	4516	1.05 (0.94-1.17)	0.378	-	-	-	-	-	-	-	-
APOE	rs429358	chr19:50103781	C vs. T	A	5	2125	1.19 (0.94-1.51)	0.146	-	-	-	-	-	-	-	-
APOE	rs429358	chr19:50103781	C vs. T	All (C, A H, O)	45	19582	1.04 (0.95-1.15)	0.395	-	-	-	-	-	-	-	-
APOE	rs429358	chr19:50103781	C vs. T	C	35	15973	0.96 (0.88-1.06)	0.436	-	-	-	-	-	-	-	-
APOE	rs7412*	chr19:50103919	T vs. C	All (C, A, H, O)	40	64074	1.08 (1.02-1.15)	0.00575	A	10499	A	0	C	Low OR, Regr	C	<1
APOE	rs7412*	chr19:50103919	T vs. C	C	32	61178	1.08 (1.02-1.14)	0.0126	A	10214	A	0	C	Low OR	C	<1
APOE	rs7412	chr19:50103919	T vs. C	A	5	2125	1.17 (0.85-1.60)	0.328	-	-	-	-	-	-	-	-
FTL	rs2230267	chr19:54160899	C vs. T	All (C only)	4	4013	0.95 (0.83-1.08)	0.416	-	-	-	-	-	-	-	-
DEFB118/DEFB119	rs6057657	chr20:29427491	G vs. A	All (C only)	4	9976	1.20 (0.94-1.54)	0.145	-	-	-	-	-	-	-	-
PRNP	rs1799990	chr20:4628251	G vs. A	All (C only)	6	3509	0.94 (0.85-1.04)	0.23	-	-	-	-	-	-	-	-
SS18L1	rs2427247	chr20:60155727	T vs. C	All (C only)	4	4209	0.99 (0.81-1.21)	0.928	-	-	-	-	-	-	-	-
PDXK	rs2838358	chr21:43975474	C vs. T	All (C only)	4	4855	0.98 (0.85-1.12)	0.71	-	-	-	-	-	-	-	-
PDXK	rs2010795*	chr21:43997056	A vs. G	All (C, A)	18	66690	1.00 (0.96-1.05)	0.913	-	-	-	-	-	-	-	-
PDXK	rs2010795*	chr21:43997056	A vs. G	C	17	65955	1.00 (0.96-1.05)	0.918	-	-	-	-	-	-	-	-
COMT	rs2075507	chr22:18308092	G vs. A	C	3	3561	1.01 (0.91-1.11)	0.922	-	-	-	-	-	-	-	-
COMT	rs2075507	chr22:18308092	G vs. A	All (C, O)	4	4244	1.00 (0.92-1.09)	0.989	-	-	-	-	-	-	-	-
COMT	rs4818	chr22:18331207	G vs. C	All (C, O)	5	4570	1.08 (0.98-1.18)	0.109	-	-	-	-	-	-	-	-
COMT	rs4818	chr22:18331207	G vs. C	C	4	3887	1.06 (0.96-1.18)	0.263	-	-	-	-	-	-	-	-
COMT	rs4680	chr22:18331271	A vs. G	C	11	10530	0.96 (0.89-1.04)	0.334	-	-	-	-	-	-	-	-
COMT	rs4680	chr22:18331271	A vs. G	All (C, A, O)	23	14374	0.99 (0.93-1.05)	0.655	-	-	-	-	-	-	-	-
COMT	rs4680	chr22:18331271	A vs. G	A	9	2759	1.03 (0.90-1.18)	0.689	-	-	-	-	-	-	-	-
UBE2L3	rs2266959	chr22:20252904	T vs. G	All (C, A)	4	4053	1.03 (0.93-1.16)	0.56	-	-	-	-	-	-	-	-
UBE2L3	rs2266959	chr22:20252904	T vs. G	C	3	3673	1.01 (0.90-1.13)	0.899	-	-	-	-	-	-	-	-
GSTT1	rs71748309	chr22:22706821	Del vs. Ins	C	9	5410	1.02 (0.86-1.21)	0.801	-	-	-	-	-	-	-	-
GSTT1	rs71748309	chr22:22706821	Del vs. Ins	All (C, A, O)	11	6186	1.01 (0.87-1.17)	0.901	-	-	-	-	-	-	-	-
ADORA2A	rs5996696*	chr22:23157622	C vs. A	All (C, A, D, H)	5	33118	0.85 (0.74-0.97)	0.0175	A	13501	A	0	A	-	A	<1
ADORA2A	rs3032740	chr22:23165040	Del vs. Ins	All (C, A, D, H)	5	3362	0.88 (0.79-0.98)	0.0185	A	2851	A	4	C	Low OR	C	<1
ADORA2A	rs5751876*	chr22:23167301	T vs. C	All (C, A, D, H)	15	61851	0.99 (0.95-1.03)	0.52	-	-	-	-	-	-	-	-
ADORA2A	rs5751876*	chr22:23167301	T vs. C	C	11	60880	0.99 (0.96-1.03)	0.701	-	-	-	-	-	-	-	-
RAC2	rs739043	chr22:35975176	G vs. A	All (C, A)	5	4716	0.95 (0.87-1.03)	0.197	-	-	-	-	-	-	-	-
RAC2	rs739043	chr22:35975176	G vs. A	C	4	4017	0.94 (0.85-1.05)	0.277	-	-	-	-	-	-	-	-
NDUFA6	rs1801311	chr22:40816669	T vs. C	All (C only)	4	8137	1.05 (0.98-1.14)	0.184	-	-	-	-	-	-	-	-
CYP2D6	rs3892097*	chr22:40854891	T vs. C	All (C, A, O)	30	30151	1.06 (0.99-1.13)	0.0799	-	-	-	-	-	-	-	-
CYP2D6	rs3892097*	chr22:40854891	T vs. C	C	24	28583	1.05 (0.99-1.12)	0.128	-	-	-	-	-	-	-	-
CYP2D6	rs3892097	chr22:40854891	T vs. C	A	4	1104	1.79 (0.48-6.63)	0.386	-	-	-	-	-	-	-	-
PASD1	rs7878232	chrX:150597031	G vs. T	All (C, A, O)	35	11119	1.04 (0.97-1.12)	0.304	-	-	-	-	-	-	-	-
PASD1	rs7878232	chrX:150597031	G vs. T	C	25	9687	1.03 (0.97-1.11)	0.328	-	-	-	-	-	-	-	-
MAOA	rs6323	chrX:43475980	G vs. T	All (C, A, O)	8	4668	1.09 (0.95-1.26)	0.228	-	-	-	-	-	-	-	-
MAOB	rs1799836	chrX:43512943	G vs. A	All (C, A, O)	26	12120	1.09 (1.00-1.19)	0.062	-	-	-	-	-	-	-	-
MAOB	rs1799836	chrX:43512943	G vs. A	C	16	10234	1.07 (0.98-1.18)	0.134	-	-	-	-	-	-	-	-
